# Supplementary material for: Caveolae respond to acute oxidative stress through membrane lipid peroxidation, cytosolic release of CAVIN1, and downstream regulation of NRF2
Source: bioRxiv preprint, doi:10.1101/2021.06.09.447684, version 2 (2022-01-11)
Supplement: Table S1 [file 447684_file05.xlsx]

## Sheet: Table S1. Comparative-proteomic
id	Peptides	Unique peptides	Sequence coverage [%]	Mol. weight [kDa]	Q-value	Score	Intensity	MS/MS count	Protein IDs	Majority protein IDs	Protein names	ENSG	Gene names	Difference Log2 LFQ int. Cavin1KO/HeLaWT	FDR<1%, s0=1.5	FDR	-Log10 p-value	Test statistic	Log2 LFQ int. 01-HeLaWT	Log2 LFQ int. 02-HeLaWT	Log2 LFQ int. 03-HeLaWT	Log2 LFQ int. 04-Cavin1KO	Log2 LFQ int. 05-Cavin1KO	Log2 LFQ int. 06-Cavin1KO	GOBP name	GOMF name	GOCC name	KEGG name	Corum	Pfam	Keywords
1090	29	20	60.6	80.214	0	259.57	11366000000	324	P08582	P08582	Melanotransferrin	ENSG00000163975	MFI2	-8.69689	+	0	5.63534	-5.06519	31.7244	31.7727	31.9803	22.7901	23.4898	23.1068	biological regulation;cation homeostasis;cation transport;cellular cation homeostasis;cellular chemical homeostasis;cellular homeostasis;cellular ion homeostasis;cellular iron ion homeostasis;cellular metal ion homeostasis;cellular process;chemical homeostasis;establishment of localization;homeostatic process;ion homeostasis;ion transport;iron ion homeostasis;iron ion transport;metal ion homeosta…	binding;cation binding;ferric iron binding;ion binding;iron ion binding;metal ion binding;transition metal ion binding	anchored to membrane;cell part;extracellular region;integral to membrane;integral to plasma membrane;intrinsic to membrane;intrinsic to plasma membrane;membrane part;plasma membrane part			Transferrin	Alternativesplicing;Cellmembrane;Completeproteome;Directproteinsequencing;Disulfidebond;Glycoprotein;GPI-anchor;Iontransport;Iron;Irontransport;Lipoprotein;Membrane;Metal-binding;Polymorphism;Referenceproteome;Repeat;Signal;Transport;Zinc
6204	40	40	40.5	136.38	0	323.31	7844200000	316	Q9P2M7;Q9P2M7-2;Q0VF96-2;Q0VF96	Q9P2M7;Q9P2M7-2	Cingulin	ENSG00000143375	CGN	-7.96261	+	0	5.62506	-4.6843	31.1796	30.9613	30.5472	23.0056	22.7845	23.0102	biological regulation;cell surface receptor linked signaling pathway;cellular process;cellular response to stimulus;enzyme linked receptor protein signaling pathway;regulation of biological process;regulation of cellular process;response to stimulus;signal transduction;transforming growth factor beta receptor signaling pathway;transmembrane receptor protein serine/threonine kinase signaling pathw…	actin binding;binding;catalytic activity;cytoskeletal protein binding;hydrolase activity;hydrolase activity, acting on acid anhydrides;hydrolase activity, acting on acid anhydrides, in phosphorus-containing anhydrides;motor activity;nucleoside-triphosphatase activity;protein binding;pyrophosphatase activity	cell junction;cell part;cell-cell junction;cytoskeletal part;intracellular organelle part;intracellular part;macromolecular complex;myosin complex;occluding junction;organelle part;protein complex;tight junction	Tight junction		Myosin_tail_1	Acetylation;Alternativesplicing;Celljunction;Coiledcoil;Completeproteome;Directproteinsequencing;Phosphoprotein;Polymorphism;Referenceproteome;Tightjunction
1297	50	50	40.5	194.46	0	323.31	12592000000	464	P16144-4;P16144-2;P16144-3;P16144;P16144-5	P16144-4;P16144-2;P16144-3;P16144	Integrin beta-4	ENSG00000132470	ITGB4	-7.84966	+	0	2.56455	-3.33426	31.8232	31.5139	32.2813	25.1022	22.944	NaN	biological adhesion;biological regulation;cell adhesion;cell junction assembly;cell junction organization;cell motility;cell projection assembly;cell projection organization;cell surface receptor linked signaling pathway;cell-matrix adhesion;cell-substrate adhesion;cell-substrate junction assembly;cellular component assembly;cellular component assembly at cellular level;cellular component movemen…	receptor activity	basal plasma membrane;basement membrane;cell junction;cell leading edge;cell part;cell surface;cell-substrate junction;extracellular matrix part;extracellular region part;hemidesmosome;integrin complex;macromolecular complex;membrane part;plasma membrane part;protein complex;receptor complex	Arrhythmogenic right ventricular cardiomyopathy (ARVC);Dilated cardiomyopathy;ECM-receptor interaction;Focal adhesion;Hypertrophic cardiomyopathy (HCM);Regulation of actin cytoskeleton	ITGA6-ITGB4 complex;ITGA6-ITGB4-CD151 complex;ITGA6-ITGB4-CD9 complex;ITGA6-ITGB4-FYN complex;ITGA6-ITGB4-LAMA5 complex;ITGA6-ITGB4-Laminin10/12 complex;ITGA6-ITGB4-SHC1-GRB2 complex	Calx-beta;EGF_2;fn3;Integrin_B_tail;Integrin_beta	3D-structure;Alternativesplicing;Celladhesion;Celljunction;Completeproteome;Directproteinsequencing;Diseasemutation;Disulfidebond;Epidermolysisbullosa;Glycoprotein;Integrin;Membrane;Phosphoprotein;Polymorphism;Receptor;Referenceproteome;Repeat;Signal;Transmembrane;Transmembranehelix
3576	14	14	49.7	43.476	0	300.87	15591000000	355	Q6NZI2;Q6NZI2-2;Q6NZI2-3	Q6NZI2;Q6NZI2-2;Q6NZI2-3	Polymerase I and transcript release factor	ENSG00000177469	PTRF	-7.79576	+	0	3.51997	-4.0963	31.7153	31.3873	32.1475	24.3378	23.5707	NaN	biological regulation;biosynthetic process;cellular biosynthetic process;cellular macromolecule metabolic process;cellular metabolic process;cellular nitrogen compound metabolic process;cellular process;macromolecule metabolic process;metabolic process;nitrogen compound metabolic process;nucleic acid metabolic process;nucleobase-containing compound metabolic process;primary metabolic process;regu…	binding;nucleic acid binding;RNA binding;rRNA binding;rRNA primary transcript binding	caveola;cell part;cytoplasmic part;cytosol;endoplasmic reticulum;intracellular membrane-bounded organelle;intracellular organelle;intracellular organelle part;intracellular part;membrane part;membrane raft;membrane-bounded organelle;mitochondrion;nuclear part;nucleoplasm;organelle;organelle part;plasma membrane part				Acetylation;Alternativesplicing;Cellmembrane;Coiledcoil;Completeproteome;Congenitalgeneralizedlipodystrophy;Cytoplasm;Diabetesmellitus;Directproteinsequencing;Endoplasmicreticulum;Membrane;Microsome;Mitochondrion;Nucleus;Phosphoprotein;Polymorphism;Referenceproteome;RNA-binding;rRNA-binding;Transcription;Transcriptionregulation;Transcriptiontermination
5411	55	55	45.5	162.5	0	323.31	9114100000	378	Q9BZF9;Q9BZF9-2	Q9BZF9;Q9BZF9-2	Uveal autoantigen with coiled-coil domains and ankyrin repeats	ENSG00000137831	UACA	-7.44061	+	0	4.53111	-4.01873	31.3443	31.1163	31.2455	24.02	24.2474	23.1169	biological regulation;cellular process;cellular response to stimulus;cellular response to stress;DNA damage response, signal transduction resulting in induction of apoptosis;induction of apoptosis;induction of apoptosis by intracellular signals;induction of apoptosis by oxidative stress;induction of programmed cell death;intracellular signal transduction;negative regulation of biological process;…		apoptosome;cell part;cytoplasmic part;cytoskeleton;cytosolic part;envelope;extracellular region;intracellular membrane-bounded organelle;intracellular non-membrane-bounded organelle;intracellular organelle;intracellular organelle part;intracellular part;macromolecular complex;membrane;membrane-bounded organelle;mitochondrion;non-membrane-bounded organelle;nuclear envelope;nuclear part;nucleus;org…			Ank_2	Alternativesplicing;ANKrepeat;Coiledcoil;Completeproteome;Cytoplasm;Cytoskeleton;Nucleus;Polymorphism;Referenceproteome;Repeat
6798	26	26	64.9	49.96	0	104.91	5347500000	196	Q9Y6N5	Q9Y6N5	Sulfide:quinone oxidoreductase, mitochondrial	ENSG00000137767	SQRDL	-6.67534	+	0	3.95579	-3.4397	30.9257	30.7561	30.8045	23.3832	24.1779	24.8991	amine catabolic process;amine metabolic process;carboxylic acid catabolic process;carboxylic acid metabolic process;catabolic process;cellular amine metabolic process;cellular amino acid catabolic process;cellular amino acid metabolic process;cellular catabolic process;cellular ketone metabolic process;cellular metabolic process;cellular nitrogen compound metabolic process;cellular process;metabo…	catalytic activity;oxidoreductase activity;oxidoreductase activity, acting on a sulfur group of donors;oxidoreductase activity, acting on a sulfur group of donors, quinone or similar compound as acceptor;sulfide:quinone oxidoreductase activity	cell part;cytoplasmic part;intracellular organelle part;intracellular part;membrane;mitochondrial inner membrane;mitochondrial membrane;mitochondrial part;organelle inner membrane;organelle membrane;organelle part			Pyr_redox_2	Completeproteome;FAD;Flavoprotein;Mitochondrion;NADP;Oxidoreductase;Polymorphism;Referenceproteome;Transitpeptide
5911	18	18	51.1	50.854	0	323.31	15279000000	306	Q9NS86	Q9NS86	LanC-like protein 2	ENSG00000132434	LANCL2	-6.67362	+	0	4.99879	-3.83437	29.4757	29.0784	29.7519	23.0151	22.7386	22.5315	biological regulation;metabolic process;negative regulation of biological process;negative regulation of biosynthetic process;negative regulation of cellular biosynthetic process;negative regulation of cellular macromolecule biosynthetic process;negative regulation of cellular metabolic process;negative regulation of cellular process;negative regulation of gene expression;negative regulation of m…	adenyl nucleotide binding;adenyl ribonucleotide binding;ATP binding;binding;catalytic activity;GTP binding;guanyl nucleotide binding;guanyl ribonucleotide binding;lipid binding;nucleotide binding;phosphatidylinositol binding;phosphatidylinositol-3-phosphate binding;phosphatidylinositol-4-phosphate binding;phosphatidylinositol-5-phosphate binding;phospholipid binding;purine nucleotide binding;puri…	cell cortex part;cell part;cortical actin cytoskeleton;cortical cytoskeleton;cytoplasmic part;cytoskeletal part;cytoskeleton;cytosol;intracellular membrane-bounded organelle;intracellular non-membrane-bounded organelle;intracellular organelle;intracellular organelle part;intracellular part;membrane;membrane-bounded organelle;non-membrane-bounded organelle;nucleus;organelle;organelle part;plasma m…			LANC_like	Cellmembrane;Completeproteome;Cytoplasm;Lipoprotein;Membrane;Myristate;Nucleus;Phosphoprotein;Polymorphism;Referenceproteome
993	20	18	50.9	56.381	0	71.094	2834500000	102	P05091;P05091-2;P00352	P05091;P05091-2	Aldehyde dehydrogenase, mitochondrial	ENSG00000111275	ALDH2	-6.27737	+	0	5.31266	-3.96862	30.0337	30.1131	29.9178	23.793	NaN	23.6953	alcohol catabolic process;alcohol metabolic process;biological regulation;biosynthetic process;carbohydrate metabolic process;catabolic process;cellular biosynthetic process;cellular metabolic process;cellular process;ethanol catabolic process;ethanol metabolic process;ethanol oxidation;metabolic process;neurotransmitter biosynthetic process;neurotransmitter metabolic process;oxidation-reduction …	aldehyde dehydrogenase (NAD) activity;aldehyde dehydrogenase [NAD(P)+] activity;catalytic activity;electron carrier activity;oxidoreductase activity;oxidoreductase activity, acting on the aldehyde or oxo group of donors;oxidoreductase activity, acting on the aldehyde or oxo group of donors, NAD or NADP as acceptor	cell part;cytoplasmic part;intracellular organelle lumen;intracellular organelle part;intracellular part;membrane-enclosed lumen;mitochondrial matrix;mitochondrial part;organelle lumen;organelle part	Arginine and proline metabolism;Ascorbate and aldarate metabolism;beta-Alanine metabolism;Chloroalkane and chloroalkene degradation;Fatty acid metabolism;Glycerolipid metabolism;Glycolysis / Gluconeogenesis;Histidine metabolism;Limonene and pinene degradation;Lysine degradation;Pentose and glucuronate interconversions;Propanoate metabolism;Pyruvate metabolism;Tryptophan metabolism;Valine, leucine…		Aldedh	3D-structure;Acetylation;Alternativesplicing;Completeproteome;Directproteinsequencing;Mitochondrion;NAD;Oxidoreductase;Polymorphism;Referenceproteome;Transitpeptide
1329	23	23	26	129.29	0	155.53	3954900000	152	P17301	P17301	Integrin alpha-2	ENSG00000164171	ITGA2	-5.85515	+	0	2.60679	-2.47696	29.9991	30.318	30.5771	23.2305	24.0233	26.075	anatomical structure morphogenesis;axon guidance;biological adhesion;biological regulation;blood coagulation;cell adhesion;cell surface receptor linked signaling pathway;cell-matrix adhesion;cell-substrate adhesion;cellular process;cellular response to stimulus;chemotaxis;coagulation;developmental process;hemostasis;integrin-mediated signaling pathway;interaction with host;interspecies interactio…	binding;cation binding;collagen binding;ion binding;metal ion binding;protein binding	basal part of cell;cell part;cell surface;external side of plasma membrane;integrin complex;macromolecular complex;membrane part;plasma membrane part;protein complex;receptor complex	Arrhythmogenic right ventricular cardiomyopathy (ARVC);Dilated cardiomyopathy;ECM-receptor interaction;Focal adhesion;Hematopoietic cell lineage;Hypertrophic cardiomyopathy (HCM);Pathways in cancer;Phagosome;Regulation of actin cytoskeleton;Small cell lung cancer	ITGA2-ITGB1 complex;ITGA2-ITGB1-CD47 complex;ITGA2-ITGB1-CHAD complex;ITGA2-ITGB1-COL6A3 complex	FG-GAP;Integrin_alpha2;VWA	3D-structure;Calcium;Celladhesion;Completeproteome;Directproteinsequencing;Disulfidebond;Glycoprotein;Hostcellreceptorforvirusentry;Host-virusinteraction;Integrin;Magnesium;Membrane;Metal-binding;Polymorphism;Receptor;Referenceproteome;Repeat;Signal;Transmembrane;Transmembranehelix
1153	12	2	44.3	40.648	0	61.932	7598000000	194	P10321	P10321	HLA class I histocompatibility antigen, Cw-7 alpha chain	ENSG00000204525	HLA-C	-5.73908	+	0	3.17366	-2.73198	28.5229	28.4782	28.0974	21.5726	22.7139	23.5947	antigen processing and presentation;antigen processing and presentation of exogenous antigen;antigen processing and presentation of exogenous peptide antigen;antigen processing and presentation of exogenous peptide antigen via MHC class I;antigen processing and presentation of exogenous peptide antigen via MHC class I, TAP-dependent;antigen processing and presentation of exogenous peptide antigen…		cell part;coated vesicle membrane;cytoplasmic part;cytoplasmic vesicle membrane;cytoplasmic vesicle part;early endosome membrane;endocytic vesicle membrane;endoplasmic reticulum part;endosomal part;endosome membrane;ER to Golgi transport vesicle membrane;Golgi apparatus part;Golgi membrane;integral to endoplasmic reticulum membrane;integral to lumenal side of endoplasmic reticulum membrane;integr…	Allograft rejection;Antigen processing and presentation;Autoimmune thyroid disease;Cell adhesion molecules (CAMs);Endocytosis;Graft-versus-host disease;Natural killer cell mediated cytotoxicity;Phagosome;Type I diabetes mellitus;Viral myocarditis		C1-set;MHC_I;MHC_I_C	3D-structure;Completeproteome;Disulfidebond;Glycoprotein;Host-virusinteraction;Immunity;Membrane;MHCI;Polymorphism;Referenceproteome;Signal;Transmembrane;Transmembranehelix;Ublconjugation
4748	8	8	42.6	32.633	0	137.37	4501400000	109	Q96DC8;Q96DC8-2	Q96DC8;Q96DC8-2	Enoyl-CoA hydratase domain-containing protein 3, mitochondrial	ENSG00000134463	ECHDC3	-5.70645	+	0	5.60122	-3.65904	30.2292	30.228	30.3508	24.5254	24.6004	NaN		catalytic activity	cell part;cytoplasmic part;intracellular membrane-bounded organelle;intracellular organelle;intracellular part;membrane-bounded organelle;mitochondrion;organelle			ECH	3D-structure;Alternativesplicing;Completeproteome;Mitochondrion;Polymorphism;Referenceproteome;Transitpeptide
5838	15	15	53.9	54.671	0	95.677	3874000000	111	Q9NQH7-4;Q9NQH7;Q9NQH7-2;Q9NQH7-3;Q9NQH7-5	Q9NQH7-4;Q9NQH7;Q9NQH7-2	Probable Xaa-Pro aminopeptidase 3	ENSG00000196236	XPNPEP3	-5.64544	+	0	6.1589	-3.51926	29.9177	29.7949	29.9119	24.0422	24.3612	24.2847	cellular process;glomerular filtration;macromolecule metabolic process;metabolic process;multicellular organismal process;primary metabolic process;protein maturation;protein metabolic process;protein processing;proteolysis;renal system process;system process	aminopeptidase activity;binding;catalytic activity;cation binding;exopeptidase activity;hydrolase activity;ion binding;manganese ion binding;metal ion binding;metallopeptidase activity;peptidase activity;peptidase activity, acting on L-amino acid peptides;transition metal ion binding	cell part;cytoplasmic part;intracellular membrane-bounded organelle;intracellular organelle;intracellular part;membrane-bounded organelle;mitochondrion;organelle			AMP_N;Peptidase_M24	Alternativesplicing;Aminopeptidase;Ciliopathy;Completeproteome;Diseasemutation;Hydrolase;Manganese;Metal-binding;Metalloprotease;Mitochondrion;Nephronophthisis;Polymorphism;Protease;Referenceproteome
924	60	57	67.5	134.28	0	323.31	444460000000	4092	P00533;P00533-4;P00533-3;P00533-2	P00533	Epidermal growth factor receptor	ENSG00000146648	EGFR	-5.62182	+	0	7.05078	-3.59901	36.774	36.6863	36.7761	31.188	31.0152	31.1677	activation of phospholipase A2 activity;activation of phospholipase A2 activity by calcium-mediated signaling;activation of phospholipase C activity;anatomical structure development;anatomical structure morphogenesis;axon guidance;biological adhesion;biological regulation;calcium-mediated signaling;cell adhesion;cell migration;cell motility;cell proliferation;cell surface receptor linked signalin…	actin binding;actin filament binding;adenyl nucleotide binding;adenyl ribonucleotide binding;ATP binding;binding;catalytic activity;cytoskeletal protein binding;DNA binding;double-stranded DNA binding;epidermal growth factor-activated receptor activity;kinase activity;MAP kinase kinase kinase activity;molecular transducer activity;nucleic acid binding;nucleotide binding;phosphotransferase activit…	basolateral plasma membrane;cell part;cytoplasmic membrane-bounded vesicle;cytoplasmic part;cytoplasmic vesicle;endocytic vesicle;endoplasmic reticulum membrane;endoplasmic reticulum part;endosomal part;endosome;endosome membrane;extracellular region part;extracellular space;Golgi apparatus part;Golgi membrane;integral to membrane;intracellular membrane-bounded organelle;intracellular organelle;i…	Adherens junction;Bladder cancer;Calcium signaling pathway;Cytokine-cytokine receptor interaction;Dorso-ventral axis formation;Endocytosis;Endometrial cancer;Epithelial cell signaling in Helicobacter pylori infection;ErbB signaling pathway;Focal adhesion;Gap junction;Glioma;GnRH signaling pathway;Hepatitis C;MAPK signaling pathway;MAPK signaling pathway - fly;Melanoma;Non-small cell lung cancer;P…	CIN85-CBL-SH3GL2-EGFR complex, EGF stimulated;EGFR-CBL-GRB2 complex;EGFR-containing signaling complex;ITGAV-ITGB3-EGFR complex;Multiprotein complex (monoubiquitination);PARK2-EPS15-EGFR;RIN1-STAM2-EGFR complex, EGF stimulated;SH3KBP1-CBLB-EGFR complex;SNX complex (SNX1a, SNX2, SNX4, EGFR)	Furin-like;Pkinase_Tyr;Recep_L_domain	3D-structure;Alternativesplicing;ATP-binding;Cellmembrane;Completeproteome;Developmentalprotein;Directproteinsequencing;Diseasemutation;Disulfidebond;Endoplasmicreticulum;Endosome;Glycoprotein;Golgiapparatus;Isopeptidebond;Kinase;Membrane;Methylation;Nucleotide-binding;Nucleus;Phosphoprotein;Polymorphism;Receptor;Referenceproteome;Repeat;Secreted;Signal;Transferase;Transmembrane;Transmembraneheli…
4727	15	15	35.4	66.798	0	101.57	2480900000	111	Q96CM8-3;Q96CM8;Q96CM8-2;Q96CM8-4	Q96CM8-3;Q96CM8;Q96CM8-2;Q96CM8-4	Acyl-CoA synthetase family member 2, mitochondrial	ENSG00000167107	ACSF2	-4.95187	+	0	3.60359	-2.60374	29.6802	29.2786	29.2063	25.0119	23.7354	24.5621	carboxylic acid metabolic process;cellular ketone metabolic process;cellular lipid metabolic process;cellular metabolic process;cellular process;fatty acid metabolic process;lipid metabolic process;metabolic process;monocarboxylic acid metabolic process;organic acid metabolic process;oxoacid metabolic process;primary metabolic process;small molecule metabolic process	adenyl nucleotide binding;adenyl ribonucleotide binding;ATP binding;binding;catalytic activity;ligase activity;nucleotide binding;purine nucleotide binding;purine ribonucleoside triphosphate binding;purine ribonucleotide binding;ribonucleotide binding	cell part;cytoplasmic part;intracellular membrane-bounded organelle;intracellular organelle;intracellular part;membrane-bounded organelle;mitochondrion;organelle			AMP-binding;DUF4009	ATP-binding;Completeproteome;Fattyacidmetabolism;Ligase;Lipidmetabolism;Mitochondrion;Nucleotide-binding;Polymorphism;Referenceproteome;Transitpeptide
5348	6	6	19.4	50.182	0	38.437	694640000	40	Q9BX59;Q9BX59-3;Q9BX59-2;Q9BX59-7;Q9BX59-5;Q9BX59-4;Q9BX59-6	Q9BX59;Q9BX59-3;Q9BX59-2;Q9BX59-7;Q9BX59-5	Tapasin-related protein	ENSG00000139192	TAPBPL	-4.51856	+	0	4.15013	-2.55816	27.6695	27.9508	27.5234	23.4625	22.7276	23.3979	antigen processing and presentation;antigen processing and presentation of endogenous antigen;antigen processing and presentation of endogenous peptide antigen;antigen processing and presentation of endogenous peptide antigen via MHC class I;antigen processing and presentation of peptide antigen;antigen processing and presentation of peptide antigen via MHC class I;immune system process		cell part;cytoplasmic part;endoplasmic reticulum membrane;endoplasmic reticulum part;integral to membrane;intracellular organelle part;intracellular part;intrinsic to membrane;membrane;membrane part;organelle membrane;organelle part;plasma membrane			C1-set;V-set	Cellmembrane;Completeproteome;Directproteinsequencing;Disulfidebond;Endoplasmicreticulum;Immunoglobulindomain;Membrane;Microsome;Polymorphism;Referenceproteome;Repeat;Signal;Transmembrane;Transmembranehelix
3313	4	4	26	16.953	0	47.24	2864200000	56	Q56VL3;Q56VL3-2	Q56VL3	OCIA domain-containing protein 2	ENSG00000145247	OCIAD2	-4.48687	+	0	6.24017	-2.8416	29.2375	29.2504	29.1917	24.8042	24.8284	24.5864			cell part;cytoplasmic part;endosome;intracellular membrane-bounded organelle;intracellular organelle;intracellular organelle part;intracellular part;membrane;membrane-bounded organelle;mitochondrial inner membrane;mitochondrial membrane;mitochondrial part;organelle;organelle inner membrane;organelle membrane;organelle part			OCIA	Acetylation;Alternativesplicing;Completeproteome;Endosome;Polymorphism;Referenceproteome
1567	25	5	38.7	97.55	0	142.95	5900400000	157	P29590;P29590-11;P29590-5;P29590-2;P29590-9;P29590-3;P29590-8;P29590-12;P29590-13;P29590-14;P29590-10	P29590;P29590-11;P29590-5;P29590-2;P29590-9;P29590-3;P29590-8;P29590-12;P29590-13;P29590-14;P29590-10	Protein PML	ENSG00000140464	PML	-4.28295	+	0	4.19369	-2.45283	30.5752	30.6895	30.507	26.6553	26.4211	25.8464	activation of caspase activity;aging;anatomical structure morphogenesis;biological regulation;biosynthetic process;branching involved in mammary gland duct morphogenesis;branching morphogenesis of a tube;calcium ion homeostasis;catabolic process;cation homeostasis;cell aging;cell cycle arrest;cell cycle process;cell differentiation;cell fate commitment;cell surface receptor linked signaling pathw…	binding;cation binding;cobalt ion binding;DNA binding;ion binding;metal ion binding;nucleic acid binding;protein binding;protein binding transcription factor activity;protein dimerization activity;protein heterodimerization activity;transcription coactivator activity;transcription cofactor activity;transcription factor binding transcription factor activity;transition metal ion binding;zinc ion bi…	cell part;cytoplasm;cytoplasmic part;cytosol;early endosome membrane;endoplasmic reticulum part;endosomal part;endosome membrane;extrinsic to endoplasmic reticulum membrane;extrinsic to membrane;extrinsic to organelle membrane;intracellular membrane-bounded organelle;intracellular non-membrane-bounded organelle;intracellular organelle;intracellular organelle part;intracellular part;membrane;membr…	Acute myeloid leukemia;Endocytosis;Pathways in cancer;Ubiquitin mediated proteolysis	PML-SMAD2/3-SARA complex;ZNF198-PML complex	DUF3583;zf-B_box	3D-structure;Acetylation;Activator;Alternativesplicing;Antiviraldefense;Apoptosis;Chromosomalrearrangement;Coiledcoil;Completeproteome;Cytoplasm;DNA-binding;Endoplasmicreticulum;Endosome;Host-virusinteraction;Immunity;Innateimmunity;Isopeptidebond;Membrane;Metal-binding;Nucleus;Phosphoprotein;Polymorphism;Proto-oncogene;Referenceproteome;Repeat;Transcription;Transcriptionregulation;Tumorsuppresso…
876	23	23	52.8	55.634	0	185.92	5707700000	177	O95793-3;O95793-2;O95793	O95793-3;O95793-2;O95793	Double-stranded RNA-binding protein Staufen homolog 1	ENSG00000124214	STAU1	-4.13441	+	0	4.97146	-2.50366	29.0707	29.2447	29.4158	24.9799	25.0115	25.3365	cellular localization;cellular macromolecule localization;cellular process;intracellular mRNA localization;localization;macromolecule localization;RNA localization	binding;double-stranded RNA binding;nucleic acid binding;RNA binding	cell part;cytoplasmic part;cytoskeletal part;endoplasmic reticulum;intracellular membrane-bounded organelle;intracellular non-membrane-bounded organelle;intracellular organelle;intracellular organelle part;intracellular part;macromolecular complex;membrane-bounded organelle;microtubule associated complex;non-membrane-bounded organelle;organelle;organelle part;protein complex;ribonucleoprotein com…			dsrm	3D-structure;Acetylation;Alternativesplicing;Completeproteome;Cytoplasm;Endoplasmicreticulum;Phosphoprotein;Referenceproteome;Repeat;RNA-binding
3114	4	4	15	35.215	0	38.728	1641700000	67	Q15800;Q15800-2	Q15800;Q15800-2	Methylsterol monooxygenase 1	ENSG00000052802	MSMO1	-3.97319	+	0	3.62896	-2.35257	28.7819	28.5269	28.4772	24.8158	24.4285	NaN	alcohol metabolic process;biosynthetic process;carboxylic acid biosynthetic process;carboxylic acid metabolic process;cellular biosynthetic process;cellular ketone metabolic process;cellular lipid metabolic process;cellular metabolic process;cellular process;cholesterol biosynthetic process;cholesterol metabolic process;fatty acid biosynthetic process;fatty acid metabolic process;lipid biosynthet…	binding;C-4 methylsterol oxidase activity;catalytic activity;cation binding;ion binding;iron ion binding;metal ion binding;monooxygenase activity;oxidoreductase activity;oxidoreductase activity, acting on paired donors, with incorporation or reduction of molecular oxygen;oxidoreductase activity, acting on paired donors, with incorporation or reduction of molecular oxygen, NADH or NADPH as one don…	cell part;cytoplasmic part;endoplasmic reticulum membrane;endoplasmic reticulum part;integral to membrane;intracellular organelle part;intracellular part;intrinsic to membrane;membrane;membrane part;organelle membrane;organelle part;plasma membrane	Steroid biosynthesis		FA_hydroxylase	Alternativesplicing;Completeproteome;Endoplasmicreticulum;Iron;Lipidbiosynthesis;Lipidmetabolism;Membrane;NAD;Oxidoreductase;Polymorphism;Referenceproteome;Steroidbiosynthesis;Steroidmetabolism;Sterolbiosynthesis;Sterolmetabolism;Transmembrane;Transmembranehelix
998	6	6	50.3	17.887	0	161.04	4074800000	86	P05161	P05161	Ubiquitin-like protein ISG15	ENSG00000187608	ISG15	-3.96934	+	0	4.08109	-2.27657	28.3768	28.7622	28.5824	25.017	24.2835	24.5129	biological regulation;catabolic process;cell communication;cell surface receptor linked signaling pathway;cell-cell signaling;cellular catabolic process;cellular macromolecule catabolic process;cellular macromolecule metabolic process;cellular metabolic process;cellular process;cellular protein metabolic process;cellular response to chemical stimulus;cellular response to cytokine stimulus;cellula…	protein tag	cell part;cytoplasmic part;cytosol;extracellular region part;extracellular space;intracellular part	RIG-I-like receptor signaling pathway		ubiquitin	3D-structure;Antiviraldefense;Completeproteome;Cytoplasm;Directproteinsequencing;Host-virusinteraction;Isopeptidebond;Polymorphism;Referenceproteome;Repeat;Secreted;Ublconjugationpathway
3287	3	3	32.9	17.092	0	27.98	1932200000	56	Q53GA4	Q53GA4	Pleckstrin homology-like domain family A member 2	ENSG00000181649	PHLDA2	-3.69694	+	0	2.24945	-1.69386	28.4609	26.9606	29.2831	24.4881	24.4687	24.657	anatomical structure morphogenesis;apoptosis;cell death;cellular process;death;developmental process;organ morphogenesis;programmed cell death	binding;lipid binding;phospholipid binding	cell part;cytoplasm;intracellular part;membrane				Completeproteome;Cytoplasm;Membrane;Phosphoprotein;Referenceproteome
4386	19	19	53	57.903	0	185.93	4213000000	147	Q8TD30;Q8TD30-2;P24298	Q8TD30;Q8TD30-2	Alanine aminotransferase 2	ENSG00000166123	GPT2	-3.60437	+	0	3.61754	-2.01351	29.951	30.2112	29.7569	26.1646	26.8821	26.0593	2-oxoglutarate metabolic process;alanine catabolic process;alanine metabolic process;amine biosynthetic process;amine catabolic process;amine metabolic process;biosynthetic process;carboxylic acid biosynthetic process;carboxylic acid catabolic process;carboxylic acid metabolic process;catabolic process;cellular amine metabolic process;cellular amino acid biosynthetic process;cellular amino acid c…	alanine-oxo-acid transaminase activity;binding;catalytic activity;cofactor binding;L-alanine:2-oxoglutarate aminotransferase activity;pyridoxal phosphate binding;transaminase activity;transferase activity;transferase activity, transferring nitrogenous groups;vitamin B6 binding;vitamin binding	cell part;cytoplasmic part;intracellular organelle lumen;intracellular organelle part;intracellular part;membrane-enclosed lumen;mitochondrial matrix;mitochondrial part;organelle lumen;organelle part	Alanine, aspartate and glutamate metabolism;Carbon fixation in photosynthetic organisms		Aminotran_1_2	3D-structure;Alternativesplicing;Aminotransferase;Completeproteome;Pyridoxalphosphate;Referenceproteome;Transferase
3856	31	31	54.3	75.388	0	234.87	22760000000	494	Q86SF2	Q86SF2	N-acetylgalactosaminyltransferase 7	ENSG00000109586	GALNT7	-3.36391	+	0	5.5942	-2.12107	32.542	32.3623	32.3142	29.1108	28.943	29.073	carbohydrate metabolic process;cellular carbohydrate metabolic process;cellular macromolecule metabolic process;cellular metabolic process;cellular process;cellular protein metabolic process;glycosylation;macromolecule glycosylation;macromolecule metabolic process;macromolecule modification;metabolic process;O-glycan processing;post-translational protein modification;primary metabolic process;pro…	acetylgalactosaminyltransferase activity;catalytic activity;polypeptide N-acetylgalactosaminyltransferase activity;transferase activity;transferase activity, transferring glycosyl groups;transferase activity, transferring hexosyl groups;UDP-glycosyltransferase activity	cell part;cytoplasmic part;Golgi apparatus part;Golgi membrane;integral to membrane;intracellular organelle part;intracellular part;intrinsic to membrane;membrane;membrane part;organelle membrane;organelle part	Mucin type O-Glycan biosynthesis		Glyco_transf_7C;Glycos_transf_2;Ricin_B_lectin	Calcium;Completeproteome;Disulfidebond;Glycosyltransferase;Golgiapparatus;Lectin;Manganese;Membrane;Referenceproteome;Signal-anchor;Transferase;Transmembrane;Transmembranehelix
3778	16	16	37.1	60.207	0	36.094	2396200000	82	Q7L5N7;Q7L5N7-2	Q7L5N7;Q7L5N7-2	Lysophosphatidylcholine acyltransferase 2	ENSG00000087253	LPCAT2	-3.33655	+	0	4.73801	-2.03472	29.0887	29.1418	29.1277	25.8552	25.5144	25.9789	alcohol metabolic process;amine metabolic process;biosynthetic process;cellular amine metabolic process;cellular biogenic amine metabolic process;cellular biosynthetic process;cellular component organization;cellular component organization or biogenesis;cellular lipid metabolic process;cellular membrane organization;cellular metabolic process;cellular nitrogen compound metabolic process;cellular …	1-acylglycerophosphocholine O-acyltransferase activity;1-alkylglycerophosphocholine O-acetyltransferase activity;acetyltransferase activity;binding;calcium ion binding;catalytic activity;cation binding;ion binding;metal ion binding;O-acetyltransferase activity;O-acyltransferase activity;transferase activity;transferase activity, transferring acyl groups;transferase activity, transferring acyl gro…	cell part;cytoplasmic part;endoplasmic reticulum membrane;endoplasmic reticulum part;Golgi apparatus part;Golgi membrane;Golgi stack;integral to membrane;intracellular organelle part;intracellular part;intrinsic to membrane;membrane;membrane part;organelle membrane;organelle part	Ether lipid metabolism;Glycerophospholipid metabolism		Acyltransferase;EF_hand_5	Acyltransferase;Alternativesplicing;Calcium;Completeproteome;Endoplasmicreticulum;Golgiapparatus;Lipidbiosynthesis;Lipidmetabolism;Membrane;Metal-binding;Phospholipidbiosynthesis;Phospholipidmetabolism;Polymorphism;Referenceproteome;Repeat;Signal-anchor;Transferase;Transmembrane;Transmembranehelix
4115	10	1	65.1	27.389	0	48.423	1461700000	56	Q8N2F6-4;Q8N2F6-2;Q8N2F6-6;Q8N2F6-5	Q8N2F6-4;Q8N2F6-2;Q8N2F6-6;Q8N2F6-5	Armadillo repeat-containing protein 10	ENSG00000170632	ARMC10	-3.31045	+	0	2.61492	-1.79308	29.0449	28.2333	28.9869	25.5485	25.3407	NaN	biological regulation;regulation of biological process;regulation of growth		cell part;cytoplasmic part;endoplasmic reticulum membrane;endoplasmic reticulum part;integral to membrane;intracellular membrane-bounded organelle;intracellular organelle;intracellular organelle part;intracellular part;intrinsic to membrane;membrane;membrane part;membrane-bounded organelle;mitochondrion;organelle;organelle membrane;organelle part			Arm_2	Alternativesplicing;Completeproteome;Directproteinsequencing;Endoplasmicreticulum;Growthregulation;Membrane;Phosphoprotein;Polymorphism;Referenceproteome;Transmembrane;Transmembranehelix
4002	12	12	23.9	79.845	0	61.025	3037400000	114	Q8IWA5-3;Q8IWA5;Q8IWA5-2	Q8IWA5-3;Q8IWA5;Q8IWA5-2	Choline transporter-like protein 2	ENSG00000129353	SLC44A2	-3.30405	+	0	3.97853	-1.92629	29.1904	28.9777	29.2733	25.4643	25.9425	26.1225	alcohol metabolic process;amine metabolic process;biological regulation;biosynthetic process;cellular amine metabolic process;cellular biogenic amine metabolic process;cellular biosynthetic process;cellular lipid metabolic process;cellular metabolic process;cellular nitrogen compound metabolic process;cellular process;ethanolamine-containing compound metabolic process;glycerolipid biosynthetic pr…	active transmembrane transporter activity;amine transmembrane transporter activity;choline transmembrane transporter activity;molecular transducer activity;signal transducer activity;substrate-specific transmembrane transporter activity;substrate-specific transporter activity;transmembrane transporter activity;transporter activity	cell part;integral to membrane;intrinsic to membrane;membrane;membrane part;plasma membrane			Choline_transpo	Alternativepromoterusage;Alternativesplicing;Completeproteome;Glycoprotein;Membrane;Polymorphism;Referenceproteome;Transmembrane;Transmembranehelix;Transport
5741	3	3	21.8	17.201	0	19.308	1226000000	33	Q9HBL7	Q9HBL7	Plasminogen receptor (KT)	ENSG00000107020	PLGRKT	-3.29582	+	0	3.05058	-1.88853	28.5328	28.0739	28.0235	NaN	24.7426	25.0859	biological regulation;chemotaxis;defense response;inflammatory response;locomotion;positive regulation of plasminogen activation;positive regulation of protein processing;regulation of biological process;regulation of gene expression;regulation of macromolecule metabolic process;regulation of metabolic process;regulation of plasminogen activation;regulation of primary metabolic process;regulation…		cell part;cytoplasmic part;integral to membrane;integral to plasma membrane;intracellular membrane-bounded organelle;intracellular organelle;intracellular part;intrinsic to membrane;intrinsic to plasma membrane;membrane part;membrane-bounded organelle;mitochondrion;organelle;plasma membrane part			DUF2368	Cellmembrane;Chemotaxis;Completeproteome;Inflammatoryresponse;Membrane;Plasminogenactivation;Referenceproteome;Transmembrane;Transmembranehelix
1358	11	0	38.1	40.455	0	185.66	4410800000	96	P30685;P30498;P30491;P30490;P18464;P30495;P10319;P18465;P30488;P30487	P30685;P30498;P30491;P30490;P18464;P30495;P10319;P18465;P30488;P30487	HLA class I histocompatibility antigen, B-35 alpha chain;HLA class I histocompatibility antigen, B-78 alpha chain;HLA class I histocompatibility antigen, B-53 alpha chain;HLA class I histocompatibility antigen, B-52 alpha chain;HLA class I histocompatibility antigen, B-51 alpha chain;HLA class I histocompatibility antigen, B-56 alpha chain;HLA class I histocompatibility antigen, B-58 alpha chain;…	ENSG00000206450;ENSG00000224608;ENSG00000232126	HLA-B	-3.22875	+	0	4.77071	-1.97749	30.0693	30.3654	30.2894	26.818	27.0814	27.1385	antigen processing and presentation;antigen processing and presentation of exogenous antigen;antigen processing and presentation of exogenous peptide antigen;antigen processing and presentation of exogenous peptide antigen via MHC class I;antigen processing and presentation of exogenous peptide antigen via MHC class I, TAP-dependent;antigen processing and presentation of exogenous peptide antigen…		cell part;coated vesicle membrane;cytoplasmic part;cytoplasmic vesicle membrane;cytoplasmic vesicle part;early endosome membrane;endocytic vesicle membrane;endoplasmic reticulum part;endosomal part;endosome membrane;ER to Golgi transport vesicle membrane;Golgi apparatus part;Golgi membrane;integral to endoplasmic reticulum membrane;integral to lumenal side of endoplasmic reticulum membrane;integr…			C1-set;MHC_I;MHC_I_C	3D-structure;Completeproteome;Disulfidebond;Glycoprotein;Host-virusinteraction;Immunity;Membrane;MHCI;Polymorphism;Referenceproteome;Signal;Transmembrane;Transmembranehelix;Ublconjugation
4356	22	22	43.9	83.023	0	131.07	2473000000	121	Q8TBA6;Q8TBA6-2	Q8TBA6;Q8TBA6-2	Golgin subfamily A member 5	ENSG00000066455	GOLGA5	-3.17935	+	0	5.2135	-1.98561	29.7859	29.5276	29.6541	26.3398	26.5403	26.5494	cellular component organization;cellular component organization at cellular level;cellular component organization or biogenesis;cellular component organization or biogenesis at cellular level;cellular process;establishment of localization;establishment of localization in cell;Golgi organization;Golgi vesicle transport;intracellular transport;organelle organization;transport;vesicle-mediated trans…	binding;enzyme binding;GTPase binding;protein binding;Rab GTPase binding;Ras GTPase binding;small GTPase binding	cell part;cis-Golgi network;cytoplasmic part;Golgi apparatus part;Golgi cisterna;Golgi membrane;integral to membrane;intracellular organelle part;intracellular part;intrinsic to membrane;membrane;membrane part;organelle membrane;organelle part;organelle subcompartment			Golgin_A5	Alternativesplicing;Chromosomalrearrangement;Coiledcoil;Completeproteome;Golgiapparatus;Membrane;Methylation;Phosphoprotein;Polymorphism;Referenceproteome;Transmembrane;Transmembranehelix
2256	4	4	46.4	13.415	0	37.386	5476700000	82	P61916-2;P61916	P61916-2;P61916	Epididymal secretory protein E1	ENSG00000119655	NPC2	-3.16468	+	0	4.31501	-1.99199	30.0924	30.2068	30.1426	27.0869	NaN	26.8783	alcohol metabolic process;biological regulation;chemical homeostasis;cholesterol efflux;cholesterol homeostasis;cholesterol metabolic process;cholesterol transport;establishment of localization;establishment of localization in cell;glycolipid transport;homeostatic process;intracellular cholesterol transport;intracellular lipid transport;intracellular sterol transport;intracellular transport;lipid…	binding;cholesterol binding;lipid binding;steroid binding;sterol binding	cell part;cytoplasmic part;endoplasmic reticulum;extracellular region;intracellular membrane-bounded organelle;intracellular organelle;intracellular part;lysosome;lytic vacuole;membrane-bounded organelle;organelle;vacuole	Lysosome		E1_DerP2_DerF2	Cholesterolmetabolism;Completeproteome;Directproteinsequencing;Diseasemutation;Disulfidebond;Endoplasmicreticulum;Glycoprotein;Lipidmetabolism;Lysosome;Niemann-Pickdisease;Polymorphism;Referenceproteome;Secreted;Signal;Steroidmetabolism;Sterolmetabolism
1560	29	28	48	108.27	0	201.28	9275800000	301	P29317;P29317-2	P29317	Ephrin type-A receptor 2	ENSG00000142627	EPHA2	-3.1444	+	0	5.35724	-1.97499	31.1145	31.0607	31.3506	28.0703	27.9885	28.0339	activation of Rac GTPase activity;activation of Ras GTPase activity;activation of Rho GTPase activity;anatomical structure development;anatomical structure formation involved in morphogenesis;anatomical structure morphogenesis;angiogenesis;axial mesoderm formation;biological adhesion;biological regulation;bone remodeling;branching involved in mammary gland duct morphogenesis;branching morphogenes…	adenyl nucleotide binding;adenyl ribonucleotide binding;ATP binding;binding;catalytic activity;ephrin receptor activity;kinase activity;molecular transducer activity;nucleotide binding;phosphotransferase activity, alcohol group as acceptor;protein kinase activity;protein tyrosine kinase activity;purine nucleotide binding;purine ribonucleoside triphosphate binding;purine ribonucleotide binding;rec…	adherens junction;anchoring junction;cell junction;cell part;cell projection membrane;cell projection part;cell-substrate adherens junction;cell-substrate junction;focal adhesion;integral to membrane;integral to plasma membrane;intrinsic to membrane;intrinsic to plasma membrane;lamellipodium membrane;leading edge membrane;membrane part;plasma membrane part;ruffle membrane	Axon guidance	TIAM1-EFNB1-EPHA2 complex	Ephrin_lbd;fn3;Pkinase_Tyr;SAM_1	3D-structure;Angiogenesis;Apoptosis;ATP-binding;Cataract;Celladhesion;Celljunction;Cellmembrane;Cellprojection;Completeproteome;Differentiation;Diseasemutation;Disulfidebond;Glycoprotein;Kinase;Membrane;Nucleotide-binding;Phosphoprotein;Polymorphism;Receptor;Referenceproteome;Repeat;Signal;Transferase;Transmembrane;Transmembranehelix;Tyrosine-proteinkinase;Ublconjugation
512	40	40	26.8	204.74	0	119.85	4269800000	114	O60437	O60437	Periplakin	ENSG00000118898	PPL	-3.02678	+	0	5.0046	-1.88151	29.2434	29.3021	29.2576	26.06	26.2317	26.4312	developmental process;keratinization	structural constituent of cytoskeleton;structural molecule activity	anchoring junction;cell junction;cell part;cell-cell junction;cytoplasmic part;cytoskeleton;desmosome;intracellular membrane-bounded organelle;intracellular non-membrane-bounded organelle;intracellular organelle;intracellular part;membrane;membrane-bounded organelle;mitochondrion;non-membrane-bounded organelle;nucleus;organelle;plasma membrane			Plectin	Celljunction;Cellmembrane;Coiledcoil;Completeproteome;Cytoplasm;Cytoskeleton;Keratinization;Membrane;Mitochondrion;Nucleus;Phosphoprotein;Polymorphism;Referenceproteome;Repeat
6753	5	5	26.1	32.583	0	122.35	1918300000	57	Q9Y624;Q9Y624-2	Q9Y624;Q9Y624-2	Junctional adhesion molecule A	ENSG00000158769	F11R	-2.96007	+	0	4.34528	-1.78775	28.6872	28.4999	28.5678	25.3442	25.6966	25.8338	biological adhesion;biological regulation;blood coagulation;cell adhesion;cell differentiation;cell junction assembly;cell junction organization;cell migration;cell motility;cell surface receptor linked signaling pathway;cell-cell junction assembly;cell-cell junction organization;cellular component assembly;cellular component assembly at cellular level;cellular component movement;cellular compone…		cell junction;cell part;cell-cell junction;integral to membrane;intrinsic to membrane;membrane;membrane part;occluding junction;plasma membrane;tight junction	Cell adhesion molecules (CAMs);Epithelial cell signaling in Helicobacter pylori infection;Leukocyte transendothelial migration;Tight junction	ITAGV-ITGB3-F11R complex;ITGA2B-ITGB3-F11R complex	V-set	3D-structure;Celljunction;Cellmembrane;Completeproteome;Directproteinsequencing;Disulfidebond;Glycoprotein;Host-virusinteraction;Immunoglobulindomain;Membrane;Phosphoprotein;Referenceproteome;Repeat;Signal;Tightjunction;Transmembrane;Transmembranehelix
5247	17	15	49	59.241	0	109.87	3114200000	102	Q9BTT6;Q9BTT6-2	Q9BTT6	Leucine-rich repeat-containing protein 1	ENSG00000137269	LRRC1	-2.95056	+	0	3.5106	-1.68324	29.2103	29.1074	29.578	25.9343	26.603	26.5067			cell part;cytoplasm;intracellular part;membrane			LRR_1;LRR_4	Alternativesplicing;Coiledcoil;Completeproteome;Cytoplasm;Leucine-richrepeat;Membrane;Polymorphism;Referenceproteome;Repeat
41	3	3	2.1	190.97	0.001266	2.3737	225940000	15	A7KAX9-2;A7KAX9	A7KAX9-2;A7KAX9	Rho GTPase-activating protein 32	ENSG00000134909	ARHGAP32	-2.89498	+	0	1.83209	-1.5605	NaN	27.2925	26.6803	23.9112	24.2716	NaN	biological regulation;cellular process;cellular response to stimulus;intracellular signal transduction;positive regulation of catalytic activity;positive regulation of GTPase activity;positive regulation of hydrolase activity;positive regulation of molecular function;regulation of biological process;regulation of catabolic process;regulation of catalytic activity;regulation of cellular catabolic …	binding;enzyme activator activity;enzyme regulator activity;GTPase activator activity;GTPase regulator activity;lipid binding;nucleoside-triphosphatase regulator activity;phosphatidylinositol binding;phospholipid binding	actin cytoskeleton;cell cortex;cell junction;cell part;cytoplasmic part;cytoskeletal part;cytoskeleton;cytosol;endoplasmic reticulum membrane;endoplasmic reticulum part;endosomal part;endosome membrane;Golgi apparatus part;Golgi membrane;intracellular non-membrane-bounded organelle;intracellular organelle;intracellular organelle part;intracellular part;membrane;membrane part;non-membrane-bounded …			PX;RhoGAP;SH3_1	3D-structure;Alternativesplicing;Celljunction;Cellmembrane;Cellprojection;Completeproteome;Cytoplasm;Endoplasmicreticulum;Endosome;Golgiapparatus;GTPaseactivation;Membrane;Phosphoprotein;Postsynapticcellmembrane;Referenceproteome;SH3domain;Synapse
1647	25	22	38.8	77.942	0	94.685	5529500000	193	P33121;P33121-2;P33121-3;Q9UKU0-7	P33121;P33121-2;P33121-3	Long-chain-fatty-acid--CoA ligase 1	ENSG00000151726	ACSL1	-2.83221	+	0	5.61443	-1.80221	30.2613	30.1141	30.2826	27.4648	27.3972	27.2993	acyl-CoA biosynthetic process;acyl-CoA metabolic process;acylglycerol biosynthetic process;acylglycerol metabolic process;adiponectin-mediated signaling pathway;biological regulation;biosynthetic process;carboxylic acid metabolic process;catabolic process;cell surface receptor linked signaling pathway;cellular biosynthetic process;cellular catabolic process;cellular ketone metabolic process;cellu…	adenyl nucleotide binding;adenyl ribonucleotide binding;ATP binding;binding;catalytic activity;fatty acid ligase activity;ligase activity;ligase activity, forming carbon-sulfur bonds;long-chain fatty acid-CoA ligase activity;nucleotide binding;purine nucleotide binding;purine ribonucleoside triphosphate binding;purine ribonucleotide binding;ribonucleotide binding	cell part;cytoplasmic part;endoplasmic reticulum membrane;endoplasmic reticulum part;integral to membrane;intracellular membrane-bounded organelle;intracellular organelle;intracellular organelle part;intracellular part;intrinsic to membrane;membrane;membrane part;membrane-bounded organelle;microbody;microbody membrane;microbody part;mitochondrial membrane;mitochondrial outer membrane;mitochondria…	Adipocytokine signaling pathway;Fatty acid metabolism;Peroxisome;PPAR signaling pathway		AMP-binding	Acetylation;Alternativesplicing;ATP-binding;Completeproteome;Directproteinsequencing;Endoplasmicreticulum;Fattyacidmetabolism;Ligase;Lipidmetabolism;Magnesium;Membrane;Microsome;Mitochondrion;Mitochondrionoutermembrane;Nitration;Nucleotide-binding;Peroxisome;Phosphoprotein;Referenceproteome;Signal-anchor;Transmembrane;Transmembranehelix
2156	6	6	46.2	21.994	0	63.597	2786300000	65	P55957;P55957-2;P55957-4;P55957-3	P55957;P55957-2;P55957-4	BH3-interacting domain death agonist;BH3-interacting domain death agonist p15;BH3-interacting domain death agonist p13;BH3-interacting domain death agonist p11	ENSG00000015475	BID	-2.82417	+	0	1.98362	-1.33208	29.5204	28.2985	29.4554	25.882	27.2147	25.7051	anatomical structure development;apoptosis;apoptotic mitochondrial changes;biological regulation;brain development;cell death;cellular component assembly;cellular component organization;cellular component organization at cellular level;cellular component organization or biogenesis;cellular component organization or biogenesis at cellular level;cellular membrane organization;cellular process;death…	binding;cytokine receptor binding;death receptor binding;protein binding;receptor binding;tumor necrosis factor receptor superfamily binding	cell part;cytoplasmic part;cytosol;integral to membrane;integral to mitochondrial membrane;integral to organelle membrane;intracellular organelle part;intracellular part;intrinsic to membrane;intrinsic to organelle membrane;membrane;membrane part;mitochondrial membrane;mitochondrial membrane part;mitochondrial outer membrane;mitochondrial part;organelle membrane;organelle outer membrane;organelle…	Alzheimer's disease;Amyotrophic lateral sclerosis (ALS);Apoptosis;ko05152;Natural killer cell mediated cytotoxicity;p53 signaling pathway;Pathways in cancer;Viral myocarditis	tBID-BCL2 complex;tBID-BCL2xL complex	BID	3D-structure;Alternativesplicing;Apoptosis;Completeproteome;Cytoplasm;Membrane;Mitochondrion;Phosphoprotein;Polymorphism;Referenceproteome;Ublconjugation
2902	11	11	30.8	63.922	0	47.303	1851700000	82	Q14534	Q14534	Squalene monooxygenase	ENSG00000104549	SQLE	-2.80746	+	0	2.95478	-1.52991	28.6372	28.5412	27.908	25.2151	25.419	26.03	alcohol metabolic process;biosynthetic process;cellular aromatic compound metabolic process;cellular metabolic process;cellular process;cholesterol biosynthetic process;cholesterol metabolic process;lipid biosynthetic process;lipid metabolic process;metabolic process;primary metabolic process;response to chemical stimulus;response to organic substance;response to stimulus;small molecule metabolic…	binding;catalytic activity;coenzyme binding;cofactor binding;flavin adenine dinucleotide binding;monooxygenase activity;oxidoreductase activity;oxidoreductase activity, acting on paired donors, with incorporation or reduction of molecular oxygen;squalene monooxygenase activity	cell part;cytoplasmic part;endoplasmic reticulum membrane;endoplasmic reticulum part;integral to membrane;intracellular organelle part;intracellular part;intrinsic to membrane;membrane;membrane part;organelle membrane;organelle part	Steroid biosynthesis		Pyr_redox;SE	Completeproteome;Endoplasmicreticulum;FAD;Flavoprotein;Membrane;Microsome;NADP;Oxidoreductase;Referenceproteome;Transmembrane;Transmembranehelix
1505	11	1	13.6	100.45	0	25.013	12566000000	46	P26232-2;P26232-5;P26232;P26232-3;P26232-4;P26232-6	P26232-2;P26232-5;P26232;P26232-3	Catenin alpha-2	ENSG00000066032	CTNNA2	-2.72321	+	0.000334405	1.50962	-1.16675	31.5783	29.792	32.644	28.7271	28.5839	28.5338	anatomical structure morphogenesis;axonogenesis;biological adhesion;biological regulation;brain morphogenesis;cell adhesion;cell differentiation;cell migration;cell migration in hindbrain;cell motility;cell part morphogenesis;cell projection morphogenesis;cell projection organization;cell-cell adhesion;cellular component morphogenesis;cellular component movement;cellular component organization;ce…	structural constituent of cytoskeleton;structural molecule activity	actin cytoskeleton;adherens junction;anchoring junction;axon;basolateral plasma membrane;cell junction;cell part;cell projection;cell-cell adherens junction;cell-cell junction;cytoplasmic part;cytoskeleton;cytosol;intracellular non-membrane-bounded organelle;intracellular organelle;intracellular part;lamellipodium;membrane part;neuron projection;non-membrane-bounded organelle;organelle;plasma mem…	Adherens junction;Arrhythmogenic right ventricular cardiomyopathy (ARVC);Bacterial invasion of epithelial cells;Endometrial cancer;Leukocyte transendothelial migration;Pathways in cancer;Tight junction		Vinculin	Acetylation;Alternativesplicing;Celladhesion;Celljunction;Cellmembrane;Cellprojection;Completeproteome;Cytoplasm;Cytoskeleton;Developmentalprotein;Differentiation;Membrane;Phosphoprotein;Referenceproteome
4330	24	10	20.1	196.37	0	67.065	1339400000	69	Q8NI35;Q8NI35-4;Q8NI35-3;Q8NI35-2	Q8NI35;Q8NI35-4;Q8NI35-3;Q8NI35-2	InaD-like protein	ENSG00000132849	INADL	-2.70365	+	0	2.31126	-1.36557	27.939	27.5841	28.6061	25.9154	24.6358	25.467	biological regulation;cell junction assembly;cell junction organization;cell-cell junction assembly;cell-cell junction organization;cellular component assembly;cellular component assembly at cellular level;cellular component organization;cellular component organization at cellular level;cellular component organization or biogenesis;cellular component organization or biogenesis at cellular level;c…		apical plasma membrane;cell junction;cell part;cell-cell junction;cytoplasmic part;intracellular part;membrane;membrane part;occluding junction;perinuclear region of cytoplasm;plasma membrane;plasma membrane part;tight junction	Tight junction	CRB1-MPP5-INADL complex;RICH1/AMOT polarity complex, Flag-Amot precipitated;RICH1/AMOT polarity complex, Flag-Rich1 precipitated	L27_2;PDZ	3D-structure;Alternativesplicing;Celljunction;Cellmembrane;Completeproteome;Cytoplasm;Membrane;Phosphoprotein;Polymorphism;Referenceproteome;Repeat;Tightjunction
2172	5	5	29.2	17.871	0	14.475	1087800000	59	P56556	P56556	NADH dehydrogenase [ubiquinone] 1 alpha subcomplex subunit 6	ENSG00000184983;ENSG00000262894	NDUFA6	-2.69714	+	0	2.21387	-1.34222	27.5445	27.9766	27.4542	24.0108	25.2846	25.5885	cellular metabolic process;cellular process;electron transport chain;generation of precursor metabolites and energy;metabolic process;mitochondrial electron transport, NADH to ubiquinone;oxidation-reduction process;respiratory electron transport chain;response to chemical stimulus;response to oxidative stress;response to stimulus;response to stress;small molecule metabolic process	catalytic activity;NADH dehydrogenase (quinone) activity;NADH dehydrogenase (ubiquinone) activity;NADH dehydrogenase activity;oxidoreductase activity;oxidoreductase activity, acting on NADH or NADPH;oxidoreductase activity, acting on NADH or NADPH, quinone or similar compound as acceptor	cell part;cytoplasmic part;intracellular organelle part;intracellular part;macromolecular complex;membrane part;mitochondrial membrane part;mitochondrial part;mitochondrial respiratory chain complex I;NADH dehydrogenase complex;organelle part;protein complex;respiratory chain complex I	Alzheimer's disease;Huntington's disease;Oxidative phosphorylation;Parkinson's disease	Respiratory chain complex I (early intermediate NDUFAF1 assembly), mitochondrial;Respiratory chain complex I (gamma subunit) mitochondrial;Respiratory chain complex I (holoenzyme), mitochondrial;Respiratory chain complex I (intermediate VII/650kD), mitochondrial	Complex1_LYR	Completeproteome;Electrontransport;Membrane;Mitochondrion;Mitochondrioninnermembrane;Polymorphism;Referenceproteome;Respiratorychain;Transport
3554	14	13	23.2	90.246	0	39.727	1195300000	40	Q6NSJ5	Q6NSJ5	Volume-regulated anion channel subunit LRRC8E	ENSG00000171017	LRRC8E	-2.68921	+	0	2.65347	-1.51688	27.8942	28.4289	28.5933	25.6367	NaN	25.5958			cell part;integral to membrane;intrinsic to membrane;membrane part			DUF3733;LRR_4	Completeproteome;Glycoprotein;Leucine-richrepeat;Membrane;Polymorphism;Referenceproteome;Repeat;Transmembrane;Transmembranehelix
4259	17	16	29.9	71.158	0	93.791	2880400000	111	Q8NCL4	Q8NCL4	Polypeptide N-acetylgalactosaminyltransferase 6	ENSG00000139629	GALNT6	-2.67484	+	0	3.85504	-1.58529	29.5622	29.3437	29.9683	26.985	26.9943	26.8703	carbohydrate metabolic process;cellular carbohydrate metabolic process;cellular macromolecule metabolic process;cellular metabolic process;cellular process;cellular protein metabolic process;glycosylation;macromolecule glycosylation;macromolecule metabolic process;macromolecule modification;metabolic process;O-glycan processing;post-translational protein modification;primary metabolic process;pro…	acetylgalactosaminyltransferase activity;catalytic activity;polypeptide N-acetylgalactosaminyltransferase activity;transferase activity;transferase activity, transferring glycosyl groups;transferase activity, transferring hexosyl groups;UDP-glycosyltransferase activity	cell part;cytoplasmic part;Golgi apparatus part;Golgi membrane;integral to membrane;intracellular organelle part;intracellular part;intrinsic to membrane;membrane;membrane part;organelle membrane;organelle part;perinuclear region of cytoplasm	Mucin type O-Glycan biosynthesis		Glycos_transf_2;Ricin_B_lectin	Calcium;Completeproteome;Disulfidebond;Glycoprotein;Glycosyltransferase;Golgiapparatus;Lectin;Manganese;Membrane;Polymorphism;Referenceproteome;Signal-anchor;Transferase;Transmembrane;Transmembranehelix
6446	41	1	44.8	148.66	0	196.3	6217300000	243	Q9UM54-6	Q9UM54-6	Unconventional myosin-VI	ENSG00000196586	MYO6	-2.6428	+	0	3.91172	-1.57402	30.3566	29.9273	30.0173	27.6532	27.4871	27.2325	actin filament-based movement;actin filament-based process;anatomical structure development;anatomical structure morphogenesis;auditory receptor cell differentiation;behavior;biological regulation;cell communication;cell differentiation;cell projection organization;cell-cell signaling;cellular component assembly;cellular component assembly at cellular level;cellular component movement;cellular co…	actin binding;actin filament binding;adenyl nucleotide binding;adenyl ribonucleotide binding;ADP binding;ATP binding;binding;calmodulin binding;catalytic activity;cytoskeletal protein binding;hydrolase activity;hydrolase activity, acting on acid anhydrides;hydrolase activity, acting on acid anhydrides, in phosphorus-containing anhydrides;microfilament motor activity;minus-end directed microfilame…	axon;cell body;cell cortex;cell part;cell projection;cell projection membrane;cell projection part;clathrin coated vesicle membrane;coated pit;coated vesicle membrane;cytoplasmic membrane-bounded vesicle;cytoplasmic part;cytoplasmic vesicle;cytoplasmic vesicle membrane;cytoplasmic vesicle part;cytoskeletal part;cytosol;DNA-directed RNA polymerase II, holoenzyme;filamentous actin;Golgi apparatus;i…			Myosin_head	Actin-binding;Alternativesplicing;ATP-binding;Calmodulin-binding;Cellmembrane;Cellprojection;Coatedpit;Coiledcoil;Completeproteome;Cytoplasm;Cytoplasmicvesicle;Deafness;Diseasemutation;Endocytosis;Golgiapparatus;Hearing;Membrane;Motorprotein;Myosin;Non-syndromicdeafness;Nucleotide-binding;Nucleus;Phosphoprotein;Proteintransport;Referenceproteome;Transport
2501	12	12	51	38.157	0	117.91	2399700000	105	Q02338	Q02338	D-beta-hydroxybutyrate dehydrogenase, mitochondrial	ENSG00000161267	BDH1	-2.63279	+	0	3.63287	-1.53965	29.4069	28.7165	28.9538	26.4848	26.293	26.401	adipose tissue development;anatomical structure development;biosynthetic process;brain development;catabolic process;cellular biosynthetic process;cellular catabolic process;cellular ketone body metabolic process;cellular lipid metabolic process;cellular metabolic process;cellular process;developmental process;ketone body biosynthetic process;ketone body catabolic process;lipid metabolic process;…	3-hydroxybutyrate dehydrogenase activity;binding;catalytic activity;lipid binding;oxidoreductase activity;oxidoreductase activity, acting on CH-OH group of donors;oxidoreductase activity, acting on the CH-OH group of donors, NAD or NADP as acceptor;phospholipid binding	cell part;cytoplasmic part;intracellular membrane-bounded organelle;intracellular organelle;intracellular organelle lumen;intracellular organelle part;intracellular part;membrane;membrane-bounded organelle;membrane-enclosed lumen;mitochondrial inner membrane;mitochondrial matrix;mitochondrial membrane;mitochondrial part;nucleus;organelle;organelle inner membrane;organelle lumen;organelle membrane…	Butanoate metabolism;Synthesis and degradation of ketone bodies		adh_short	Acetylation;Allostericenzyme;Completeproteome;Mitochondrion;NAD;Oxidoreductase;Referenceproteome;Transitpeptide
6781	4	4	33.8	15.512	0	69.501	4418500000	71	Q9Y6H1;Q5T1J5	Q9Y6H1;Q5T1J5	Coiled-coil-helix-coiled-coil-helix domain-containing protein 2;Putative coiled-coil-helix-coiled-coil-helix domain-containing protein CHCHD2P9, mitochondrial	ENSG00000106153	CHCHD2;CHCHD2P9	-2.61611	+	0	3.04458	-1.45679	30.7413	30.7582	29.9218	28.07	27.7624	27.7405			cell part;cytoplasmic part;intracellular membrane-bounded organelle;intracellular organelle;intracellular part;membrane-bounded organelle;mitochondrion;organelle			CHCH	Completeproteome;Disulfidebond;Mitochondrion;Phosphoprotein;Polymorphism;Referenceproteome;Transitpeptide
4448	7	7	12.7	73.699	0	15.487	531710000	29	Q8WUM9	Q8WUM9	Sodium-dependent phosphate transporter 1	ENSG00000144136	SLC20A1	-2.61564	+	0	2.87803	-1.51844	26.6498	27.0676	27.2117	NaN	24.4239	24.2975	biological regulation;cellular metabolic process;cellular process;metabolic process;phosphate-containing compound metabolic process;phosphorus metabolic process;positive regulation of biological process;positive regulation of cell communication;positive regulation of cellular process;positive regulation of I-kappaB kinase/NF-kappaB cascade;positive regulation of intracellular protein kinase casca…	active transmembrane transporter activity;anion transmembrane transporter activity;anion:cation symporter activity;cation transmembrane transporter activity;high affinity inorganic phosphate:sodium symporter activity;inorganic anion transmembrane transporter activity;inorganic cation transmembrane transporter activity;inorganic phosphate transmembrane transporter activity;ion transmembrane transp…	cell part;integral to membrane;integral to plasma membrane;intrinsic to membrane;intrinsic to plasma membrane;membrane part;plasma membrane part			PHO4	Completeproteome;Membrane;Phosphatetransport;Phosphoprotein;Receptor;Referenceproteome;Symport;Transmembrane;Transmembranehelix;Transport
979	19	3	53.7	40.84	0	323.31	62697000000	849	P04439;P30455;P30443	P04439;P30455;P30443	HLA class I histocompatibility antigen, A-3 alpha chain;HLA class I histocompatibility antigen, A-36 alpha chain;HLA class I histocompatibility antigen, A-1 alpha chain	ENSG00000206503;ENSG00000224320;ENSG00000229215	HLA-A	-2.60376	+	0	4.68077	-1.61446	33.9676	33.7931	33.6697	31.3444	31.0991	31.1756	antigen processing and presentation;antigen processing and presentation of exogenous antigen;antigen processing and presentation of exogenous peptide antigen;antigen processing and presentation of exogenous peptide antigen via MHC class I;antigen processing and presentation of exogenous peptide antigen via MHC class I, TAP-dependent;antigen processing and presentation of exogenous peptide antigen…		cell part;coated vesicle membrane;cytoplasmic part;cytoplasmic vesicle membrane;cytoplasmic vesicle part;early endosome membrane;endocytic vesicle membrane;endoplasmic reticulum part;endosomal part;endosome membrane;ER to Golgi transport vesicle membrane;Golgi apparatus part;Golgi membrane;integral to endoplasmic reticulum membrane;integral to lumenal side of endoplasmic reticulum membrane;integr…	Allograft rejection;Antigen processing and presentation;Autoimmune thyroid disease;Cell adhesion molecules (CAMs);Endocytosis;Graft-versus-host disease;Natural killer cell mediated cytotoxicity;Phagosome;Type I diabetes mellitus;Viral myocarditis		C1-set;MHC_I;MHC_I_C	3D-structure;Completeproteome;Disulfidebond;Glycoprotein;Host-virusinteraction;Immunity;Immunoglobulindomain;Membrane;MHCI;Phosphoprotein;Polymorphism;Referenceproteome;Signal;Sulfation;Transmembrane;Transmembranehelix;Ublconjugation
554	4	4	38.3	15.139	0	17.449	1122700000	43	O60783	O60783	28S ribosomal protein S14, mitochondrial	ENSG00000120333	MRPS14	-2.59208	+	0.000474886	2.22728	-1.30556	26.7102	28.1176	27.4909	24.412	25.3249	24.8055	biosynthetic process;cellular biosynthetic process;cellular macromolecule biosynthetic process;cellular macromolecule metabolic process;cellular metabolic process;cellular process;cellular protein metabolic process;macromolecule biosynthetic process;macromolecule metabolic process;metabolic process;primary metabolic process;protein metabolic process;translation	structural constituent of ribosome;structural molecule activity	cell part;cytoplasmic part;intracellular non-membrane-bounded organelle;intracellular organelle;intracellular organelle part;intracellular part;macromolecular complex;membrane;mitochondrial part;mitochondrial ribosome;non-membrane-bounded organelle;nuclear membrane;nuclear part;organellar ribosome;organelle;organelle membrane;organelle part;ribonucleoprotein complex;ribosome		28S ribosomal subunit, mitochondrial;55S ribosome, mitochondrial	Ribosomal_S14	Completeproteome;Mitochondrion;Referenceproteome;Ribonucleoprotein;Ribosomalprotein
965	20	16	42.9	73.051	0	182.08	3325500000	133	P04049;P04049-2;P15056	P04049;P04049-2	RAF proto-oncogene serine/threonine-protein kinase	ENSG00000132155	RAF1	-2.56674	+	0	2.86535	-1.49178	26.8563	26.5989	26.7788	23.9131	24.4428	NaN	activation of adenylate cyclase activity;activation of MAPKK activity;activation of protein kinase activity;anatomical structure development;axon guidance;biological regulation;cell activation;cell communication;cell proliferation;cell surface receptor linked signaling pathway;cell-cell signaling;cellular component organization;cellular component organization at cellular level;cellular component …	adenyl nucleotide binding;adenyl ribonucleotide binding;ATP binding;binding;catalytic activity;cation binding;ion binding;kinase activity;MAP kinase kinase kinase activity;metal ion binding;molecular transducer activity;nucleotide binding;phosphotransferase activity, alcohol group as acceptor;protein kinase activity;protein serine/threonine kinase activity;purine nucleotide binding;purine ribonuc…	cell part;cell projection;cytoplasmic part;cytosol;intracellular membrane-bounded organelle;intracellular organelle;intracellular organelle part;intracellular part;membrane;membrane-bounded organelle;mitochondrial membrane;mitochondrial outer membrane;mitochondrial part;nucleus;organelle;organelle membrane;organelle outer membrane;organelle part;outer membrane;plasma membrane;pseudopodium	Acute myeloid leukemia;B cell receptor signaling pathway;Bladder cancer;Chemokine signaling pathway;Chronic myeloid leukemia;Colorectal cancer;Endometrial cancer;ErbB signaling pathway;Fc epsilon RI signaling pathway;Fc gamma R-mediated phagocytosis;Focal adhesion;Gap junction;Glioma;GnRH signaling pathway;Hepatitis C;Insulin signaling pathway;ko05152;Long-term depression;Long-term potentiation;M…	BRAF-RAF1-14-3-3 complex;CNK1-SRC-RAF1 complex;G protein complex (GNG2, GNB2L1, RAF1);KSR1-RAF1-MEK complex;MAP2K1-BRAF-RAF1-YWHAE-KSR1 complex;RAF1-BRAF complex, RAS stimulated;RAF1-CNK1 complex, RAS stimulated;RAF1-MAP2K1-YWHAE complex;RAF1-PPP2-PIN1 complex;RAF1-RAS complex, EGF induced	C1_1;Pkinase_Tyr;RBD	3D-structure;Alternativesplicing;ATP-binding;Cellmembrane;Completeproteome;Cytoplasm;Deafness;Directproteinsequencing;Diseasemutation;Kinase;Membrane;Metal-binding;Methylation;Mitochondrion;Nucleotide-binding;Nucleus;Phosphoprotein;Polymorphism;Proto-oncogene;Referenceproteome;Serine/threonine-proteinkinase;Transferase;Zinc;Zinc-finger
584	14	14	16.5	135.19	0	31.585	1339400000	43	O75054;O75054-2	O75054;O75054-2	Immunoglobulin superfamily member 3	ENSG00000143061	IGSF3	-2.56632	+	0	2.78909	-1.39579	28.5934	28.2218	28.7396	26.3037	26.2003	25.3519			cell part;integral to membrane;intrinsic to membrane;membrane part			V-set	Alternativesplicing;Chromosomalrearrangement;Completeproteome;Disulfidebond;Glycoprotein;Immunoglobulindomain;Membrane;Polymorphism;Referenceproteome;Repeat;Signal;Transmembrane;Transmembranehelix
1059	10	10	41	37.821	0	163.37	8827400000	207	P07858	P07858	Cathepsin B;Cathepsin B light chain;Cathepsin B heavy chain	ENSG00000164733	CTSB	-2.54827	+	0	4.76553	-1.58762	30.9932	30.8622	31.06	28.2507	28.5347	28.4852	activation of immune response;activation of innate immune response;biological regulation;cellular component disassembly;cellular component disassembly at cellular level;cellular component organization;cellular component organization at cellular level;cellular component organization or biogenesis;cellular component organization or biogenesis at cellular level;cellular process;cellular response to …	catalytic activity;cysteine-type endopeptidase activity;cysteine-type peptidase activity;endopeptidase activity;hydrolase activity;peptidase activity;peptidase activity, acting on L-amino acid peptides	cell part;cytoplasmic membrane-bounded vesicle;cytoplasmic part;cytoplasmic vesicle;extracellular region part;extracellular space;intracellular membrane-bounded organelle;intracellular non-membrane-bounded organelle;intracellular organelle;intracellular organelle part;intracellular part;melanosome;membrane-bounded organelle;membrane-bounded vesicle;mitochondrion;non-membrane-bounded organelle;nuc…	Antigen processing and presentation;Lysosome		Peptidase_C1;Propeptide_C1	3D-structure;Completeproteome;Directproteinsequencing;Disulfidebond;Glycoprotein;Hydrolase;Lysosome;Polymorphism;Protease;Referenceproteome;Secreted;Signal;Thiolprotease;Zymogen
3702	12	12	38.1	47.752	0	41.058	1765300000	85	Q6YP21-3;Q6YP21;Q6YP21-2	Q6YP21-3;Q6YP21	Kynurenine--oxoglutarate transaminase 3	ENSG00000137944	CCBL2	-2.53556	+	0	3.30582	-1.45278	28.2807	28.4888	28.3812	26.3205	25.5636	25.6601	2-oxoglutarate metabolic process;amine catabolic process;amine metabolic process;aromatic amino acid family catabolic process;aromatic amino acid family metabolic process;aromatic compound catabolic process;biosynthetic process;carboxylic acid catabolic process;carboxylic acid metabolic process;catabolic process;cellular amine metabolic process;cellular amino acid catabolic process;cellular amino…	binding;carbon-sulfur lyase activity;catalytic activity;cofactor binding;cysteine-S-conjugate beta-lyase activity;kynurenine-glyoxylate transaminase activity;kynurenine-oxoglutarate transaminase activity;lyase activity;pyridoxal phosphate binding;transaminase activity;transferase activity;transferase activity, transferring nitrogenous groups;vitamin B6 binding;vitamin binding	cell part;cytoplasmic part;intracellular membrane-bounded organelle;intracellular organelle;intracellular part;membrane-bounded organelle;mitochondrion;organelle	Selenocompound metabolism;Tryptophan metabolism		Aminotran_1_2	Acetylation;Alternativesplicing;Aminotransferase;Completeproteome;Lyase;Polymorphism;Pyridoxalphosphate;Referenceproteome;Transferase
6584	15	15	37.8	62.045	0	60.058	1843800000	89	Q9Y2W6;Q9Y2W6-3	Q9Y2W6;Q9Y2W6-3	Tudor and KH domain-containing protein	ENSG00000182134	TDRKH	-2.52555	+	0	5.28871	-1.60152	28.9931	28.8334	28.7771	26.4088	26.3528	26.2654		binding;nucleic acid binding;RNA binding	cell part;cytoplasmic part;intracellular membrane-bounded organelle;intracellular organelle;intracellular part;membrane-bounded organelle;mitochondrion;organelle			KH_1;TUDOR	3D-structure;Alternativesplicing;Completeproteome;Cytoplasm;Differentiation;Mitochondrion;Polymorphism;Referenceproteome;Repeat;RNA-binding;RNA-mediatedgenesilencing;Spermatogenesis
6108	33	33	44.5	107.23	0	130.14	7187000000	278	Q9NZ08;Q9NZ08-2	Q9NZ08;Q9NZ08-2	Endoplasmic reticulum aminopeptidase 1	ENSG00000164307	ERAP1	-2.46877	+	0	4.52242	-1.52656	30.2046	30.1396	30.4437	27.7185	27.9378	27.7252	anatomical structure formation involved in morphogenesis;angiogenesis;antigen processing and presentation;antigen processing and presentation of endogenous antigen;antigen processing and presentation of endogenous peptide antigen;antigen processing and presentation of endogenous peptide antigen via MHC class I;antigen processing and presentation of peptide antigen;antigen processing and presentat…	aminopeptidase activity;binding;catalytic activity;cation binding;cytokine receptor binding;exopeptidase activity;growth factor receptor binding;hydrolase activity;interleukin-1 receptor binding;interleukin-1, Type II receptor binding;ion binding;metal ion binding;metalloexopeptidase activity;metallopeptidase activity;peptidase activity;peptidase activity, acting on L-amino acid peptides;protein …	cell part;cytoplasmic part;cytosol;endoplasmic reticulum lumen;endoplasmic reticulum membrane;endoplasmic reticulum part;extracellular region;integral to membrane;intracellular organelle lumen;intracellular organelle part;intracellular part;intrinsic to membrane;membrane;membrane part;membrane-enclosed lumen;organelle lumen;organelle membrane;organelle part		ERAP1-ERAP2 complex	DUF3358;Peptidase_M1	3D-structure;Adaptiveimmunity;Alternativesplicing;Aminopeptidase;Completeproteome;Directproteinsequencing;Disulfidebond;Endoplasmicreticulum;Glycoprotein;Hydrolase;Immunity;Membrane;Metal-binding;Metalloprotease;Polymorphism;Protease;Referenceproteome;Signal-anchor;Transmembrane;Transmembranehelix;Zinc
6506	22	22	54.5	59.013	0	286.59	8752500000	250	Q9UQB8-2;Q9UQB8;Q9UQB8-3;Q9UQB8-5;Q9UQB8-4;Q9UQB8-6	Q9UQB8-2;Q9UQB8;Q9UQB8-3;Q9UQB8-5;Q9UQB8-4;Q9UQB8-6	Brain-specific angiogenesis inhibitor 1-associated protein 2	ENSG00000175866	BAIAP2	-2.46211	+	0	3.85216	-1.47195	29.5642	29.7068	29.9581	27.5357	27.1219	27.1852	actin crosslink formation;actin cytoskeleton organization;actin filament bundle assembly;actin filament organization;actin filament-based process;anatomical structure development;anatomical structure morphogenesis;axonogenesis;biological regulation;cell part morphogenesis;cell projection assembly;cell projection morphogenesis;cell projection organization;cell surface receptor linked signaling pat…	binding;binding, bridging;cytoskeletal adaptor activity;cytoskeletal protein binding;proline-rich region binding;protein binding;protein binding, bridging;protein C-terminus binding	cell junction;cell part;cell projection;cytoplasmic part;cytoskeleton;cytosol;filopodium;intracellular membrane-bounded organelle;intracellular non-membrane-bounded organelle;intracellular organelle;intracellular part;membrane;membrane-bounded organelle;neuron projection;non-membrane-bounded organelle;nucleus;organelle;plasma membrane;ruffle	Adherens junction;Regulation of actin cytoskeleton		IMD;SH3_2	3D-structure;Alternativesplicing;Cellprojection;Coiledcoil;Completeproteome;Cytoplasm;Cytoskeleton;Membrane;Phosphoprotein;Polymorphism;Referenceproteome;SH3domain
5125	33	33	50.5	92.755	0	323.31	10519000000	358	Q99959-2;Q99959	Q99959-2;Q99959	Plakophilin-2	ENSG00000057294	PKP2	-2.43488	+	0	4.57543	-1.51037	30.8792	31.0007	31.1028	28.674	28.6258	28.3782	adherens junction maintenance;adherens junction organization;anatomical structure morphogenesis;biological adhesion;biological regulation;cardiac muscle tissue morphogenesis;cell adhesion;cell junction assembly;cell junction maintenance;cell junction organization;cell-cell adhesion;cell-cell junction assembly;cell-cell junction organization;cellular component assembly;cellular component assembly …	binding;channel regulator activity;intermediate filament binding;ion channel binding;protein binding;protein complex binding;protein complex scaffold;sodium channel regulator activity;structural molecule activity	adherens junction;anchoring junction;cell junction;cell part;cell-cell contact zone;cell-cell junction;cytoskeletal part;desmosome;integral to membrane;intercalated disc;intermediate filament;intracellular membrane-bounded organelle;intracellular organelle;intracellular organelle part;intracellular part;intrinsic to membrane;macromolecular complex;membrane;membrane part;membrane-bounded organelle…	Arrhythmogenic right ventricular cardiomyopathy (ARVC)		Arm	3D-structure;Alternativesplicing;Cardiomyopathy;Celladhesion;Celljunction;Completeproteome;Diseasemutation;Nucleus;Phosphoprotein;Referenceproteome;Repeat
4958	7	7	21.4	52.764	0	65.303	3742900000	114	Q96N66;Q96N66-3;Q96N66-2	Q96N66;Q96N66-3;Q96N66-2	Lysophospholipid acyltransferase 7	ENSG00000125505;ENSG00000261917;ENSG00000262053;ENSG00000268445;ENSG00000268452;ENSG00000269206;ENSG00000269409;ENSG00000269585;ENSG00000269708	MBOAT7	-2.42048	+	0	3.84067	-1.4486	29.5717	29.5512	29.0886	27.1025	26.8753	26.9722	anatomical structure development;biosynthetic process;cellular biosynthetic process;cellular lipid metabolic process;cellular metabolic process;cellular process;developmental process;glycerolipid biosynthetic process;glycerolipid metabolic process;glycerophospholipid biosynthetic process;glycerophospholipid metabolic process;lipid biosynthetic process;lipid metabolic process;metabolic process;org…	catalytic activity;transferase activity;transferase activity, transferring acyl groups;transferase activity, transferring acyl groups other than amino-acyl groups	cell part;cytoplasmic part;endoplasmic reticulum membrane;endoplasmic reticulum part;integral to membrane;intracellular organelle part;intracellular part;intrinsic to membrane;membrane;membrane part;organelle membrane;organelle part	Glycerophospholipid metabolism		MBOAT	Acyltransferase;Alternativesplicing;Completeproteome;Glycoprotein;Lipidbiosynthesis;Lipidmetabolism;Membrane;Phospholipidbiosynthesis;Phospholipidmetabolism;Polymorphism;Referenceproteome;Transferase;Transmembrane;Transmembranehelix
4999	6	6	6.8	128.88	0	10.076	540340000	25	Q96QU8;Q96QU8-2	Q96QU8;Q96QU8-2	Exportin-6	ENSG00000169180	XPO6	-2.42043	+	0.00527759	0.940864	-0.895387	23.5479	27.4301	26.1106	22.9231	22.8577	24.0466	establishment of localization;establishment of localization in cell;establishment of protein localization;intracellular protein transport;intracellular transport;nuclear export;nuclear transport;nucleocytoplasmic transport;protein export from nucleus;protein targeting;protein transport;transport	protein transporter activity;substrate-specific transporter activity;transporter activity	cell part;cytoplasm;intracellular non-membrane-bounded organelle;intracellular organelle;intracellular organelle part;intracellular part;macromolecular complex;membrane;membrane part;non-membrane-bounded organelle;nuclear part;nuclear pore;nucleolus;organelle;organelle part;plasma membrane;pore complex;protein complex			IBN_N;Xpo1	Completeproteome;Cytoplasm;Nucleus;Phosphoprotein;Polymorphism;Proteintransport;Referenceproteome;Transport
3090	12	12	29.8	59.225	0	37.363	1451000000	88	Q15646;Q15646-3;Q15646-2	Q15646;Q15646-3;Q15646-2	2-5-oligoadenylate synthase-like protein	ENSG00000135114	OASL	-2.41835	+	0	3.64184	-1.42939	27.8193	27.8943	27.5957	25.4402	25.0235	25.5906	biological regulation;cell surface receptor linked signaling pathway;cellular process;cellular response to chemical stimulus;cellular response to cytokine stimulus;cellular response to interferon-gamma;cellular response to organic substance;cellular response to stimulus;cellular response to type I interferon;cytokine-mediated signaling pathway;defense response;defense response to virus;immune eff…	adenyl nucleotide binding;adenyl ribonucleotide binding;ATP binding;binding;catalytic activity;DNA binding;double-stranded RNA binding;hormone receptor binding;nuclear hormone receptor binding;nucleic acid binding;nucleotide binding;protein binding;purine nucleotide binding;purine ribonucleoside triphosphate binding;purine ribonucleotide binding;receptor binding;ribonucleotide binding;RNA binding…	cell part;cytoplasmic part;cytosol;intracellular non-membrane-bounded organelle;intracellular organelle;intracellular organelle part;intracellular part;non-membrane-bounded organelle;nuclear part;nucleolus;organelle;organelle part			OAS1_C;ubiquitin	3D-structure;Alternativesplicing;Antiviraldefense;Completeproteome;Cytoplasm;Immunity;Innateimmunity;Nucleus;Polymorphism;Referenceproteome;Repeat;RNA-binding
1829	9	9	34.5	47.485	0	70.427	3258300000	105	P45954;P45954-2	P45954;P45954-2	Short/branched chain specific acyl-CoA dehydrogenase, mitochondrial	ENSG00000196177	ACADSB	-2.38232	+	0	6.16176	-1.54307	29.6213	29.5449	29.6213	27.1607	27.2816	27.1983	amine catabolic process;amine metabolic process;branched chain family amino acid catabolic process;branched chain family amino acid metabolic process;carboxylic acid catabolic process;carboxylic acid metabolic process;catabolic process;cellular amine metabolic process;cellular amino acid catabolic process;cellular amino acid metabolic process;cellular catabolic process;cellular ketone metabolic p…	acyl-CoA dehydrogenase activity;binding;catalytic activity;coenzyme binding;cofactor binding;flavin adenine dinucleotide binding;oxidoreductase activity;oxidoreductase activity, acting on the CH-CH group of donors	cell part;cytoplasmic part;intracellular organelle lumen;intracellular organelle part;intracellular part;membrane-enclosed lumen;mitochondrial matrix;mitochondrial part;organelle lumen;organelle part	Fatty acid metabolism;Valine, leucine and isoleucine degradation		Acyl-CoA_dh_1;Acyl-CoA_dh_M;Acyl-CoA_dh_N	3D-structure;Acetylation;Completeproteome;Diseasemutation;FAD;Fattyacidmetabolism;Flavoprotein;Lipidmetabolism;Mitochondrion;Oxidoreductase;Polymorphism;Referenceproteome;Transitpeptide
3355	11	11	20.8	78.643	0	24.588	605130000	52	Q5K4L6;Q5K4L6-2;Q5K4L6-3	Q5K4L6;Q5K4L6-2;Q5K4L6-3	Long-chain fatty acid transport protein 3	ENSG00000143554;ENSG00000263163	SLC27A3	-2.37814	+	0	3.53933	-1.39856	27.3811	27.6346	27.6058	25.2699	24.8043	25.4129	carboxylic acid metabolic process;cellular ketone metabolic process;cellular lipid metabolic process;cellular metabolic process;cellular process;fatty acid metabolic process;lipid metabolic process;metabolic process;monocarboxylic acid metabolic process;organic acid metabolic process;oxoacid metabolic process;primary metabolic process;small molecule metabolic process	binding;C-acyltransferase activity;catalytic activity;fatty-acyl-CoA synthase activity;ligase activity;nucleotide binding;transferase activity;transferase activity, transferring acyl groups;transferase activity, transferring acyl groups other than amino-acyl groups	cell part;cytoplasmic part;integral to membrane;intracellular organelle part;intracellular part;intrinsic to membrane;membrane;membrane part;mitochondrial membrane;mitochondrial part;organelle membrane;organelle part			AMP-binding	Alternativesplicing;Completeproteome;Fattyacidmetabolism;Ligase;Lipidmetabolism;Membrane;Mitochondrion;Nucleotide-binding;Polymorphism;Referenceproteome;Transmembrane;Transmembranehelix
6253	33	33	40.8	133.96	0	185.42	8611300000	323	Q9UDY2;Q9UDY2-3;Q9UDY2-7;Q9UDY2-6;Q9UDY2-2;Q9UDY2-4;Q9UDY2-5	Q9UDY2;Q9UDY2-3;Q9UDY2-7;Q9UDY2-6;Q9UDY2-2;Q9UDY2-4;Q9UDY2-5	Tight junction protein ZO-2	ENSG00000119139	TJP2	-2.37029	+	0	4.73713	-1.48202	30.3397	30.3261	30.3917	28.1767	27.8917	27.8782	biological regulation;cellular component disassembly;cellular component disassembly at cellular level;cellular component disassembly involved in apoptosis;cellular component organization;cellular component organization at cellular level;cellular component organization or biogenesis;cellular component organization or biogenesis at cellular level;cellular process;cellular response to stimulus;hippo…	catalytic activity;guanylate kinase activity;kinase activity;nucleobase-containing compound kinase activity;nucleotide kinase activity;phosphotransferase activity, phosphate group as acceptor;transferase activity;transferase activity, transferring phosphorus-containing groups	adherens junction;anchoring junction;cell junction;cell part;cell-cell junction;cytoplasmic part;cytosol;intracellular organelle part;intracellular part;membrane;nuclear part;nucleoplasm;occluding junction;organelle part;plasma membrane;tight junction	Tight junction;Vibrio cholerae infection		Guanylate_kin;PDZ;SH3_2	3D-structure;Alternativepromoterusage;Alternativesplicing;Celljunction;Cellmembrane;Completeproteome;Diseasemutation;Membrane;Nucleus;Phosphoprotein;Polymorphism;Referenceproteome;Repeat;SH3domain;Tightjunction
3953	7	7	42	31.642	0	61.247	1374300000	69	Q86Y82	Q86Y82	Syntaxin-12	ENSG00000117758	STX12	-2.3543	+	0	3.69471	-1.40047	28.3122	28.1455	28.5156	25.6969	26.1964	26.017	biological regulation;cellular process;cholesterol efflux;cholesterol transport;establishment of localization;establishment of localization in cell;establishment of protein localization;exocytosis;intracellular protein transport;intracellular transport;lipid transport;organic substance transport;posttranscriptional regulation of gene expression;protein stabilization;protein transport;regulation o…	binding;protein binding;SNAP receptor activity;SNARE binding	cell part;cytoplasmic membrane-bounded vesicle;cytoplasmic part;cytoplasmic vesicle;endocytic vesicle;endosomal part;endosome membrane;Golgi apparatus part;Golgi membrane;integral to membrane;intracellular membrane-bounded organelle;intracellular organelle;intracellular organelle part;intracellular part;intrinsic to membrane;macromolecular complex;membrane;membrane part;membrane raft;membrane-bou…	Phagosome	SNARE complex (HGS, SNAP25, STX13);SNARE complex (SNAP25, VAMP3, VAMP2, NAPB, STX13);SNARE complex (VAMP2, SNAP25, STX13)	SNARE;Syntaxin	3D-structure;Coiledcoil;Completeproteome;Endosome;Golgiapparatus;Membrane;Phosphoprotein;Polymorphism;Proteintransport;Referenceproteome;Transmembrane;Transmembranehelix;Transport
3088	40	40	27.5	227.58	0	106.91	3380300000	161	Q15643	Q15643	Thyroid receptor-interacting protein 11	ENSG00000100815	TRIP11	-2.34899	+	0.000454148	2.71427	-1.28753	29.468	28.5339	29.1826	26.9054	26.8584	26.3738	biosynthetic process;cellular biosynthetic process;cellular macromolecule biosynthetic process;cellular macromolecule metabolic process;cellular metabolic process;cellular nitrogen compound metabolic process;cellular process;establishment of localization;establishment of localization in cell;establishment of protein localization;establishment of protein localization in Golgi;establishment of prot…	protein binding transcription factor activity;transcription coactivator activity;transcription cofactor activity;transcription factor binding transcription factor activity	cell part;cytoplasmic part;cytoskeleton;Golgi apparatus;intracellular membrane-bounded organelle;intracellular non-membrane-bounded organelle;intracellular organelle;intracellular part;membrane;membrane-bounded organelle;non-membrane-bounded organelle;nucleus;organelle				Chromosomalrearrangement;Coiledcoil;Completeproteome;Cytoplasm;Cytoskeleton;Dwarfism;Golgiapparatus;Membrane;Phosphoprotein;Polymorphism;Referenceproteome
1419	15	15	42.4	57.948	0	47.897	2185500000	93	P21589-2;P21589	P21589-2;P21589	5-nucleotidase	ENSG00000135318	NT5E	-2.34882	+	0	3.39496	-1.36912	28.7006	28.8934	29.3772	26.5799	26.795	26.5499	adenosine biosynthetic process;adenosine metabolic process;AMP catabolic process;AMP metabolic process;biological regulation;biosynthetic process;catabolic process;cellular aromatic compound metabolic process;cellular biosynthetic process;cellular catabolic process;cellular macromolecule metabolic process;cellular metabolic process;cellular nitrogen compound biosynthetic process;cellular nitrogen…	5'-nucleotidase activity;binding;catalytic activity;cation binding;hydrolase activity;hydrolase activity, acting on ester bonds;ion binding;metal ion binding;nucleotidase activity;nucleotide binding;phosphatase activity;phosphoric ester hydrolase activity	anchored to membrane;cell part;cytoplasm;extracellular membrane-bounded organelle;extracellular organelle;extracellular region part;extracellular vesicular exosome;intracellular part;intrinsic to membrane;membrane;membrane part;membrane-bounded organelle;membrane-bounded vesicle;organelle;plasma membrane;vesicle	Nicotinate and nicotinamide metabolism;Purine metabolism;Pyrimidine metabolism		5_nucleotid_C;Metallophos	3D-structure;Alternativesplicing;Cellmembrane;Completeproteome;Directproteinsequencing;Diseasemutation;Disulfidebond;Glycoprotein;GPI-anchor;Hydrolase;Lipoprotein;Membrane;Metal-binding;Nucleotide-binding;Polymorphism;Referenceproteome;Signal;Zinc
3188	4	4	30.7	21.438	0	11.774	440280000	20	Q16854-2;Q16854;Q16854-4;Q16854-3;Q16854-5	Q16854-2;Q16854;Q16854-4;Q16854-3;Q16854-5	Deoxyguanosine kinase, mitochondrial	ENSG00000114956	DGUOK	-2.34847	+	0	4.0452	-1.42578	26.8023	26.9767	26.918	24.6439	24.279	24.7287	2'-deoxyribonucleotide metabolic process;biological regulation;biosynthetic process;cellular aromatic compound metabolic process;cellular biosynthetic process;cellular macromolecule metabolic process;cellular metabolic compound salvage;cellular metabolic process;cellular nitrogen compound biosynthetic process;cellular nitrogen compound metabolic process;cellular process;cellular protein metabolic…	adenyl nucleotide binding;adenyl ribonucleotide binding;ATP binding;binding;catalytic activity;deoxyguanosine kinase activity;deoxynucleoside kinase activity;kinase activity;nucleobase-containing compound kinase activity;nucleoside kinase activity;nucleotide binding;phosphotransferase activity, alcohol group as acceptor;purine nucleotide binding;purine ribonucleoside triphosphate binding;purine r…	cell part;cytoplasmic part;cytosol;intracellular organelle lumen;intracellular organelle part;intracellular part;membrane-enclosed lumen;mitochondrial matrix;mitochondrial part;organelle lumen;organelle part	Purine metabolism		dNK	3D-structure;Acetylation;Alternativesplicing;ATP-binding;Completeproteome;Diseasemutation;Kinase;Mitochondrion;Neuropathy;Nucleotide-binding;Referenceproteome;Transferase;Transitpeptide
5318	4	4	33.7	26.261	0	7.2064	578120000	38	Q9BVT8	Q9BVT8	Transmembrane and ubiquitin-like domain-containing protein 1	ENSG00000164897	TMUB1	-2.31578	+	0	5.89954	-1.49442	27.4087	27.4127	27.4394	25.1797	25.0134	25.1204			cell part;cytoplasm;integral to membrane;intracellular membrane-bounded organelle;intracellular organelle;intracellular part;intrinsic to membrane;membrane part;membrane-bounded organelle;nucleus;organelle			ubiquitin	Completeproteome;Cytoplasm;Membrane;Nucleus;Phosphoprotein;Referenceproteome;Transmembrane;Transmembranehelix
2521	4	4	25.3	20.471	0	65.306	17473000000	206	Q03135;Q03135-2;P56539	Q03135;Q03135-2;P56539	Caveolin-1;Caveolin-3	ENSG00000105974;ENSG00000182533	CAV1;CAV3	-2.30773	+	0	3.75324	-1.38062	31.1744	31.1504	31.1154	29.0988	28.5174	28.9007	actin cytoskeleton organization;actin filament organization;actin filament-based process;acylglycerol metabolic process;anatomical structure development;anatomical structure formation involved in morphogenesis;anatomical structure homeostasis;angiogenesis;biological regulation;blood coagulation;body fluid secretion;calcium ion homeostasis;calcium ion transport;carbohydrate homeostasis;cardiac cel…	binding;calcium channel regulator activity;channel regulator activity;cholesterol binding;connexin binding;enzyme activator activity;enzyme regulator activity;lipid binding;peptidase activator activity;peptidase regulator activity;protein binding;protein complex binding;protein complex scaffold;protein C-terminus binding;sodium channel regulator activity;steroid binding;sterol binding;structural …	acrosomal membrane;apical plasma membrane;basolateral plasma membrane;caveola;cell cortex;cell part;cell surface;cytoplasmic part;cytoplasmic vesicle membrane;cytoplasmic vesicle part;dystrophin-associated glycoprotein complex;endocytic vesicle membrane;endoplasmic reticulum;endosome;Golgi apparatus part;Golgi membrane;integral to membrane;integral to plasma membrane;intracellular membrane-bounde…	Bacterial invasion of epithelial cells;Endocytosis;Focal adhesion;Viral myocarditis	Beta-dystroglycan-caveolin-3 complex;CAV1-VDAC1-ESR1 complex;Caveolin-1 homodimer complex;eNOS-CAV1 complex;NOS3-CAV1-NOSTRIN complex;TRP1-G alpha-11-IP3R3-CAV1 signaling complex;UTM-SGCE-DAG1-CAV1-NOS3 complex	Caveolin	Acetylation;Alternativeinitiation;Cardiomyopathy;Cellmembrane;Completeproteome;Congenitalgeneralizedlipodystrophy;Directproteinsequencing;Diseasemutation;Golgiapparatus;Host-virusinteraction;Isopeptidebond;Limb-girdlemusculardystrophy;Lipoprotein;LongQTsyndrome;Membrane;Palmitate;Phosphoprotein;Polymorphism;Referenceproteome;Ublconjugation
2317	2	2	30.4	7.8409	0	47.085	14696000000	77	P62857	P62857	40S ribosomal protein S28	ENSG00000233927	RPS28	-2.30421		0.0112353	0.610035	-0.743299	27.6337	28.5356	28.2098	23.7247	27.9196	NaN	biosynthetic process;catabolic process;cellular biosynthetic process;cellular catabolic process;cellular component biogenesis;cellular component biogenesis at cellular level;cellular component disassembly;cellular component disassembly at cellular level;cellular component organization;cellular component organization at cellular level;cellular component organization or biogenesis;cellular componen…	structural constituent of ribosome;structural molecule activity	cell part;cytosolic small ribosomal subunit;intracellular organelle part;intracellular part;macromolecular complex;organelle part;ribonucleoprotein complex;small ribosomal subunit	Ribosome	40S ribosomal subunit, cytoplasmic;Ribosome, cytoplasmic	Ribosomal_S28e	3D-structure;Completeproteome;Directproteinsequencing;Referenceproteome;Ribonucleoprotein;Ribosomalprotein
4299	39	38	6.3	1011.1	0	41	77617000000	159	Q8NF91;Q8NF91-4;Q8NF91-2;Q8NF91-8;Q8NF91-7;Q8NF91-11;Q8NF91-9;Q8NF91-3;Q8NF91-12;Q8NF91-10	Q8NF91;Q8NF91-4;Q8NF91-2;Q8NF91-8	Nesprin-1	ENSG00000131018	SYNE1	-2.29814	+	0.00249565	1.38509	-1.01055	33.4394	32.5575	33.5217	29.9202	32.2624	30.4414	biological regulation;cell death;cell differentiation;cellular component organization;cellular component organization at cellular level;cellular component organization or biogenesis;cellular component organization or biogenesis at cellular level;cellular developmental process;cellular process;cytoskeletal anchoring at nuclear membrane;cytoskeleton organization;death;developmental process;Golgi or…	actin binding;binding;cytoskeletal protein binding;identical protein binding;protein binding;protein dimerization activity;protein homodimerization activity	cell part;contractile fiber part;cytoplasmic part;cytoskeleton;Golgi apparatus;integral to membrane;intracellular membrane-bounded organelle;intracellular non-membrane-bounded organelle;intracellular organelle;intracellular organelle part;intracellular part;intrinsic to membrane;macromolecular complex;membrane;membrane part;membrane-bounded organelle;non-membrane-bounded organelle;nuclear membran…			CH;KASH;Spectrin	3D-structure;Actin-binding;Alternativesplicing;Coiledcoil;Completeproteome;Cytoplasm;Cytoskeleton;Diseasemutation;Emery-Dreifussmusculardystrophy;Membrane;Neurodegeneration;Nucleus;Phosphoprotein;Polymorphism;Referenceproteome;Repeat;Transmembrane;Transmembranehelix
4422	22	22	16.1	216.85	0	54.271	1223500000	62	Q8TF72;Q8TF72-2	Q8TF72	Protein Shroom3	ENSG00000138771	SHROOM3	-2.29043	+	0	3.35481	-1.33532	27.7154	27.8185	27.7411	25.1932	25.8873	25.3231	actin cytoskeleton organization;actin filament-based process;anatomical structure development;anatomical structure formation involved in morphogenesis;anatomical structure morphogenesis;apical protein localization;asymmetric protein localization;biological regulation;cell development;cell morphogenesis;cellular component morphogenesis;cellular component organization;cellular component organizatio…		adherens junction;anchoring junction;apical junction complex;apical plasma membrane;cell junction;cell part;cell-cell junction;cytoplasm;cytoskeletal part;cytoskeleton;intracellular non-membrane-bounded organelle;intracellular organelle;intracellular organelle part;intracellular part;macromolecular complex;membrane part;microtubule;non-membrane-bounded organelle;organelle;organelle part;plasma me…			ASD1;ASD2;PDZ	Actin-binding;Alternativesplicing;Celljunction;Cellshape;Completeproteome;Cytoplasm;Cytoskeleton;Developmentalprotein;Microtubule;Phosphoprotein;Polymorphism;Referenceproteome
3606	8	8	26.8	43.332	0	33.543	1048100000	49	Q6P4E1-2;Q6P4E1-5;Q6P4E1;Q6P4E1-4;Q6P4E1-3	Q6P4E1-2;Q6P4E1-5;Q6P4E1;Q6P4E1-4	Protein CASC4	ENSG00000166734	CASC4	-2.27893	+	0.000351351	2.26776	-1.18951	26.8467	27.2581	27.4459	25.6362	24.6922	24.3855			cell part;integral to membrane;intrinsic to membrane;membrane part				Alternativesplicing;Coiledcoil;Completeproteome;Membrane;Phosphoprotein;Referenceproteome;Signal-anchor;Transmembrane;Transmembranehelix
4473	19	19	65.1	38.945	0	121.55	4083400000	147	Q8WVQ1-3;Q8WVQ1;Q8WVQ1-2	Q8WVQ1-3;Q8WVQ1	Soluble calcium-activated nucleotidase 1	ENSG00000171302	CANT1	-2.2739	+	0	4.45385	-1.41031	30.0444	29.8281	29.8327	27.6796	27.4585	27.7454	biological regulation;biosynthetic process;cellular biosynthetic process;cellular macromolecule biosynthetic process;cellular macromolecule metabolic process;cellular metabolic process;cellular process;glycoprotein biosynthetic process;glycoprotein metabolic process;macromolecule biosynthetic process;macromolecule metabolic process;metabolic process;positive regulation of biological process;posit…	binding;calcium ion binding;catalytic activity;cation binding;hydrolase activity;hydrolase activity, acting on acid anhydrides;hydrolase activity, acting on acid anhydrides, in phosphorus-containing anhydrides;ion binding;metal ion binding;molecular transducer activity;nucleoside-diphosphatase activity;pyrophosphatase activity;signal transducer activity;uridine-diphosphatase activity	cell part;cytoplasmic part;endoplasmic reticulum membrane;endoplasmic reticulum part;Golgi apparatus part;Golgi cisterna membrane;Golgi membrane;integral to membrane;intracellular organelle part;intracellular part;intrinsic to membrane;membrane;membrane part;organelle membrane;organelle part	Purine metabolism;Pyrimidine metabolism		Apyrase	3D-structure;Alternativesplicing;Calcium;Completeproteome;Diseasemutation;Dwarfism;Endoplasmicreticulum;Glycoprotein;Golgiapparatus;Hydrolase;Membrane;Metal-binding;Polymorphism;Referenceproteome;Signal-anchor;Transmembrane;Transmembranehelix
1724	18	18	61.4	48.115	0	172.62	9698800000	253	P37268;P37268-2;P37268-3;P37268-4;P37268-5	P37268;P37268-2;P37268-3;P37268-4;P37268-5	Squalene synthase	ENSG00000079459	FDFT1	-2.25234	+	0	5.40201	-1.43984	30.6913	30.7683	30.7513	28.5475	28.3649	28.5416	alcohol metabolic process;biosynthetic process;cellular biosynthetic process;cellular lipid metabolic process;cellular metabolic process;cellular process;cholesterol biosynthetic process;cholesterol metabolic process;farnesyl diphosphate metabolic process;isoprenoid biosynthetic process;isoprenoid metabolic process;lipid biosynthetic process;lipid metabolic process;metabolic process;organophospha…	catalytic activity;farnesyl-diphosphate farnesyltransferase activity;farnesyltranstransferase activity;oxidoreductase activity;prenyltransferase activity;squalene synthase activity;transferase activity;transferase activity, transferring alkyl or aryl (other than methyl) groups	cell part;cytoplasmic part;endoplasmic reticulum membrane;endoplasmic reticulum part;integral to membrane;intracellular organelle part;intracellular part;intrinsic to membrane;membrane;membrane part;organelle membrane;organelle part	Steroid biosynthesis		SQS_PSY	3D-structure;Cholesterolbiosynthesis;Cholesterolmetabolism;Completeproteome;Endoplasmicreticulum;Isoprenebiosynthesis;Lipidbiosynthesis;Lipidmetabolism;Magnesium;Membrane;Multifunctionalenzyme;NADP;Oxidoreductase;Polymorphism;Referenceproteome;Steroidbiosynthesis;Steroidmetabolism;Sterolbiosynthesis;Sterolmetabolism;Transferase;Transmembrane;Transmembranehelix
2027	8	8	10.5	88.463	0	19.28	583800000	31	P51790-4;P51790-5;P51790;P51790-2;P51793-2;P51795;P51793;P51795-2	P51790-4;P51790-5;P51790;P51790-2	H(+)/Cl(-) exchange transporter 3	ENSG00000109572	CLCN3	-2.25122	+	0	3.44148	-1.32347	26.9993	26.6858	27.1455	24.7856	24.8896	24.4017	biological regulation;cation homeostasis;cellular cation homeostasis;cellular chemical homeostasis;cellular homeostasis;cellular ion homeostasis;cellular monovalent inorganic cation homeostasis;cellular process;chemical homeostasis;endosomal lumen acidification;homeostatic process;intracellular pH reduction;ion homeostasis;monovalent inorganic cation homeostasis;pH reduction;regulation of biologi…	active transmembrane transporter activity;adenyl nucleotide binding;adenyl ribonucleotide binding;anion channel activity;anion transmembrane transporter activity;antiporter activity;ATP binding;binding;channel activity;chloride channel activity;gated channel activity;identical protein binding;ion channel activity;ion transmembrane transporter activity;nucleotide binding;passive transmembrane tran…	apical plasma membrane;cell part;cell surface;cytoplasmic part;cytoplasmic vesicle membrane;cytoplasmic vesicle part;early endosome;early endosome membrane;endosomal part;endosome;endosome membrane;Golgi apparatus;Golgi apparatus part;Golgi membrane;integral to membrane;intracellular membrane-bounded organelle;intracellular organelle;intracellular organelle part;intracellular part;intrinsic to me…			CBS;Voltage_CLC	Alternativesplicing;Antiport;ATP-binding;CBSdomain;Chloride;Completeproteome;Cytoplasmicvesicle;Endosome;Glycoprotein;Golgiapparatus;Iontransport;Membrane;Nucleotide-binding;Referenceproteome;Repeat;Transmembrane;Transmembranehelix;Transport
4671	2	2	2.8	60.335	0.0057681	1.6524	175860000	21	Q96AA3	Q96AA3	Protein RFT1 homolog	ENSG00000163933	RFT1	-2.25112	+	0.000554913	1.91879	-1.17731	25.4872	26.1122	25.5906	NaN	23.039	23.9187	biosynthetic process;carbohydrate biosynthetic process;carbohydrate metabolic process;carbohydrate transport;cellular carbohydrate metabolic process;cellular macromolecule metabolic process;cellular metabolic process;cellular process;cellular protein metabolic process;dolichol-linked oligosaccharide biosynthetic process;establishment of localization;glycosylation;macromolecule glycosylation;macro…	lipid transporter activity;substrate-specific transporter activity;transporter activity	cell part;integral to membrane;intrinsic to membrane;membrane part	N-Glycan biosynthesis		Rft-1	Completeproteome;Congenitaldisorderofglycosylation;Diseasemutation;Membrane;Polymorphism;Referenceproteome;Sugartransport;Transmembrane;Transmembranehelix;Transport
1066	15	13	35.9	58.573	0	50.844	2316600000	66	P07948;P07948-2	P07948;P07948-2	Tyrosine-protein kinase Lyn	ENSG00000254087	LYN	-2.24877	+	0.000409449	2.8318	-1.25692	28.5798	28.1678	28.9479	26.0397	26.6573	26.2522	activation of immune response;amine transport;anatomical structure development;antigen receptor-mediated signaling pathway;apoptotic nuclear change;B cell homeostasis;B cell receptor signaling pathway;biological regulation;cell activation;cell communication;cell development;cell differentiation;cell migration;cell motility;cell projection organization;cell surface receptor linked signaling pathwa…	adenyl nucleotide binding;adenyl ribonucleotide binding;ATP binding;binding;catalytic activity;glycolipid binding;glycosphingolipid binding;kinase activity;lipid binding;molecular transducer activity;non-membrane spanning protein tyrosine kinase activity;nucleotide binding;phosphotransferase activity, alcohol group as acceptor;protein kinase activity;protein tyrosine kinase activity;purine nucleo…	alpha2-beta1 integrin complex;cell part;cytoplasmic part;cytoskeletal part;cytosol;Golgi apparatus;integrin complex;intracellular membrane-bounded organelle;intracellular organelle;intracellular organelle part;intracellular part;macromolecular complex;membrane;membrane part;membrane raft;membrane-bounded organelle;membrane-enclosed lumen;mitochondrial crista;mitochondrial intermembrane space;mito…	B cell receptor signaling pathway;Chemokine signaling pathway;Epithelial cell signaling in Helicobacter pylori infection;Fc epsilon RI signaling pathway;Fc gamma R-mediated phagocytosis;Long-term depression	CD20-LCK-LYN-FYN-p75/80 complex, (Raji human B cell line);FGFR2-c-Cbl-Lyn-Fyn complex;p21(ras)GAP-Fyn-Lyn-Yes complex, thrombin stimulated;PLC-gamma-2-Lyn-FcR-gamma complex;PLC-gamma-2-SLP-76-Lyn-Grb2 complex	Pkinase_Tyr;SH2;SH3_1	3D-structure;Adaptiveimmunity;Alternativesplicing;ATP-binding;Cellmembrane;Completeproteome;Cytoplasm;Golgiapparatus;Host-virusinteraction;Immunity;Inflammatoryresponse;Innateimmunity;Kinase;Lipoprotein;Membrane;Myristate;Nucleotide-binding;Nucleus;Palmitate;Phosphoprotein;Polymorphism;Proto-oncogene;Referenceproteome;SH2domain;SH3domain;Transferase;Tyrosine-proteinkinase;Ublconjugation
1093	19	19	24.2	114.54	0	82.366	2693400000	126	P08648	P08648	Integrin alpha-5;Integrin alpha-5 heavy chain;Integrin alpha-5 light chain	ENSG00000161638	ITGA5	-2.24277	+	0	4.16012	-1.37473	29.1992	28.8669	29.1334	26.9005	26.6572	26.9137	anatomical structure formation involved in morphogenesis;angiogenesis;axon guidance;behavior;biological adhesion;biological regulation;blood coagulation;cell adhesion;cell adhesion mediated by integrin;cell junction assembly;cell junction organization;cell migration;cell motility;cell surface receptor linked signaling pathway;cell-cell adhesion;cell-cell adhesion mediated by integrin;cell-substra…	binding;cation binding;cytokine receptor binding;growth factor receptor binding;ion binding;metal ion binding;platelet-derived growth factor receptor binding;protein binding;receptor binding;vascular endothelial growth factor receptor 2 binding;vascular endothelial growth factor receptor binding	alphav-beta3 integrin-vitronectin complex;cell part;cell projection;external side of plasma membrane;integrin complex;macromolecular complex;membrane part;plasma membrane part;protein complex;receptor complex;ruffle;synapse	Arrhythmogenic right ventricular cardiomyopathy (ARVC);Bacterial invasion of epithelial cells;Dilated cardiomyopathy;ECM-receptor interaction;Focal adhesion;Hematopoietic cell lineage;Hypertrophic cardiomyopathy (HCM);Phagosome;Regulation of actin cytoskeleton;Shigellosis	ITGA5-ITGB1-ADAM15 complex;ITGA5-ITGB1-CAL4A3 complex;ITGA5-ITGB1-FN-1-NOV complex;Itga5-Itgb1-Fn1-Sfrp2 complex;ITGA5-ITGB1-FN1-TGM2 complex;ITGA5-ITGB1-SPP1 complex;ITGA5-ITGB3-COL6A3 complex;ITGA5-ITGB4 complex	FG-GAP;Integrin_alpha2	3D-structure;Calcium;Celladhesion;Cleavageonpairofbasicresidues;Completeproteome;Directproteinsequencing;Disulfidebond;Glycoprotein;Host-virusinteraction;Integrin;Membrane;Metal-binding;Polymorphism;Receptor;Referenceproteome;Repeat;Signal;Transmembrane;Transmembranehelix
1384	4	4	7.6	90.762	0	25.032	429090000	33	P19634;P19634-2	P19634	Sodium/hydrogen exchanger 1	ENSG00000090020	SLC9A1	-2.23086	+	0	4.07589	-1.36252	25.9692	26.4056	26.2575	23.9131	24.0763	23.9504	amine metabolic process;aminoglycan catabolic process;aminoglycan metabolic process;biological regulation;carbohydrate catabolic process;carbohydrate metabolic process;cardiac cell differentiation;cardiac muscle cell differentiation;catabolic process;cation homeostasis;cation transport;cell death;cell differentiation;cell growth;cellular cation homeostasis;cellular chemical homeostasis;cellular c…	active transmembrane transporter activity;antiporter activity;binding;calcium-dependent protein binding;cation transmembrane transporter activity;cation:cation antiporter activity;hydrogen ion transmembrane transporter activity;inorganic cation transmembrane transporter activity;ion transmembrane transporter activity;metal ion transmembrane transporter activity;monovalent cation:hydrogen antiport…	basolateral plasma membrane;cell part;cytoplasmic part;endoplasmic reticulum;endoplasmic reticulum membrane;endoplasmic reticulum part;integral to membrane;intracellular membrane-bounded organelle;intracellular organelle;intracellular organelle part;intracellular part;intrinsic to membrane;membrane;membrane part;membrane raft;membrane-bounded organelle;mitochondrion;organelle;organelle membrane;o…	Bile secretion;Cardiac muscle contraction;Gastric acid secretion;Pancreatic secretion;Regulation of actin cytoskeleton;Salivary secretion		Na_H_Exchanger	3D-structure;Alternativesplicing;Antiport;Calmodulin-binding;Cellmembrane;Completeproteome;Endoplasmicreticulum;Glycoprotein;Iontransport;Membrane;Phosphoprotein;Polymorphism;Referenceproteome;Sodium;Sodiumtransport;Transmembrane;Transmembranehelix;Transport;Ublconjugation
1701	6	6	22.8	34.36	0	19.487	1007900000	38	P35914;P35914-3;P35914-2;Q8TB92-5;Q8TB92-2;Q8TB92	P35914;P35914-3;P35914-2	Hydroxymethylglutaryl-CoA lyase, mitochondrial	ENSG00000117305	HMGCL	-2.22949	+	0	4.98914	-1.41037	27.5555	27.4251	27.6176	25.2884	25.4095	25.2119	acyl-CoA metabolic process;amine catabolic process;amine metabolic process;anatomical structure development;biosynthetic process;branched chain family amino acid catabolic process;branched chain family amino acid metabolic process;carboxylic acid catabolic process;carboxylic acid metabolic process;catabolic process;cellular amine metabolic process;cellular amino acid catabolic process;cellular am…	binding;carbon-carbon lyase activity;carboxylic acid binding;catalytic activity;cation binding;coenzyme binding;cofactor binding;fatty acid binding;fatty-acyl-CoA binding;hydroxymethylglutaryl-CoA lyase activity;identical protein binding;ion binding;lipid binding;lyase activity;magnesium ion binding;manganese ion binding;metal ion binding;monocarboxylic acid binding;oxo-acid-lyase activity;protei…	cell part;cytoplasmic part;intracellular membrane-bounded organelle;intracellular organelle;intracellular organelle lumen;intracellular organelle part;intracellular part;membrane;membrane-bounded organelle;membrane-enclosed lumen;microbody;mitochondrial inner membrane;mitochondrial matrix;mitochondrial membrane;mitochondrial part;organelle;organelle inner membrane;organelle lumen;organelle membra…	Butanoate metabolism;Geraniol degradation;Peroxisome;Synthesis and degradation of ketone bodies;Valine, leucine and isoleucine degradation		HMGL-like	3D-structure;Acetylation;Alternativesplicing;Completeproteome;Diseasemutation;Disulfidebond;Lyase;Metal-binding;Mitochondrion;Peroxisome;Referenceproteome;Transitpeptide
2198	3	3	25	25.809	0	130.73	5145700000	97	P60033	P60033	CD81 antigen	ENSG00000110651	CD81	-2.21606	+	0.000315152	2.14667	-1.14398	30.007	29.3174	30.5544	27.5186	28.2448	27.4673	activation of MAPK activity;biological regulation;biosynthetic process;cell proliferation;cellular biosynthetic process;cellular lipid metabolic process;cellular macromolecule metabolic process;cellular metabolic process;cellular process;cellular protein metabolic process;entry into cell of other organism involved in symbiotic interaction;entry into host;entry into host cell;entry into other orga…		cell part;immunological synapse;integral to membrane;integral to plasma membrane;intrinsic to membrane;intrinsic to plasma membrane;membrane part;plasma membrane part	B cell receptor signaling pathway;Hepatitis C;Malaria	GPR56-CD81-Galphaq/11-Gbeta complex;ITGA4-ITGB1-CD81 complex	Tetraspannin	3D-structure;Completeproteome;Disulfidebond;Host-virusinteraction;Membrane;Referenceproteome;Transmembrane;Transmembranehelix
5381	50	50	40.6	196.71	0	171.15	5908700000	305	Q9BY89;Q9BY89-2	Q9BY89	Uncharacterized protein KIAA1671	ENSG00000197077	KIAA1671	-2.20552	+	0	5.49126	-1.41397	30.1539	30.2309	30.139	27.8709	27.9854	28.0508							Alternativesplicing;Completeproteome;Phosphoprotein;Referenceproteome
2789	18	18	39.3	77.422	0	59.167	2380200000	113	Q13586;Q13586-2	Q13586;Q13586-2	Stromal interaction molecule 1	ENSG00000167323	STIM1	-2.20161	+	0	4.1416	-1.35034	29.2757	28.8825	28.974	26.8928	26.7349	26.8997	activation of store-operated calcium channel activity;biological regulation;blood coagulation;calcium ion transport;cation transport;coagulation;detection of calcium ion;detection of chemical stimulus;detection of stimulus;divalent inorganic cation transport;divalent metal ion transport;establishment of localization;hemostasis;ion transport;metal ion transport;multicellular organismal process;pos…	binding;calcium ion binding;cation binding;cytoskeletal protein binding;ion binding;metal ion binding;microtubule binding;microtubule plus-end binding;protein binding;tubulin binding	cell cortex part;cell part;cortical endoplasmic reticulum;cytoplasmic part;cytoskeletal part;endoplasmic reticulum part;integral to endoplasmic reticulum membrane;integral to membrane;integral to organelle membrane;integral to plasma membrane;intracellular organelle part;intracellular part;intrinsic to endoplasmic reticulum membrane;intrinsic to membrane;intrinsic to organelle membrane;intrinsic …			SAM_2	3D-structure;Calcium;Calciumtransport;Cellmembrane;Coiledcoil;Completeproteome;Cytoplasm;Cytoskeleton;Endoplasmicreticulum;Glycoprotein;Iontransport;Membrane;Metal-binding;Microtubule;Phosphoprotein;Polymorphism;Referenceproteome;Signal;Transmembrane;Transmembranehelix;Transport
4056	4	4	19.9	30.549	0	17.379	1115700000	45	Q8IY95-2;Q8IY95	Q8IY95-2;Q8IY95	Transmembrane protein 192	ENSG00000170088	TMEM192	-2.20021	+	0	6.76116	-1.43928	27.9476	27.889	27.9802	25.7427	25.7546	25.7189			cell part;cytoplasmic part;endosome;integral to membrane;intracellular membrane-bounded organelle;intracellular organelle;intracellular organelle part;intracellular part;intrinsic to membrane;late endosome;lysosomal membrane;membrane;membrane part;membrane-bounded organelle;organelle;organelle membrane;organelle part;vacuolar membrane;vacuolar part				Alternativesplicing;Completeproteome;Endosome;Lysosome;Membrane;Phosphoprotein;Referenceproteome;Transmembrane;Transmembranehelix
1180	8	5	36.4	23.408	0	68.518	4171800000	174	P11234;P11234-3;P11234-2	P11234;P11234-3;P11234-2	Ras-related protein Ral-B	ENSG00000144118	RALB	-2.1734	+	0	4.36717	-1.3475	29.662	29.9747	29.8654	27.6912	27.5342	27.7566	apoptosis;biological regulation;cell death;cell surface receptor linked signaling pathway;cellular process;cellular response to stimulus;cytokinesis;death;enzyme linked receptor protein signaling pathway;intracellular signal transduction;nerve growth factor receptor signaling pathway;programmed cell death;Ras protein signal transduction;regulation of biological process;regulation of cellular comp…	binding;catalytic activity;GTP binding;GTPase activity;guanyl nucleotide binding;guanyl ribonucleotide binding;hydrolase activity;hydrolase activity, acting on acid anhydrides;hydrolase activity, acting on acid anhydrides, in phosphorus-containing anhydrides;nucleoside-triphosphatase activity;nucleotide binding;purine nucleotide binding;purine ribonucleoside triphosphate binding;purine ribonucleo…	cell part;membrane;midbody;plasma membrane	Pancreatic cancer;Pathways in cancer		Ras	3D-structure;Apoptosis;Cellcycle;Celldivision;Cellmembrane;Completeproteome;GTP-binding;Lipoprotein;Membrane;Methylation;Nucleotide-binding;Prenylation;Referenceproteome
2061	4	4	46	14.494	0	15.16	590920000	20	P52758	P52758	Ribonuclease UK114	ENSG00000132541	HRSP12	-2.16748	+	0.00116757	1.98235	-1.09672	25.351	26.6396	26.8051	23.8477	24.2179	24.2278	biological regulation;cellular metabolic process;cellular nitrogen compound metabolic process;cellular process;metabolic process;nitrogen compound metabolic process;nucleic acid metabolic process;nucleic acid phosphodiester bond hydrolysis;nucleobase-containing compound metabolic process;posttranscriptional regulation of gene expression;primary metabolic process;regulation of biological process;r…	catalytic activity;deaminase activity;endonuclease activity;hydrolase activity;hydrolase activity, acting on ester bonds;nuclease activity	cell part;cytoplasm;cytoplasmic part;intracellular membrane-bounded organelle;intracellular organelle;intracellular part;membrane-bounded organelle;mitochondrion;nucleus;organelle			Ribonuc_L-PSP	3D-structure;Acetylation;Completeproteome;Cytoplasm;Directproteinsequencing;Endonuclease;Hydrolase;Nuclease;Nucleus;Phosphoprotein;Referenceproteome
2600	13	13	34.4	65.33	0	323.31	12143000000	293	Q08380	Q08380	Galectin-3-binding protein	ENSG00000108679	LGALS3BP	-2.15967	+	0	4.38366	-1.34046	31.5767	31.2296	31.2949	29.2051	29.2635	29.1536	biological adhesion;biological regulation;cell adhesion;cellular defense response;cellular process;cellular response to stimulus;defense response;regulation of biological process;regulation of cellular process;response to stimulus;response to stress;signal transduction	cargo receptor activity;receptor activity;scavenger receptor activity	cell part;extracellular matrix;extracellular membrane-bounded organelle;extracellular organelle;extracellular region part;extracellular space;extracellular vesicular exosome;membrane;membrane-bounded organelle;membrane-bounded vesicle;organelle;proteinaceous extracellular matrix;vesicle			BACK;SRCR	3D-structure;Celladhesion;Completeproteome;Directproteinsequencing;Disulfidebond;Extracellularmatrix;Glycoprotein;Referenceproteome;Secreted;Signal
1351	5	5	28.2	12.538	0	5.6238	15020000000	65	P18077	P18077	60S ribosomal protein L35a	ENSG00000182899	RPL35A	-2.15668	+	0.00235666	1.5944	-1.06775	29.549	30.1402	29.8189	28.3109	27.0478	NaN	biosynthetic process;catabolic process;cellular biosynthetic process;cellular catabolic process;cellular component biogenesis;cellular component biogenesis at cellular level;cellular component disassembly;cellular component disassembly at cellular level;cellular component organization;cellular component organization at cellular level;cellular component organization or biogenesis;cellular componen…	binding;nucleic acid binding;RNA binding;structural constituent of ribosome;structural molecule activity;tRNA binding	cell part;cytosolic large ribosomal subunit;intracellular organelle part;intracellular part;large ribosomal subunit;macromolecular complex;organelle part;ribonucleoprotein complex	Ribosome	60S ribosomal subunit, cytoplasmic;Nop56p-associated pre-rRNA complex;Ribosome, cytoplasmic;TRBP containing complex (DICER, RPL7A, EIF6, MOV10 and subunits of the 60S ribosomal particle)	Ribosomal_L35Ae	3D-structure;Acetylation;Completeproteome;Diamond-Blackfananemia;Diseasemutation;Referenceproteome;Ribonucleoprotein;Ribosomalprotein;RNA-binding;tRNA-binding
203	13	13	49.1	42.026	0	63.381	3982200000	147	O00622	O00622	Protein CYR61	ENSG00000142871	CYR61	-2.15097	+	0	4.90894	-1.35996	29.6468	29.4811	29.4544	27.4371	27.2663	27.4259	anatomical structure development;anatomical structure formation involved in morphogenesis;anatomical structure morphogenesis;angiogenesis;apoptosis;apoptosis involved in heart morphogenesis;apoptosis involved in morphogenesis;atrial septum morphogenesis;atrioventricular valve morphogenesis;biological adhesion;biological regulation;blood vessel development;cardiac septum development;cardiac septum…	binding;carbohydrate binding;extracellular matrix binding;glycosaminoglycan binding;heparin binding;pattern binding;polysaccharide binding	extracellular region		ITGA6-ITGB1-CYR61 complex;ITGAV-ITGB5-CYR61 complex	Cys_knot;IGFBP;TSP_1;VWC	Celladhesion;Chemotaxis;Completeproteome;Disulfidebond;Growthfactorbinding;Heparin-binding;Polymorphism;Referenceproteome;Secreted;Signal
5068	8	8	37.5	42.947	0	54.695	2077600000	89	Q99538-2;Q99538;Q99538-3	Q99538-2;Q99538;Q99538-3	Legumain	ENSG00000100600	LGMN	-2.14851	+	0.000398467	3.12116	-1.24045	28.691	28.5373	28.7801	26.102	26.6087	26.8522	activation of immune response;activation of innate immune response;antigen processing and presentation;antigen processing and presentation of exogenous antigen;antigen processing and presentation of exogenous peptide antigen;antigen processing and presentation of exogenous peptide antigen via MHC class II;antigen processing and presentation of peptide antigen;antigen processing and presentation o…	catalytic activity;cysteine-type endopeptidase activity;cysteine-type peptidase activity;endopeptidase activity;hydrolase activity;peptidase activity;peptidase activity, acting on L-amino acid peptides	apical part of cell;cell part;cytoplasmic part;endosome;intracellular membrane-bounded organelle;intracellular organelle;intracellular organelle lumen;intracellular organelle part;intracellular part;late endosome;lysosomal lumen;membrane-bounded organelle;membrane-enclosed lumen;organelle;organelle lumen;organelle part;vacuolar lumen;vacuolar part	Antigen processing and presentation;Lysosome		Peptidase_C13	Completeproteome;Directproteinsequencing;Glycoprotein;Hydrolase;Lysosome;Polymorphism;Protease;Referenceproteome;Signal;Thiolprotease;Zymogen
3857	16	16	19.9	136.88	0	51.446	1480000000	58	Q86SQ0-2;Q86SQ0-3;Q86SQ0	Q86SQ0-2;Q86SQ0-3;Q86SQ0	Pleckstrin homology-like domain family B member 2	ENSG00000144824	PHLDB2	-2.14842	+	0.000304094	2.19138	-1.18383	27.2317	26.8964	27.4617	NaN	24.7358	25.3605		binding;lipid binding;phospholipid binding	cell part;cytoplasm;cytoskeleton;intermediate filament cytoskeleton;intracellular non-membrane-bounded organelle;intracellular organelle;intracellular part;membrane;non-membrane-bounded organelle;organelle;plasma membrane			PH	Alternativesplicing;Coiledcoil;Completeproteome;Cytoplasm;Membrane;Phosphoprotein;Polymorphism;Referenceproteome
6280	12	11	41.4	45.924	0	42.183	3360200000	86	Q9UH17;Q9UH17-3;Q9UH17-2;P31941-2;P31941;Q96AK3	Q9UH17;Q9UH17-3	DNA dC->dU-editing enzyme APOBEC-3B	ENSG00000179750	APOBEC3B	-2.13328	+	0	5.99542	-1.38233	29.3626	29.3356	29.2542	27.1437	27.17	27.239	biological regulation;defense response;defense response to virus;immune effector process;immune response;immune system process;innate immune response;multi-organism process;negative regulation of biological process;negative regulation of cellular process;negative regulation of transposition;regulation of biological process;regulation of cellular process;regulation of transposition;response to bio…	binding;catalytic activity;cation binding;deaminase activity;deoxycytidine deaminase activity;hydrolase activity;hydrolase activity, acting on carbon-nitrogen (but not peptide) bonds;hydrolase activity, acting on carbon-nitrogen (but not peptide) bonds, in cyclic amidines;ion binding;metal ion binding;nucleic acid binding;RNA binding;transition metal ion binding;zinc ion binding	cell part;intracellular membrane-bounded organelle;intracellular organelle;intracellular part;membrane-bounded organelle;nucleus;organelle	Atrazine degradation		APOBEC_C;APOBEC_N	Alternativesplicing;Antiviraldefense;Completeproteome;Hydrolase;Immunity;Innateimmunity;Metal-binding;Nucleus;Polymorphism;Referenceproteome;Repeat;RNA-binding;Zinc
5978	19	19	40.1	70.352	0	48.479	2349600000	128	Q9NVH0;Q9NVH0-2	Q9NVH0;Q9NVH0-2	Exonuclease 3-5 domain-containing protein 2	ENSG00000081177	EXD2	-2.12825	+	0	4.39103	-1.32268	28.9868	29.024	28.8696	26.6396	26.8899	26.9661	cellular metabolic process;cellular nitrogen compound metabolic process;cellular process;metabolic process;nitrogen compound metabolic process;nucleic acid metabolic process;nucleic acid phosphodiester bond hydrolysis;nucleobase-containing compound metabolic process;primary metabolic process	3'-5' exonuclease activity;binding;catalytic activity;exonuclease activity;hydrolase activity;hydrolase activity, acting on ester bonds;nuclease activity;nucleic acid binding				DNA_pol_A_exo1	Alternativesplicing;Completeproteome;Exonuclease;Hydrolase;Nuclease;Polymorphism;Referenceproteome
4311	11	11	57.5	34.69	0	64.533	2291200000	54	Q8NFV4;Q8NFV4-4;Q8NFV4-6;Q8NFV4-3;Q8NFV4-2;Q8NFV4-5	Q8NFV4;Q8NFV4-4;Q8NFV4-6	Alpha/beta hydrolase domain-containing protein 11	ENSG00000106077;ENSG00000262947	ABHD11	-2.12149	+	0.00239666	1.51413	-1.0355	29.5413	28.8341	28.0969	NaN	26.8453	26.5599		catalytic activity;hydrolase activity	cell part;cytoplasmic part;intracellular membrane-bounded organelle;intracellular organelle;intracellular part;membrane-bounded organelle;mitochondrion;organelle				Alternativesplicing;Completeproteome;Hydrolase;Referenceproteome;Williams-Beurensyndrome
3341	35	35	49.9	117.41	0	317.93	19984000000	623	Q5JRX3;Q5JRX3-2;Q5JRX3-3	Q5JRX3;Q5JRX3-2;Q5JRX3-3	Presequence protease, mitochondrial	ENSG00000107959	PITRM1	-2.11702	+	0	5.36347	-1.3555	31.8213	31.8353	31.6905	29.6994	29.5835	29.7131	macromolecule metabolic process;metabolic process;primary metabolic process;protein metabolic process;proteolysis	binding;catalytic activity;cation binding;endopeptidase activity;enzyme activator activity;enzyme regulator activity;hydrolase activity;ion binding;metal ion binding;metalloendopeptidase activity;metallopeptidase activity;peptidase activity;peptidase activity, acting on L-amino acid peptides	cell part;cytoplasmic part;intracellular membrane-bounded organelle;intracellular organelle;intracellular organelle lumen;intracellular organelle part;intracellular part;membrane-bounded organelle;membrane-enclosed lumen;mitochondrial matrix;mitochondrial part;nucleus;organelle;organelle lumen;organelle part			M16C_assoc;Peptidase_M16;Peptidase_M16_C	Alternativesplicing;Completeproteome;Disulfidebond;Hydrolase;Metal-binding;Metalloprotease;Mitochondrion;Polymorphism;Protease;Referenceproteome;Transitpeptide;Zinc
1502	15	15	19.5	116.61	0	82.542	5997400000	235	P26006;P26006-1	P26006;P26006-1	Integrin alpha-3;Integrin alpha-3 heavy chain;Integrin alpha-3 light chain	ENSG00000005884	ITGA3	-2.11557	+	0.000393939	3.26751	-1.23761	29.9198	29.9309	30.1992	28.2331	27.5807	27.8894	behavior;biological adhesion;biological regulation;blood coagulation;cell adhesion;cell migration;cell motility;cell surface receptor linked signaling pathway;cell-matrix adhesion;cell-substrate adhesion;cellular component movement;cellular process;cellular response to stimulus;coagulation;cognition;hemostasis;immune system process;integrin-mediated signaling pathway;learning or memory;leukocyte …	binding;cation binding;ion binding;metal ion binding	basolateral plasma membrane;cell part;cell surface;integrin complex;macromolecular complex;membrane part;plasma membrane part;protein complex;receptor complex;synapse	Arrhythmogenic right ventricular cardiomyopathy (ARVC);Dilated cardiomyopathy;ECM-receptor interaction;Focal adhesion;Hematopoietic cell lineage;Hypertrophic cardiomyopathy (HCM);Pathways in cancer;Regulation of actin cytoskeleton;Small cell lung cancer	ITGA3-ITGB1 complex;ITGA3-ITGB1-BSG complex;ITGA3-ITGB1-CD151 complex;ITGA3-ITGB1-CD63 complex;ITGA3-ITGB1-THBS1 complex	Integrin_alpha2	Alternativesplicing;Calcium;Celladhesion;Cleavageonpairofbasicresidues;Completeproteome;Directproteinsequencing;Disulfidebond;Epidermolysisbullosa;Glycoprotein;Integrin;Membrane;Metal-binding;Phosphoprotein;Polymorphism;Receptor;Referenceproteome;Repeat;Signal;Transmembrane;Transmembranehelix
316	3	3	15.6	26.825	0	15.386	674990000	35	O15162-2;O15162	O15162-2;O15162	Phospholipid scramblase 1	ENSG00000188313	PLSCR1	-2.10858	+	0.000419355	3.67417	-1.26706	27.3036	26.7827	26.8584	24.8616	24.9179	24.8394	acute inflammatory response;acute-phase response;apoptosis;biological regulation;biosynthetic process;cell activation;cell death;cellular biosynthetic process;cellular component organization;cellular component organization or biogenesis;cellular lipid metabolic process;cellular membrane organization;cellular metabolic process;cellular process;death;defense response;defense response to virus;glyce…	binding;calcium ion binding;cation binding;DNA binding;ion binding;lipid transporter activity;metal ion binding;nucleic acid binding;nucleic acid binding transcription factor activity;phospholipid scramblase activity;phospholipid transporter activity;protein binding;protein domain specific binding;RNA polymerase II core promoter proximal region sequence-specific DNA binding transcription factor a…	cell part;cytoplasmic part;cytosol;extracellular matrix;extracellular region part;Golgi apparatus;integral to membrane;integral to plasma membrane;intracellular membrane-bounded organelle;intracellular non-membrane-bounded organelle;intracellular organelle;intracellular organelle part;intracellular part;intrinsic to membrane;intrinsic to plasma membrane;membrane part;membrane raft;membrane-bounde…			Scramblase	3D-structure;Antiviraldefense;Calcium;Completeproteome;Directproteinsequencing;DNA-binding;Lipoprotein;Membrane;Nucleus;Palmitate;Phosphoprotein;Polymorphism;Referenceproteome;Repeat;SH3-binding;Transmembrane;Transmembranehelix
1687	121	104	56.1	226.53	0	323.31	432700000000	5386	P35579;P35579-2;REV__Q9UKV3-5;REV__Q9UKV3;P13535;Q9Y623;P12882;Q9UKX2;A7E2Y1	P35579;P35579-2	Myosin-9	ENSG00000100345	MYH9	-2.10741	+	0.00045614	4.01531	-1.28943	36.0683	35.9503	35.7	33.9515	33.7587	33.6861	actin cytoskeleton organization;actin cytoskeleton reorganization;actin filament-based movement;actin filament-based process;anatomical structure formation involved in morphogenesis;angiogenesis;axon guidance;biological adhesion;biological regulation;blood vessel endothelial cell migration;cell adhesion;cell cycle process;cell differentiation;cell migration;cell motility;cell projection organizat…	actin binding;actin filament binding;actin-dependent ATPase activity;adenyl nucleotide binding;adenyl ribonucleotide binding;ADP binding;ATP binding;ATPase activity;ATPase activity, coupled;binding;catalytic activity;cytoskeletal protein binding;hydrolase activity;hydrolase activity, acting on acid anhydrides;hydrolase activity, acting on acid anhydrides, in phosphorus-containing anhydrides;ident…	actin filament bundle;actomyosin;actomyosin contractile ring;adherens junction;anchoring junction;cell cortex part;cell division site part;cell junction;cell part;cell projection;cell-cell adherens junction;cell-cell junction;cleavage furrow;contractile ring;cortical cytoskeleton;cytoplasmic part;cytoskeletal part;cytoskeleton;cytosol;extracellular membrane-bounded organelle;extracellular organel…	Tight junction;Viral myocarditis	Emerin complex 1;WIP-WASp-actin-myosin-IIa complex	IQ;Myosin_head;Myosin_N;Myosin_tail_1	3D-structure;Acetylation;Actin-binding;Alportsyndrome;Alternativesplicing;ATP-binding;Calmodulin-binding;Cataract;Cellshape;Coiledcoil;Completeproteome;Cytoplasm;Cytoskeleton;Deafness;Directproteinsequencing;Diseasemutation;Motorprotein;Myosin;Non-syndromicdeafness;Nucleotide-binding;Phosphoprotein;Polymorphism;Referenceproteome;Ublconjugation
4556	60	60	40.3	231.24	0	323.31	9924200000	431	Q92614-4;Q92614;Q92614-3;Q92614-2;Q92614-5	Q92614-4;Q92614;Q92614-3;Q92614-2;Q92614-5	Unconventional myosin-XVIIIa	ENSG00000196535	MYO18A	-2.09005	+	0.000379562	3.22689	-1.22087	30.8836	30.6493	30.2734	28.5192	28.7084	28.3087	actin cytoskeleton organization;actin filament-based process;actomyosin structure organization;biological regulation;cell migration;cell motility;cellular component movement;cellular component organization;cellular component organization at cellular level;cellular component organization or biogenesis;cellular component organization or biogenesis at cellular level;cellular macromolecule metabolic …	adenyl nucleotide binding;adenyl ribonucleotide binding;ATP binding;ATPase activity;ATPase activity, coupled;binding;catalytic activity;DNA binding;DNA-dependent ATPase activity;hydrolase activity;hydrolase activity, acting on acid anhydrides;hydrolase activity, acting on acid anhydrides, in phosphorus-containing anhydrides;motor activity;nucleic acid binding;nucleoside-triphosphatase activity;nu…	actomyosin;cell part;cytoplasmic part;cytoskeletal part;endoplasmic reticulum-Golgi intermediate compartment;intracellular membrane-bounded organelle;intracellular organelle;intracellular organelle part;intracellular part;macromolecular complex;membrane-bounded organelle;myosin complex;organelle;organelle part;protein complex			Myosin_head;Myosin_tail_1;PDZ	Alternativesplicing;ATP-binding;Coiledcoil;Completeproteome;Cytoplasm;Cytoskeleton;Motorprotein;Myosin;Nucleotide-binding;Phosphoprotein;Polymorphism;Referenceproteome
4629	14	14	27.3	82.254	0	33.999	1739500000	38	Q93063;Q93063-2;Q93063-3	Q93063;Q93063-2;Q93063-3	Exostosin-2	ENSG00000151348	EXT2	-2.08785	+	0.00151872	2.10822	-1.14263	28.0084	28.1209	28.6943	25.947	26.4263	NaN	amine metabolic process;aminoglycan biosynthetic process;aminoglycan metabolic process;biological regulation;biosynthetic process;carbohydrate biosynthetic process;carbohydrate metabolic process;cellular biosynthetic process;cellular carbohydrate biosynthetic process;cellular carbohydrate metabolic process;cellular macromolecule biosynthetic process;cellular macromolecule metabolic process;cellul…	acetylglucosaminyltransferase activity;catalytic activity;glucuronosyl-N-acetylglucosaminyl-proteoglycan 4-alpha-N-acetylglucosaminyltransferase activity;glucuronosyltransferase activity;heparan sulfate N-acetylglucosaminyltransferase activity;N-acetylglucosaminyl-proteoglycan 4-beta-glucuronosyltransferase activity;transferase activity;transferase activity, transferring glycosyl groups;transfera…	cell part;cytoplasmic part;endoplasmic reticulum membrane;endoplasmic reticulum part;Golgi apparatus part;Golgi membrane;integral to membrane;intracellular organelle part;intracellular part;intrinsic to endoplasmic reticulum membrane;intrinsic to membrane;intrinsic to organelle membrane;membrane;membrane part;organelle membrane;organelle part	Glycosaminoglycan biosynthesis - heparan sulfate		Exostosin;Glyco_transf_64	Alternativesplicing;Completeproteome;Diseasemutation;Endoplasmicreticulum;Glycoprotein;Glycosyltransferase;Golgiapparatus;Hereditarymultipleexostoses;Membrane;Polymorphism;Referenceproteome;Signal-anchor;Transferase;Transmembrane;Transmembranehelix;Tumorsuppressor
5765	8	5	20.8	57.885	0	7.528	253380000	22	Q9HCM4-2;Q9HCM4-4;Q9HCM4-3;Q9HCM4	Q9HCM4-2;Q9HCM4-4;Q9HCM4-3;Q9HCM4	Band 4.1-like protein 5	ENSG00000115109	EPB41L5	-2.06547	+	0.00136538	1.92913	-1.10165	26.2005	26.1499	27.0415	NaN	24.4457	24.3513	actin cytoskeleton organization;actin filament-based process;actin-mediated cell contraction;actomyosin structure organization;anatomical structure development;anatomical structure morphogenesis;anterior/posterior axis specification;apical constriction;axial mesoderm morphogenesis;axis specification;biological adhesion;biological regulation;cell adhesion;cell growth;cell morphogenesis;cell morpho…		adherens junction;anchoring junction;cell junction;cell part;cell projection membrane;cell projection part;cell-substrate adherens junction;cell-substrate junction;cytoplasm;cytoskeleton;extrinsic to membrane;focal adhesion;intracellular non-membrane-bounded organelle;intracellular organelle;intracellular part;leading edge membrane;membrane part;non-membrane-bounded organelle;organelle;plasma mem…			FA;FERM_C;FERM_M;FERM_N	Alternativesplicing;Celljunction;Completeproteome;Cytoplasm;Phosphoprotein;Polymorphism;Referenceproteome
5527	5	5	9.7	66.63	0	13.859	648350000	27	Q9H1C4	Q9H1C4	Protein unc-93 homolog B1	ENSG00000110057	UNC93B1	-2.06023	+	0.00420826	1.3245	-0.965763	27.2172	26.2331	27.5709	NaN	24.4556	25.438	activation of immune response;activation of innate immune response;biological regulation;cellular process;cellular response to stimulus;defense response;defense response to virus;establishment of localization;establishment of localization in cell;establishment of protein localization;immune effector process;immune response;immune response-activating signal transduction;immune response-regulating …		cell part;cytoplasmic membrane-bounded vesicle;cytoplasmic part;cytoplasmic vesicle;early phagosome;endocytic vesicle;endoplasmic reticulum membrane;endoplasmic reticulum part;endosome;Golgi apparatus part;Golgi membrane;integral to membrane;intracellular membrane-bounded organelle;intracellular organelle;intracellular organelle part;intracellular part;intrinsic to membrane;lysosome;lytic vacuole…			UNC-93	Adaptiveimmunity;Antiviraldefense;Completeproteome;Cytoplasmicvesicle;Endoplasmicreticulum;Endosome;Glycoprotein;Immunity;Innateimmunity;Lysosome;Membrane;Phosphoprotein;Polymorphism;Referenceproteome;Transmembrane;Transmembranehelix
2500	16	16	36.6	56.227	0	78.513	4234400000	154	Q02252-2;Q02252	Q02252-2;Q02252	Methylmalonate-semialdehyde dehydrogenase [acylating], mitochondrial	ENSG00000119711	ALDH6A1	-2.04629	+	0.000320988	2.76122	-1.15309	29.9738	30.1184	29.8164	27.4276	28.3095	28.0326	amine catabolic process;amine metabolic process;branched chain family amino acid catabolic process;branched chain family amino acid metabolic process;brown fat cell differentiation;carboxylic acid catabolic process;carboxylic acid metabolic process;catabolic process;cell differentiation;cellular amine metabolic process;cellular amino acid catabolic process;cellular amino acid metabolic process;ce…	binding;carboxylic acid binding;catalytic activity;coenzyme binding;cofactor binding;fatty acid binding;fatty-acyl-CoA binding;lipid binding;malonate-semialdehyde dehydrogenase (acetylating) activity;methylmalonate-semialdehyde dehydrogenase (acylating) activity;monocarboxylic acid binding;oxidoreductase activity;oxidoreductase activity, acting on the aldehyde or oxo group of donors;oxidoreductas…	cell part;cytoplasmic part;intracellular membrane-bounded organelle;intracellular organelle;intracellular organelle lumen;intracellular organelle part;intracellular part;membrane-bounded organelle;membrane-enclosed lumen;mitochondrial matrix;mitochondrial part;nucleus;organelle;organelle lumen;organelle part	Inositol phosphate metabolism;Propanoate metabolism;Valine, leucine and isoleucine degradation		Aldedh	Acetylation;Completeproteome;Diseasemutation;Mitochondrion;NAD;Oxidoreductase;Referenceproteome;Transitpeptide
334	21	21	52.1	62.924	0	163.42	6705000000	219	O15270	O15270	Serine palmitoyltransferase 2	ENSG00000100596	SPTLC2	-2.04236	+	0.000477064	5.31154	-1.30801	30.598	30.4108	30.581	28.4803	28.5151	28.4673	alcohol biosynthetic process;alcohol metabolic process;amine metabolic process;biosynthetic process;cellular biosynthetic process;cellular lipid metabolic process;cellular metabolic process;cellular nitrogen compound biosynthetic process;cellular nitrogen compound metabolic process;cellular process;ceramide biosynthetic process;ceramide metabolic process;lipid biosynthetic process;lipid metabolic…	binding;C-acyltransferase activity;catalytic activity;cofactor binding;C-palmitoyltransferase activity;palmitoyltransferase activity;pyridoxal phosphate binding;serine C-palmitoyltransferase activity;transferase activity;transferase activity, transferring acyl groups;transferase activity, transferring acyl groups other than amino-acyl groups;vitamin B6 binding;vitamin binding	cell part;cytoplasmic part;endoplasmic reticulum palmitoyltransferase complex;endoplasmic reticulum part;integral to membrane;intracellular membrane-bounded organelle;intracellular organelle;intracellular organelle part;intracellular part;intrinsic to membrane;macromolecular complex;membrane part;membrane-bounded organelle;mitochondrion;organelle;organelle part;palmitoyltransferase complex;protei…	Sphingolipid metabolism	Serine-palmitoyltransferase (SPT) complex	Aminotran_1_2	Acyltransferase;Completeproteome;Diseasemutation;Endoplasmicreticulum;Lipidmetabolism;Membrane;Neuropathy;Pyridoxalphosphate;Referenceproteome;Sphingolipidmetabolism;Transferase;Transmembrane;Transmembranehelix
1429	25	25	43.6	83.134	0	202.58	9459600000	314	P22033	P22033	Methylmalonyl-CoA mutase, mitochondrial	ENSG00000146085	MUT	-2.00231	+	0.000404669	4.34441	-1.24723	31.2588	31.0121	30.9058	29.04	29.0464	29.0834	amine metabolic process;carboxylic acid catabolic process;carboxylic acid metabolic process;catabolic process;cellular amine metabolic process;cellular amino acid metabolic process;cellular catabolic process;cellular ketone metabolic process;cellular lipid catabolic process;cellular lipid metabolic process;cellular metabolic process;cellular nitrogen compound metabolic process;cellular process;de…	amine binding;amino acid binding;binding;carboxylic acid binding;catalytic activity;cation binding;cobalamin binding;intramolecular transferase activity;ion binding;isomerase activity;metal ion binding;methylmalonyl-CoA mutase activity;modified amino acid binding;tetrapyrrole binding;vitamin binding	cell part;cytoplasmic part;intracellular organelle lumen;intracellular organelle part;intracellular part;membrane-enclosed lumen;mitochondrial matrix;mitochondrial part;organelle lumen;organelle part	Carbon fixation pathways in prokaryotes;Glyoxylate and dicarboxylate metabolism;Propanoate metabolism;Valine, leucine and isoleucine degradation		B12-binding;MM_CoA_mutase	3D-structure;Cobalamin;Cobalt;Completeproteome;Directproteinsequencing;Diseasemutation;Isomerase;Metal-binding;Mitochondrion;Polymorphism;Referenceproteome;Transitpeptide
6174	9	9	12.7	107.09	0	12.353	462320000	31	Q9P206;Q9P206-3;Q9P206-2;Q9P206-4	Q9P206;Q9P206-3;Q9P206-2	Uncharacterized protein KIAA1522	ENSG00000162522	KIAA1522	-1.99911	+	0.000304985	2.75821	-1.13022	26.2625	26.799	26.7892	24.3216	24.5277	25.0041							Alternativesplicing;Completeproteome;Lipoprotein;Myristate;Phosphoprotein;Polymorphism;Referenceproteome
5585	6	6	54.5	22.149	0	175.57	1916400000	81	Q9H3Z4;Q9H3Z4-2	Q9H3Z4;Q9H3Z4-2	DnaJ homolog subfamily C member 5	ENSG00000101152	DNAJC5	-1.99647	+	0.000339869	3.23999	-1.17379	28.6883	28.8489	28.6232	27.0639	26.6975	26.4096	biological regulation;cell death;cellular process;death;establishment of localization;establishment of localization in cell;negative regulation of apoptosis;negative regulation of biological process;negative regulation of cell death;negative regulation of cellular process;negative regulation of neuron apoptosis;negative regulation of programmed cell death;neurotransmitter secretion;neurotransmitt…		cell part;clathrin coated vesicle membrane;clathrin sculpted gamma-aminobutyric acid transport vesicle membrane;clathrin-coated vesicle;coated vesicle;coated vesicle membrane;cytoplasmic membrane-bounded vesicle;cytoplasmic part;cytoplasmic vesicle;cytoplasmic vesicle membrane;cytoplasmic vesicle part;intracellular membrane-bounded organelle;intracellular organelle;intracellular organelle part;in…	Protein processing in endoplasmic reticulum		DnaJ	Acetylation;Alternativesplicing;Cellmembrane;Chaperone;Completeproteome;Diseasemutation;Lipoprotein;Membrane;Neurodegeneration;Neuronalceroidlipofuscinosis;Palmitate;Phosphoprotein;Referenceproteome
4225	12	12	37.3	44.272	0	85.535	3019500000	121	Q8NBJ4-2;Q8NBJ4	Q8NBJ4-2;Q8NBJ4	Golgi membrane protein 1	ENSG00000135052	GOLM1	-1.98701	+	0.000356164	3.57102	-1.19386	29.4688	29.5215	29.5195	27.8421	27.3305	27.3762			cell part;cytoplasmic part;Golgi apparatus;integral to membrane;integral to plasma membrane;intracellular membrane-bounded organelle;intracellular organelle;intracellular part;intrinsic to membrane;intrinsic to plasma membrane;membrane part;membrane-bounded organelle;organelle;plasma membrane part				Alternativeinitiation;Coiledcoil;Completeproteome;Glycoprotein;Golgiapparatus;Membrane;Phosphoprotein;Polymorphism;Referenceproteome;Signal-anchor;Transmembrane;Transmembranehelix
779	13	10	17.4	125.87	0	37.328	1225700000	51	O95104;O95104-2;O95104-3	O95104;O95104-2;O95104-3	Splicing factor, arginine/serine-rich 15	ENSG00000156304	SCAF4	-1.98345	+	0.000376812	3.96224	-1.21651	28.0073	27.9333	27.7281	25.8644	25.7572	26.0967		binding;nucleic acid binding;nucleotide binding;RNA binding	cell part;intracellular membrane-bounded organelle;intracellular organelle;intracellular part;membrane-bounded organelle;nucleus;organelle			CTD_bind;RRM_1	Acetylation;Alternativesplicing;Completeproteome;Nucleus;Phosphoprotein;Polymorphism;Referenceproteome;RNA-binding
2848	7	6	19	56.931	0	26.203	686000000	52	Q14119	Q14119	Vascular endothelial zinc finger 1	ENSG00000136451	VEZF1	-1.96534	+	0.00311281	1.60339	-0.953252	27.1575	27.5441	27.0185	24.2372	25.5383	26.0486	anatomical structure development;anatomical structure formation involved in morphogenesis;angiogenesis;biological regulation;biosynthetic process;cell development;cellular biosynthetic process;cellular defense response;cellular developmental process;cellular macromolecule biosynthetic process;cellular macromolecule metabolic process;cellular metabolic process;cellular nitrogen compound metabolic …	binding;cation binding;DNA binding;ion binding;metal ion binding;nucleic acid binding;transition metal ion binding;zinc ion binding	cell part;intracellular membrane-bounded organelle;intracellular organelle;intracellular part;membrane-bounded organelle;nucleus;organelle			zf-C2H2	Acetylation;Activator;Completeproteome;DNA-binding;Metal-binding;Nucleus;Referenceproteome;Repeat;Transcription;Transcriptionregulation;Zinc;Zinc-finger
2177	3	3	12.3	33.403	0	7.9029	254480000	13	P56962	P56962	Syntaxin-17	ENSG00000136874	STX17	-1.95156	+	0.000543909	2.84868	-1.16865	26.0914	25.6906	26.0789	NaN	23.9969	24.0073	autophagic vacuole fusion;cellular component organization;cellular component organization at cellular level;cellular component organization or biogenesis;cellular component organization or biogenesis at cellular level;cellular membrane fusion;cellular membrane organization;cellular process;endoplasmic reticulum-Golgi intermediate compartment organization;ER to Golgi vesicle-mediated transport;est…	binding;protein binding;SNAP receptor activity;SNARE binding	autophagic vacuole membrane;cell part;coated vesicle;coated vesicle membrane;cytoplasmic membrane-bounded vesicle;cytoplasmic part;cytoplasmic vesicle;cytoplasmic vesicle membrane;cytoplasmic vesicle part;cytosol;endoplasmic reticulum membrane;endoplasmic reticulum part;endoplasmic reticulum-Golgi intermediate compartment;endoplasmic reticulum-Golgi intermediate compartment membrane;ER to Golgi t…	SNARE interactions in vesicular transport		SNARE	Acetylation;Autophagy;Coiledcoil;Completeproteome;Cytoplasm;Cytoplasmicvesicle;Endoplasmicreticulum;ER-Golgitransport;Membrane;Phosphoprotein;Referenceproteome;Transmembrane;Transmembranehelix;Transport
3548	16	16	26	100.35	0	16.095	783930000	51	Q6JQN1-2;Q6JQN1;Q6JQN1-5;Q6JQN1-3;Q6JQN1-4	Q6JQN1-2;Q6JQN1;Q6JQN1-5;Q6JQN1-3	Acyl-CoA dehydrogenase family member 10	ENSG00000111271	ACAD10	-1.94675	+	0.000359862	4.02445	-1.19913	27.4211	27.3156	27.0795	25.1914	25.4333	25.3513		acyl-CoA dehydrogenase activity;binding;catalytic activity;coenzyme binding;cofactor binding;flavin adenine dinucleotide binding;hydrolase activity;oxidoreductase activity;oxidoreductase activity, acting on the CH-CH group of donors;transferase activity;transferase activity, transferring phosphorus-containing groups	cell part;cytoplasmic part;intracellular membrane-bounded organelle;intracellular organelle;intracellular part;membrane-bounded organelle;mitochondrion;organelle			Acyl-CoA_dh_1;Acyl-CoA_dh_M;Acyl-CoA_dh_N;APH;HAD_2	Alternativesplicing;Completeproteome;FAD;Flavoprotein;Oxidoreductase;Polymorphism;Referenceproteome
1710	20	20	53.3	50.151	0	184.49	10022000000	274	P36551;P36551-2	P36551	Oxygen-dependent coproporphyrinogen-III oxidase, mitochondrial	ENSG00000080819	CPOX	-1.94637	+	0.000383764	4.60332	-1.22554	30.8167	30.6742	30.7325	28.9454	28.6851	28.7538	biosynthetic process;cellular aromatic compound metabolic process;cellular biosynthetic process;cellular metabolic process;cellular nitrogen compound biosynthetic process;cellular nitrogen compound metabolic process;cellular process;cofactor biosynthetic process;cofactor metabolic process;heme biosynthetic process;heme metabolic process;heterocycle biosynthetic process;heterocycle metabolic proce…	binding;catalytic activity;coproporphyrinogen oxidase activity;identical protein binding;oxidoreductase activity;oxidoreductase activity, acting on the CH-CH group of donors;oxidoreductase activity, acting on the CH-CH group of donors, oxygen as acceptor;protein binding;protein dimerization activity;protein homodimerization activity	cell part;cytoplasmic part;intracellular organelle part;intracellular part;membrane;membrane-enclosed lumen;mitochondrial inner membrane;mitochondrial intermembrane space;mitochondrial membrane;mitochondrial part;organelle envelope lumen;organelle inner membrane;organelle membrane;organelle part	Porphyrin and chlorophyll metabolism		Coprogen_oxidas	3D-structure;Acetylation;Completeproteome;Diseasemutation;Hemebiosynthesis;Mitochondrion;Oxidoreductase;Polymorphism;Porphyrinbiosynthesis;Referenceproteome;Transitpeptide
4204	3	3	7.5	56.494	0	5.839	176030000	14	Q8N9N5;Q8N9N5-4;Q8N9N5-5;Q8N9N5-7;Q8N9N5-3;Q8N9N5-6;Q8N9N5-2	Q8N9N5;Q8N9N5-4;Q8N9N5-5;Q8N9N5-7	Protein BANP	ENSG00000172530	BANP	-1.94344	+	0.00248819	1.70409	-1.00899	24.975	25.1333	26.023	NaN	23.346	23.5213	biological regulation;biosynthetic process;cell cycle;cellular biosynthetic process;cellular component organization;cellular component organization at cellular level;cellular component organization or biogenesis;cellular component organization or biogenesis at cellular level;cellular localization;cellular macromolecule biosynthetic process;cellular macromolecule localization;cellular macromolecul…	binding;DNA binding;nucleic acid binding	cell part;intracellular membrane-bounded organelle;intracellular organelle;intracellular part;membrane-bounded organelle;nucleus;organelle			BEN	Alternativesplicing;Cellcycle;Chromatinregulator;Coiledcoil;Completeproteome;Developmentalprotein;DNA-binding;Nucleus;Referenceproteome;Repressor;Transcription;Transcriptionregulation;Tumorsuppressor
4922	10	10	24	63.882	0	23.535	745650000	42	Q96KC8	Q96KC8	DnaJ homolog subfamily C member 1	ENSG00000136770	DNAJC1	-1.93759	+	0.000350168	3.9144	-1.18795	27.5617	27.4873	27.2857	25.5554	25.6547	25.3118	biological regulation;cellular macromolecule metabolic process;cellular metabolic process;cellular process;cellular protein metabolic process;macromolecule metabolic process;metabolic process;negative regulation of biological process;negative regulation of cellular metabolic process;negative regulation of cellular process;negative regulation of cellular protein metabolic process;negative regulati…	ATPase activator activity;ATPase regulator activity;binding;chromatin binding;DNA binding;enzyme activator activity;enzyme regulator activity;nucleic acid binding;nucleoside-triphosphatase regulator activity	cell part;cytoplasmic part;endoplasmic reticulum;endoplasmic reticulum membrane;endoplasmic reticulum part;integral to membrane;intracellular membrane-bounded organelle;intracellular organelle;intracellular organelle part;intracellular part;intrinsic to membrane;membrane;membrane part;membrane-bounded organelle;nuclear membrane;nuclear part;organelle;organelle membrane;organelle part	Protein processing in endoplasmic reticulum		DnaJ;Myb_DNA-binding	3D-structure;Chaperone;Completeproteome;DNA-binding;Endoplasmicreticulum;Membrane;Microsome;Nucleus;Phosphoprotein;Referenceproteome;Repeat;Signal;Transmembrane;Transmembranehelix
974	20	20	57.2	48.534	0	231.35	32952000000	607	P04181;P04181-2	P04181;P04181-2	Ornithine aminotransferase, mitochondrial;Ornithine aminotransferase, hepatic form;Ornithine aminotransferase, renal form	ENSG00000065154	OAT	-1.9363	+	0.00040625	5.5799	-1.24932	32.5851	32.5584	32.7128	30.6857	30.6555	30.7062	amine biosynthetic process;amine metabolic process;biosynthetic process;carboxylic acid biosynthetic process;carboxylic acid metabolic process;cellular amine metabolic process;cellular amino acid biosynthetic process;cellular amino acid metabolic process;cellular biosynthetic process;cellular component assembly;cellular component organization;cellular component organization or biogenesis;cellular…	binding;catalytic activity;cofactor binding;ornithine-oxo-acid transaminase activity;pyridoxal phosphate binding;transaminase activity;transferase activity;transferase activity, transferring nitrogenous groups;vitamin B6 binding;vitamin binding	cell part;cytoplasmic part;intracellular organelle lumen;intracellular organelle part;intracellular part;membrane-enclosed lumen;mitochondrial matrix;mitochondrial part;organelle lumen;organelle part	Arginine and proline metabolism		Aminotran_3	3D-structure;Alternativesplicing;Aminotransferase;Completeproteome;Directproteinsequencing;Diseasemutation;Mitochondrion;Polymorphism;Pyridoxalphosphate;Referenceproteome;Transferase;Transitpeptide
4158	2	2	32.8	7.7019	0	5.4695	529220000	29	Q8N5G0;Q8N5G0-2	Q8N5G0;Q8N5G0-2	Small integral membrane protein 20	ENSG00000250317	SMIM20	-1.92281	+	0.00033121	3.65176	-1.16416	26.7975	26.9018	26.8248	24.8292	24.7181	25.2084			cell part;integral to membrane;intrinsic to membrane;membrane part				Alternativesplicing;Completeproteome;Membrane;Polymorphism;Referenceproteome;Transmembrane;Transmembranehelix
2707	4	4	34.1	23.279	0	126	2232500000	47	Q13158	Q13158	FAS-associated death domain protein	ENSG00000168040	FADD	-1.91839	+	0.00219114	2.24952	-1.08492	27.3146	27.2918	27.432	25.0758	25.7796	NaN	activation of caspase activity;activation of immune response;activation of innate immune response;biological regulation;cell death;cellular component assembly;cellular component organization;cellular component organization or biogenesis;cellular process;cellular response to abiotic stimulus;cellular response to external stimulus;cellular response to mechanical stimulus;cellular response to stimul…	binding;cytokine receptor binding;death receptor binding;protein binding;receptor binding;tumor necrosis factor receptor superfamily binding	CD95 death-inducing signaling complex;cell body;cell part;cell projection;cytoplasmic part;cytosol;death-inducing signaling complex;intracellular part;macromolecular complex;membrane part;membrane raft;neuron projection;plasma membrane part;protein complex	Alzheimer's disease;Apoptosis;Chagas disease (American trypanosomiasis);ko05152;Pathways in cancer;RIG-I-like receptor signaling pathway;Toll-like receptor signaling pathway	AK2-FADD-caspase-10 (AFAC10) complex;CASP8-FADD-MALT1-BCL10 complex;Death induced signaling complex DISC (FAS, FADD, CASP8, CFLAR), membrane-associated, CD95L induced;Death induced signaling complex II (FADD, CASP8, CFLAR), cytosolic, CD95L induced;Death-inducing signaling complex DISC (type I cells associated), stimulated;DISC complex;FAS-FADD-CASP10 complex;FAS-FADD-CASP8 complex;FAS-FADD-CASP8…	Death;DED	3D-structure;Apoptosis;Completeproteome;Diseasemutation;Host-virusinteraction;Immunity;Innateimmunity;Phosphoprotein;Referenceproteome
1512	11	11	33.7	50.878	0	21.722	2176400000	57	P26572	P26572	Alpha-1,3-mannosyl-glycoprotein 2-beta-N-acetylglucosaminyltransferase	ENSG00000131446	MGAT1	-1.91477	+	0.00134917	2.39692	-1.05095	28.42	28.8103	29.5079	26.9266	26.9754	27.0919	alcohol catabolic process;alcohol metabolic process;amino sugar catabolic process;amino sugar metabolic process;carbohydrate catabolic process;carbohydrate metabolic process;catabolic process;cellular carbohydrate catabolic process;cellular carbohydrate metabolic process;cellular macromolecule metabolic process;cellular metabolic process;cellular nitrogen compound metabolic process;cellular proce…	acetylglucosaminyltransferase activity;alpha-1,3-mannosylglycoprotein 2-beta-N-acetylglucosaminyltransferase activity;binding;catalytic activity;cation binding;ion binding;metal ion binding;transferase activity;transferase activity, transferring glycosyl groups;transferase activity, transferring hexosyl groups;UDP-glycosyltransferase activity	cell part;cytoplasmic part;Golgi apparatus part;Golgi membrane;integral to membrane;intracellular organelle part;intracellular part;intrinsic to membrane;membrane;membrane part;organelle membrane;organelle part	N-Glycan biosynthesis;Various types of N-glycan biosynthesis		GNT-I	Completeproteome;Disulfidebond;Glycosyltransferase;Golgiapparatus;Manganese;Membrane;Metal-binding;Polymorphism;Referenceproteome;Signal-anchor;Transferase;Transmembrane;Transmembranehelix
699	10	10	29.6	61.863	0	41.061	1995800000	58	O75879	O75879	Glutamyl-tRNA(Gln) amidotransferase subunit B, mitochondrial	ENSG00000059691	GATB	-1.91453	+	0.000343234	3.92767	-1.17565	28.8718	28.6877	29.126	26.9864	27.0104	26.945	amine metabolic process;amino acid activation;biosynthetic process;carboxylic acid metabolic process;cellular amine metabolic process;cellular amino acid metabolic process;cellular biosynthetic process;cellular component organization;cellular component organization at cellular level;cellular component organization or biogenesis;cellular component organization or biogenesis at cellular level;cellu…	adenyl nucleotide binding;adenyl ribonucleotide binding;ATP binding;binding;carbon-nitrogen ligase activity, with glutamine as amido-N-donor;catalytic activity;glutaminyl-tRNA synthase (glutamine-hydrolyzing) activity;ligase activity;ligase activity, forming carbon-nitrogen bonds;nucleic acid binding;nucleotide binding;purine nucleotide binding;purine ribonucleoside triphosphate binding;purine ri…	cell part;cytoplasmic part;glutamyl-tRNA(Gln) amidotransferase complex;intracellular membrane-bounded organelle;intracellular organelle;intracellular part;macromolecular complex;membrane-bounded organelle;mitochondrion;organelle;protein complex			GatB_N;GatB_Yqey	ATP-binding;Completeproteome;Directproteinsequencing;Ligase;Mitochondrion;Nucleotide-binding;Polymorphism;Proteinbiosynthesis;Referenceproteome;Transitpeptide
2601	10	10	24.1	69.153	0	14.285	824430000	29	Q08426-2;Q08426	Q08426-2;Q08426	Peroxisomal bifunctional enzyme;Enoyl-CoA hydratase/3,2-trans-enoyl-CoA isomerase;3-hydroxyacyl-CoA dehydrogenase	ENSG00000113790	EHHADH	-1.902	+	0.00137864	2.51558	-1.05848	28.114	27.4225	27.3884	26.0377	25.4168	25.7644	carboxylic acid catabolic process;carboxylic acid metabolic process;catabolic process;cellular catabolic process;cellular ketone metabolic process;cellular lipid catabolic process;cellular lipid metabolic process;cellular macromolecule metabolic process;cellular metabolic process;cellular process;cellular protein metabolic process;fatty acid beta-oxidation;fatty acid catabolic process;fatty acid …	3-hydroxyacyl-CoA dehydrogenase activity;binding;carbon-oxygen lyase activity;catalytic activity;coenzyme binding;cofactor binding;dodecenoyl-CoA delta-isomerase activity;enoyl-CoA hydratase activity;hydro-lyase activity;intramolecular oxidoreductase activity;intramolecular oxidoreductase activity, transposing C=C bonds;isomerase activity;lyase activity;oxidoreductase activity;oxidoreductase acti…	cell part;cytoplasmic part;cytosol;intracellular membrane-bounded organelle;intracellular organelle;intracellular part;membrane-bounded organelle;microbody;mitochondrion;nucleus;organelle;peroxisome	Aminobenzoate degradation;Benzoate degradation;beta-Alanine metabolism;Butanoate metabolism;Caprolactam degradation;Fatty acid metabolism;Lysine degradation;Peroxisome;PPAR signaling pathway;Propanoate metabolism;Tryptophan metabolism;Valine, leucine and isoleucine degradation		3HCDH;3HCDH_N;ECH	Acetylation;Alternativesplicing;Completeproteome;Fattyacidmetabolism;Isomerase;Lipidmetabolism;Lyase;Multifunctionalenzyme;NAD;Oxidoreductase;Peroxisome;Polymorphism;Referenceproteome
1671	32	27	54.2	85.496	0	323.31	22425000000	540	P35222;P35222-2	P35222	Catenin beta-1	ENSG00000168036	CTNNB1	-1.89842	+	0.000322981	3.70583	-1.15401	31.8351	31.8175	32.2059	30.0971	29.9161	30.15	adherens junction assembly;adherens junction organization;anatomical structure development;anatomical structure formation involved in morphogenesis;anatomical structure homeostasis;anatomical structure morphogenesis;androgen receptor signaling pathway;anterior/posterior axis specification;appendage morphogenesis;axis specification;biological adhesion;biological regulation;biosynthetic process;bon…	androgen receptor binding;binding;chromatin binding;DNA binding;double-stranded DNA binding;enzyme binding;hormone receptor binding;kinase binding;molecular transducer activity;nuclear hormone receptor binding;nucleic acid binding;nucleic acid binding transcription factor activity;protein binding;protein binding transcription factor activity;protein kinase binding;receptor binding;regulatory regi…	adherens junction;anchoring junction;apical part of cell;basolateral plasma membrane;beta-catenin destruction complex;beta-catenin-TCF7L2 complex;catenin complex;catenin-TCF7L2 complex;cell cortex;cell junction;cell part;cell projection;cell projection membrane;cell projection part;cell-cell adherens junction;cell-cell junction;cell-substrate adherens junction;cell-substrate junction;centrosome;c…	Adherens junction;Arrhythmogenic right ventricular cardiomyopathy (ARVC);Bacterial invasion of epithelial cells;Basal cell carcinoma;Colorectal cancer;Endometrial cancer;Focal adhesion;Leukocyte transendothelial migration;Melanogenesis;Pathogenic Escherichia coli infection;Pathways in cancer;Prostate cancer;Thyroid cancer;Tight junction;Wnt signaling pathway	APC-Axin-1-beta-catenin complex;AXIN-APC-betaCatenin-GSK3B complex;Axin-PP2A A-PP2A C-GSK3-beta-beta-catenin complex;Bipartite complex (TFC4, CTNNB1);Catenin (alpha) - catenin (beta) complex;Catulin (alpha) - catenin (beta) complex;Cell-cell junction complex (CDH1-CTNNB1);JUN-TCF4-CTNNB1 complex;PAR-3-VE-cadherin-beta-catenin complex;Polycystin-1 multiprotein complex (ACTN1, CDH1, SRC, JUP, VCL, …	Arm	3D-structure;Activator;Alternativesplicing;Celladhesion;Celljunction;Cellmembrane;Chromosomalrearrangement;Completeproteome;Cytoplasm;Cytoskeleton;Diseasemutation;Membrane;Mentalretardation;Nucleus;Phosphoprotein;Polymorphism;Referenceproteome;Repeat;S-nitrosylation;Transcription;Transcriptionregulation;Ublconjugation;Wntsignalingpathway
4369	4	4	30.4	21.838	0	15.426	889770000	26	Q8TCC3-2;Q8TCC3;Q8WU43;Q8TCC3-3	Q8TCC3-2;Q8TCC3	39S ribosomal protein L30, mitochondrial	ENSG00000185414	MRPL30	-1.89635	+	0.000340984	4.1106	-1.17466	27.6728	27.9807	27.6405	25.7974	25.8893	25.9182			cell part;cytoplasmic part;intracellular membrane-bounded organelle;intracellular non-membrane-bounded organelle;intracellular organelle;intracellular part;macromolecular complex;membrane-bounded organelle;mitochondrion;non-membrane-bounded organelle;organelle;ribonucleoprotein complex;ribosome		39S ribosomal subunit, mitochondrial;55S ribosome, mitochondrial	Ribosomal_L30	Alternativesplicing;Completeproteome;Mitochondrion;Polymorphism;Referenceproteome;Ribonucleoprotein;Ribosomalprotein;Transitpeptide
5746	12	12	16.3	119.76	0	20.657	624290000	30	Q9HBR0;Q9HBR0-3;Q9HBR0-2	Q9HBR0;Q9HBR0-3;Q9HBR0-2	Putative sodium-coupled neutral amino acid transporter 10	ENSG00000157637	SLC38A10	-1.88475	+	0.000308605	3.53157	-1.13569	27.6717	27.4766	27.8577	25.8806	25.5538	25.9174	amine transport;amino acid transport;carboxylic acid transport;cation transport;establishment of localization;ion transport;metal ion transport;monovalent inorganic cation transport;nitrogen compound transport;organic acid transport;organic substance transport;sodium ion transport;transport		cell part;integral to membrane;intrinsic to membrane;membrane part			Aa_trans	Alternativesplicing;Amino-acidtransport;Completeproteome;Iontransport;Membrane;Phosphoprotein;Polymorphism;Referenceproteome;Sodium;Sodiumtransport;Transmembrane;Transmembranehelix;Transport
3130	20	20	46.2	68.495	0	89.771	2865700000	113	Q16134;Q16134-3	Q16134;Q16134-3	Electron transfer flavoprotein-ubiquinone oxidoreductase, mitochondrial	ENSG00000171503	ETFDH	-1.86364	+	0.000551724	3.46757	-1.12008	29.0672	29.3995	29.2673	27.4836	27.1184	27.541	carboxylic acid catabolic process;carboxylic acid metabolic process;catabolic process;cellular catabolic process;cellular ketone metabolic process;cellular lipid catabolic process;cellular lipid metabolic process;cellular metabolic process;cellular process;electron transport chain;fatty acid beta-oxidation;fatty acid beta-oxidation using acyl-CoA dehydrogenase;fatty acid catabolic process;fatty a…	4 iron, 4 sulfur cluster binding;binding;catalytic activity;cation binding;coenzyme binding;cofactor binding;electron carrier activity;electron-transferring-flavoprotein dehydrogenase activity;flavin adenine dinucleotide binding;ion binding;iron-sulfur cluster binding;metal cluster binding;metal ion binding;oxidoreductase activity;oxidoreductase activity, acting on the CH-NH group of donors;oxido…	cell part;cytoplasmic part;integral to membrane;integral to mitochondrial inner membrane;integral to mitochondrial membrane;integral to organelle membrane;intracellular organelle lumen;intracellular organelle part;intracellular part;intrinsic to membrane;intrinsic to mitochondrial inner membrane;intrinsic to organelle membrane;membrane part;membrane-enclosed lumen;mitochondrial matrix;mitochondri…			ETF_QO	4Fe-4S;Acetylation;Completeproteome;Electrontransport;FAD;Flavoprotein;Glutaricaciduria;Iron;Iron-sulfur;Membrane;Metal-binding;Mitochondrion;Mitochondrioninnermembrane;Oxidoreductase;Polymorphism;Referenceproteome;Transitpeptide;Transport;Ubiquinone
3203	12	0	42.3	40.968	0	191.96	13457000000	235	Q29963;Q29865	Q29963;Q29865	HLA class I histocompatibility antigen, Cw-6 alpha chain;HLA class I histocompatibility antigen, Cw-18 alpha chain	ENSG00000228299	HLA-C	-1.85703	+	0.000342105	4.67883	-1.17495	31.2824	31.4366	31.5269	29.5595	29.4931	29.6222	antigen processing and presentation;antigen processing and presentation of exogenous antigen;antigen processing and presentation of exogenous peptide antigen;antigen processing and presentation of exogenous peptide antigen via MHC class I;antigen processing and presentation of exogenous peptide antigen via MHC class I, TAP-dependent;antigen processing and presentation of exogenous peptide antigen…		cell part;coated vesicle membrane;cytoplasmic part;cytoplasmic vesicle membrane;cytoplasmic vesicle part;early endosome membrane;endocytic vesicle membrane;endoplasmic reticulum part;endosomal part;endosome membrane;ER to Golgi transport vesicle membrane;Golgi apparatus part;Golgi membrane;integral to endoplasmic reticulum membrane;integral to lumenal side of endoplasmic reticulum membrane;integr…			C1-set;MHC_I;MHC_I_C	Completeproteome;Disulfidebond;Glycoprotein;Host-virusinteraction;Immunity;Membrane;MHCI;Polymorphism;Referenceproteome;Signal;Transmembrane;Transmembranehelix;Ublconjugation
6536	7	7	13.9	68.641	0	33.382	1976900000	80	Q9Y289	Q9Y289	Sodium-dependent multivitamin transporter	ENSG00000138074	SLC5A6	-1.84536	+	0.0025587	2.08044	-0.981525	28.1908	28.2836	28.5236	26.4588	25.8665	27.1366	amide transport;amine metabolic process;amine transport;amino acid transport;biotin metabolic process;biotin transport;carboxylic acid metabolic process;carboxylic acid transport;cellular amide metabolic process;cellular amine metabolic process;cellular amino acid metabolic process;cellular ketone metabolic process;cellular metabolic process;cellular modified amino acid metabolic process;cellular…	active transmembrane transporter activity;cation transmembrane transporter activity;inorganic cation transmembrane transporter activity;ion transmembrane transporter activity;metal ion transmembrane transporter activity;monovalent inorganic cation transmembrane transporter activity;secondary active transmembrane transporter activity;sodium ion transmembrane transporter activity;sodium-dependent m…	brush border membrane;cell part;cell projection membrane;cell projection part;integral to membrane;integral to plasma membrane;intrinsic to membrane;intrinsic to plasma membrane;membrane;membrane part;organelle membrane;organelle part;plasma membrane part;vesicle membrane	Vitamin digestion and absorption		SSF	Biotin;Completeproteome;Glycoprotein;Iontransport;Membrane;Polymorphism;Referenceproteome;Sodium;Sodiumtransport;Symport;Transmembrane;Transmembranehelix;Transport
278	10	3	62.6	19.794	0	286.4	59625000000	524	P19105;O14950	P19105;O14950	Myosin regulatory light chain 12A;Myosin regulatory light chain 12B	ENSG00000101608;ENSG00000118680	MYL12A;MYL12B	-1.84486	+	0.000323988	4.33501	-1.15473	33.0474	32.7292	32.8425	31.087	31.0011	30.9965	axon guidance;biological regulation;chemotaxis;establishment of localization;establishment of localization in cell;establishment of protein localization;establishment of protein localization in membrane;establishment of protein localization in plasma membrane;intracellular protein transport;intracellular transport;locomotion;multicellular organismal process;muscle contraction;muscle system proces…	binding;calcium ion binding;cation binding;ion binding;metal ion binding	actin filament bundle;actomyosin;apical part of cell;cell part;contractile fiber part;cytoplasmic part;cytoskeletal part;cytosol;intracellular organelle part;intracellular part;macromolecular complex;myosin complex;myosin II complex;organelle part;protein complex;stress fiber;Z disc	Focal adhesion;Leukocyte transendothelial migration;Regulation of actin cytoskeleton;Tight junction	WIP-WASp-actin-myosin-IIa complex	EF_hand_5;efhand	Calcium;Completeproteome;Metal-binding;Motorprotein;Muscleprotein;Myosin;Phosphoprotein;Polymorphism;Referenceproteome;Repeat
1183	19	19	53.4	46.588	0	185.52	20499000000	313	P11310;P11310-2	P11310;P11310-2	Medium-chain specific acyl-CoA dehydrogenase, mitochondrial	ENSG00000117054	ACADM	-1.83537	+	0.000318043	4.39098	-1.15139	32.1739	32.3168	32.1048	30.4653	30.2283	30.3958	amine biosynthetic process;amine metabolic process;anatomical structure development;betaine biosynthetic process;betaine metabolic process;biological regulation;biosynthetic process;carbohydrate biosynthetic process;carbohydrate metabolic process;carboxylic acid biosynthetic process;carboxylic acid catabolic process;carboxylic acid metabolic process;cardiac cell differentiation;cardiac muscle cel…	acyl-CoA dehydrogenase activity;binding;catalytic activity;coenzyme binding;cofactor binding;flavin adenine dinucleotide binding;identical protein binding;medium-chain-acyl-CoA dehydrogenase activity;oxidoreductase activity;oxidoreductase activity, acting on the CH-CH group of donors;protein binding	axon;cell part;cell projection;cytoplasmic part;intracellular organelle lumen;intracellular organelle part;intracellular part;membrane-enclosed lumen;mitochondrial matrix;mitochondrial part;neuron projection;organelle lumen;organelle part	beta-Alanine metabolism;Fatty acid metabolism;PPAR signaling pathway;Propanoate metabolism;Valine, leucine and isoleucine degradation		Acyl-CoA_dh_1;Acyl-CoA_dh_M;Acyl-CoA_dh_N	3D-structure;Acetylation;Alternativesplicing;Completeproteome;Directproteinsequencing;Diseasemutation;FAD;Fattyacidmetabolism;Flavoprotein;Lipidmetabolism;Mitochondrion;Oxidoreductase;Polymorphism;Referenceproteome;Transitpeptide
2324	4	4	31.4	13.995	0	19.816	27498000000	85	P62899-3;P62899;P62899-2	P62899-3;P62899;P62899-2	60S ribosomal protein L31	ENSG00000071082	RPL31	-1.82624	+	0.00993103	0.961246	-0.764245	27.958	30.8202	29.9461	28.1163	27.2162	27.9131	biosynthetic process;catabolic process;cellular biosynthetic process;cellular catabolic process;cellular component disassembly;cellular component disassembly at cellular level;cellular component organization;cellular component organization at cellular level;cellular component organization or biogenesis;cellular component organization or biogenesis at cellular level;cellular macromolecular complex…	binding;nucleic acid binding;RNA binding;structural constituent of ribosome;structural molecule activity	cell part;cytosolic large ribosomal subunit;intracellular organelle part;intracellular part;large ribosomal subunit;macromolecular complex;organelle part;ribonucleoprotein complex	Ribosome	60S ribosomal subunit, cytoplasmic;Nop56p-associated pre-rRNA complex;Ribosome, cytoplasmic	Ribosomal_L31e	3D-structure;Acetylation;Alternativesplicing;Completeproteome;Phosphoprotein;Referenceproteome;Ribonucleoprotein;Ribosomalprotein
1668	15	15	41	61.68	0	112.33	2836300000	120	P35052;P35052-2	P35052;P35052-2	Glypican-1;Secreted glypican-1	ENSG00000063660	GPC1	-1.81867	+	0.00234081	2.54131	-1.02206	28.4569	28.4572	28.5556	27.1926	26.5751	26.246	amine metabolic process;aminoglycan biosynthetic process;aminoglycan catabolic process;aminoglycan metabolic process;anatomical structure formation involved in morphogenesis;axon guidance;biological regulation;biosynthetic process;carbohydrate biosynthetic process;carbohydrate catabolic process;carbohydrate metabolic process;catabolic process;cell differentiation;cellular catabolic process;cellul…	binding;cation binding;copper ion binding;extracellular matrix binding;fibroblast growth factor binding;growth factor binding;ion binding;laminin binding;metal ion binding;protein binding;transition metal ion binding	anchored to membrane;cell part;cytoplasmic part;endosome;extracellular matrix;extracellular region part;extracellular space;Golgi apparatus part;Golgi lumen;integral to membrane;integral to plasma membrane;intracellular membrane-bounded organelle;intracellular organelle;intracellular organelle lumen;intracellular organelle part;intracellular part;intrinsic to membrane;intrinsic to plasma membrane…			Glypican	3D-structure;Cellmembrane;Completeproteome;Copper;Directproteinsequencing;Disulfidebond;Endosome;Glycoprotein;GPI-anchor;Heparansulfate;Lipoprotein;Membrane;Polymorphism;Proteoglycan;Referenceproteome;Secreted;Signal;S-nitrosylation;Zinc
3000	22	2	53.2	74.667	0	285.6	13060000000	406	Q15067-2;Q15067-3	Q15067-2;Q15067-3	Peroxisomal acyl-coenzyme A oxidase 1	ENSG00000161533	ACOX1	-1.81834	+	0.000913649	3.68943	-1.10854	31.3997	31.0452	31.415	29.3632	29.6044	29.4373	biological regulation;carboxylic acid catabolic process;carboxylic acid metabolic process;catabolic process;cellular catabolic process;cellular component organization;cellular component organization at cellular level;cellular component organization or biogenesis;cellular component organization or biogenesis at cellular level;cellular ketone metabolic process;cellular lipid catabolic process;cellu…	acyl-CoA dehydrogenase activity;acyl-CoA oxidase activity;binding;carboxylic acid binding;catalytic activity;coenzyme binding;cofactor binding;FAD binding;fatty acid binding;flavin adenine dinucleotide binding;lipid binding;monocarboxylic acid binding;oxidoreductase activity;oxidoreductase activity, acting on the CH-CH group of donors;oxidoreductase activity, acting on the CH-CH group of donors, …	cell part;cytoplasmic part;intracellular membrane-bounded organelle;intracellular organelle;intracellular organelle lumen;intracellular organelle part;intracellular part;membrane;membrane-bounded organelle;membrane-enclosed lumen;microbody;microbody lumen;microbody membrane;microbody part;mitochondrion;organelle;organelle lumen;organelle membrane;organelle part;peroxisomal matrix;peroxisomal memb…	alpha-Linolenic acid metabolism;Biosynthesis of unsaturated fatty acids;Fatty acid metabolism;Peroxisome;PPAR signaling pathway		ACOX;Acyl-CoA_dh_M	Acetylation;Alternativesplicing;Completeproteome;Diseasemutation;FAD;Fattyacidmetabolism;Flavoprotein;Lipidmetabolism;Oxidoreductase;Peroxisome;Phosphoprotein;Polymorphism;Referenceproteome
5215	7	7	46.6	28	0	19.312	617240000	42	Q9BSH5	Q9BSH5	Haloacid dehalogenase-like hydrolase domain-containing protein 3	ENSG00000119431	HDHD3	-1.81308	+	0.00032	4.78059	-1.15181	27.1106	27.1906	27.1577	25.3443	25.4595	25.2158		catalytic activity;hydrolase activity;hydrolase activity, acting on ester bonds;phosphatase activity;phosphoglycolate phosphatase activity;phosphoric ester hydrolase activity	cell part;cytoplasmic part;intracellular membrane-bounded organelle;intracellular organelle;intracellular part;membrane-bounded organelle;mitochondrion;organelle			HAD_2	3D-structure;Acetylation;Completeproteome;Polymorphism;Referenceproteome
1425	10	10	40.1	43.122	0	46.05	2218000000	64	P21953;P21953-2	P21953	2-oxoisovalerate dehydrogenase subunit beta, mitochondrial	ENSG00000083123	BCKDHB	-1.81266	+	0.00216092	2.68453	-1.03289	29.4896	28.6656	29.2452	27.2496	27.4663	27.2465	amine catabolic process;amine metabolic process;branched chain family amino acid catabolic process;branched chain family amino acid metabolic process;carboxylic acid catabolic process;carboxylic acid metabolic process;catabolic process;cellular amine metabolic process;cellular amino acid catabolic process;cellular amino acid metabolic process;cellular catabolic process;cellular ketone metabolic p…	3-methyl-2-oxobutanoate dehydrogenase (2-methylpropanoyl-transferring) activity;alpha-ketoacid dehydrogenase activity;carbon-carbon lyase activity;carboxy-lyase activity;catalytic activity;lyase activity;oxidoreductase activity;oxidoreductase activity, acting on the aldehyde or oxo group of donors;oxidoreductase activity, acting on the aldehyde or oxo group of donors, disulfide as acceptor	cell part;cytoplasmic part;dihydrolipoyl dehydrogenase complex;intracellular organelle part;intracellular part;macromolecular complex;mitochondrial alpha-ketoglutarate dehydrogenase complex;mitochondrial part;mitochondrial tricarboxylic acid cycle enzyme complex;organelle part;protein complex;tricarboxylic acid cycle enzyme complex	Valine, leucine and isoleucine degradation		Transket_pyr;Transketolase_C	3D-structure;Acetylation;Completeproteome;Directproteinsequencing;Diseasemutation;Maplesyrupurinedisease;Mitochondrion;Oxidoreductase;Polymorphism;Referenceproteome;Transitpeptide
3713	29	29	37.9	127.12	0	203.44	5543600000	244	Q6ZRV2	Q6ZRV2	Protein FAM83H	ENSG00000180921;ENSG00000261380	FAM83H	-1.80886	+	0.000328076	5.05766	-1.1573	29.9978	29.9987	29.9682	28.0672	28.282	28.189	anatomical structure development;biomineral tissue development;developmental process;tissue development					DUF1669	Amelogenesisimperfecta;Biomineralization;Completeproteome;Diseasemutation;Phosphoprotein;Polymorphism;Referenceproteome
4155	18	18	21.8	111.77	0	24.725	978380000	72	Q8N5C6;Q8N5C6-2	Q8N5C6;Q8N5C6-2	S1 RNA-binding domain-containing protein 1	ENSG00000068784	SRBD1	-1.80396	+	0.00258487	2.26134	-0.985483	28.0163	27.9281	27.1294	25.8331	26.2091	25.6197	cellular metabolic process;cellular nitrogen compound metabolic process;cellular process;metabolic process;nitrogen compound metabolic process;nucleobase-containing compound metabolic process;primary metabolic process	binding;catalytic activity;hydrolase activity;hydrolase activity, acting on ester bonds;nucleic acid binding;RNA binding				S1;Tex_N	Alternativesplicing;Coiledcoil;Completeproteome;Phosphoprotein;Polymorphism;Referenceproteome;RNA-binding
1941	12	11	33.1	69.43	0	173.58	3569600000	139	P49757-3;P49757;P49757-4;P49757-2;P49757-8;P49757-7;P49757-6;P49757-5;P49757-9	P49757-3;P49757;P49757-4;P49757-2;P49757-8;P49757-7;P49757-6;P49757-5	Protein numb homolog	ENSG00000133961	NUMB	-1.79143	+	0.00162824	2.94793	-1.04476	28.8146	28.7759	29.3233	27.4244	27.0667	27.0484	adherens junction organization;anatomical structure development;axon guidance;biological regulation;cell differentiation;cell division;cell junction organization;cell surface receptor linked signaling pathway;cell-cell junction organization;cellular component organization;cellular component organization or biogenesis;cellular developmental process;cellular process;cellular response to stimulus;ch…		apical part of cell;basolateral plasma membrane;cell part;cytoplasmic part;early endosome;endosome;extrinsic to membrane;extrinsic to plasma membrane;integral to membrane;integral to plasma membrane;intracellular membrane-bounded organelle;intracellular organelle;intracellular part;intrinsic to membrane;intrinsic to plasma membrane;membrane part;membrane-bounded organelle;nucleus;organelle;plasma…	Notch signaling pathway	NUMB-TP53-MDM2 complex;RalBP1-CCNB1-AP2A-NUMB-EPN1 complex	NumbF;PID	Alternativesplicing;Completeproteome;Developmentalprotein;Membrane;Neurogenesis;Phosphoprotein;Polymorphism;Referenceproteome;Ublconjugation
5253	8	8	23.6	54.066	0	11.86	630000000	41	Q9BTY2;Q9BTY2-2	Q9BTY2	Plasma alpha-L-fucosidase	ENSG00000001036	FUCA2	-1.79101	+	0.0014677	3.43259	-1.07843	26.5294	26.6941	26.8013	24.6671	24.8389	25.1457	alcohol metabolic process;carbohydrate metabolic process;cellular carbohydrate metabolic process;cellular metabolic process;cellular process;fucose metabolic process;hexose metabolic process;metabolic process;monosaccharide metabolic process;primary metabolic process;small molecule metabolic process	alpha-L-fucosidase activity;catalytic activity;fucosidase activity;hydrolase activity;hydrolase activity, acting on glycosyl bonds;hydrolase activity, hydrolyzing O-glycosyl compounds	extracellular region	Other glycan degradation		Alpha_L_fucos	Completeproteome;Glycoprotein;Glycosidase;Hydrolase;Polymorphism;Referenceproteome;Secreted;Signal
1720	14	14	46.4	48.755	0	323.31	30261000000	440	P36957;P36957-2	P36957;P36957-2	Dihydrolipoyllysine-residue succinyltransferase component of 2-oxoglutarate dehydrogenase complex, mitochondrial	ENSG00000119689	DLST	-1.78845	+	0.000314199	4.96939	-1.14238	32.6711	32.4668	32.6535	30.8053	30.8024	30.8183	acetyl-CoA catabolic process;acetyl-CoA metabolic process;amine catabolic process;amine metabolic process;aspartate family amino acid catabolic process;aspartate family amino acid metabolic process;carboxylic acid catabolic process;carboxylic acid metabolic process;catabolic process;cellular amine metabolic process;cellular amino acid catabolic process;cellular amino acid metabolic process;cellul…	catalytic activity;dihydrolipoyllysine-residue succinyltransferase activity;S-acyltransferase activity;S-succinyltransferase activity;succinyltransferase activity;transferase activity;transferase activity, transferring acyl groups;transferase activity, transferring acyl groups other than amino-acyl groups	cell part;cytoplasmic part;intracellular membrane-bounded organelle;intracellular organelle;intracellular organelle lumen;intracellular organelle part;intracellular part;macromolecular complex;membrane-bounded organelle;membrane-enclosed lumen;mitochondrial matrix;mitochondrial part;nucleus;organelle;organelle lumen;organelle part;oxoglutarate dehydrogenase complex;protein complex	Citrate cycle (TCA cycle);Lysine degradation		2-oxoacid_dh;Biotin_lipoyl	Acyltransferase;Completeproteome;Directproteinsequencing;Lipoyl;Mitochondrion;Polymorphism;Referenceproteome;Transferase;Transitpeptide;Tricarboxylicacidcycle
1055	6	6	28.8	37.564	0	30.063	1437200000	81	P07711	P07711	Cathepsin L1;Cathepsin L1 heavy chain;Cathepsin L1 light chain	ENSG00000135047	CTSL	-1.78669	+	0.00148303	3.58565	-1.08513	28.4564	28.0718	28.3282	26.464	26.3575	26.6748	activation of immune response;activation of innate immune response;adaptive immune response;antigen processing and presentation;antigen processing and presentation of exogenous antigen;antigen processing and presentation of exogenous peptide antigen;antigen processing and presentation of exogenous peptide antigen via MHC class II;antigen processing and presentation of peptide antigen;antigen proc…	binding;catalytic activity;cysteine-type endopeptidase activity;cysteine-type peptidase activity;endopeptidase activity;histone binding;hydrolase activity;peptidase activity;peptidase activity, acting on L-amino acid peptides;protein binding	cell part;extracellular region;intracellular membrane-bounded organelle;intracellular organelle;intracellular part;membrane-bounded organelle;nucleus;organelle	Antigen processing and presentation;Lysosome;Phagosome;Rheumatoid arthritis		Inhibitor_I29;Peptidase_C1	3D-structure;Completeproteome;Directproteinsequencing;Disulfidebond;Glycoprotein;Hydrolase;Lysosome;Protease;Referenceproteome;Signal;Thiolprotease;Zymogen
701	6	6	6.2	158.54	0	11.125	426110000	27	O75882;O75882-3;O75882-2	O75882;O75882-3;O75882-2	Attractin	ENSG00000088812	ATRN	-1.78087	+	0.00116442	3.84244	-1.0955	26.8198	26.5742	26.5671	25.0377	24.8694	24.7114	biological regulation;defense response;inflammatory response;regulation of biological process;regulation of growth;regulation of multicellular organism growth;regulation of multicellular organismal process;response to chemical stimulus;response to oxidative stress;response to stimulus;response to stress;response to wounding	binding;carbohydrate binding;receptor activity	cell part;cytoplasm;extracellular region part;extracellular space;integral to membrane;integral to plasma membrane;intracellular part;intrinsic to membrane;intrinsic to plasma membrane;membrane part;plasma membrane part			CUB;Kelch_1;PSI	Alternativesplicing;Cellmembrane;Completeproteome;Directproteinsequencing;Disulfidebond;EGF-likedomain;Glycoprotein;Inflammatoryresponse;Kelchrepeat;LamininEGF-likedomain;Lectin;Membrane;Polymorphism;Receptor;Referenceproteome;Repeat;Secreted;Signal;Transmembrane;Transmembranehelix
1243	15	15	54	37.895	0	315.7	29867000000	474	P13995;P13995-2	P13995;P13995-2	Bifunctional methylenetetrahydrofolate dehydrogenase/cyclohydrolase, mitochondrial;NAD-dependent methylenetetrahydrofolate dehydrogenase;Methenyltetrahydrofolate cyclohydrolase	ENSG00000065911	MTHFD2	-1.77818	+	0.000302326	4.69493	-1.12801	32.2519	32.3531	32.4982	30.5622	30.6434	30.5629	aromatic compound biosynthetic process;biosynthetic process;cellular aromatic compound metabolic process;cellular biosynthetic process;cellular metabolic process;cellular nitrogen compound biosynthetic process;cellular nitrogen compound metabolic process;cellular process;coenzyme biosynthetic process;coenzyme metabolic process;cofactor biosynthetic process;cofactor metabolic process;folic acid-co…	anion binding;binding;catalytic activity;cation binding;cyclohydrolase activity;hydrolase activity;hydrolase activity, acting on carbon-nitrogen (but not peptide) bonds;hydrolase activity, acting on carbon-nitrogen (but not peptide) bonds, in cyclic amidines;ion binding;magnesium ion binding;metal ion binding;methenyltetrahydrofolate cyclohydrolase activity;methylenetetrahydrofolate dehydrogenase…	cell part;cytoplasmic part;intracellular membrane-bounded organelle;intracellular organelle;intracellular part;membrane-bounded organelle;mitochondrion;organelle	One carbon pool by folate		THF_DHG_CYH;THF_DHG_CYH_C	3D-structure;Acetylation;Completeproteome;Hydrolase;Magnesium;Mitochondrion;Multifunctionalenzyme;NAD;One-carbonmetabolism;Oxidoreductase;Referenceproteome;Transitpeptide
2459	4	4	11.1	21.493	0	19.57	4937200000	72	Q00765;Q00765-2	Q00765	Receptor expression-enhancing protein 5	ENSG00000129625	REEP5	-1.77465	+	0.00778378	1.19363	-0.807074	29.8237	30.2828	29.5805	26.8383	28.4398	29.085			cell part;integral to membrane;intrinsic to membrane;membrane part			TB2_DP1_HVA22	Acetylation;Completeproteome;Membrane;Referenceproteome;Transmembrane;Transmembranehelix
1340	10	10	29.9	48.473	0	215.98	3207600000	143	P17706;P17706-2;P17706-4;P17706-3	P17706;P17706-2;P17706-4;P17706-3	Tyrosine-protein phosphatase non-receptor type 2	ENSG00000175354	PTPN2	-1.76895	+	0.000553314	4.73382	-1.12364	29.3611	29.2407	29.1284	27.531	27.4711	27.4213	biological regulation;cell surface receptor linked signaling pathway;cellular process;cellular response to chemical stimulus;cellular response to cytokine stimulus;cellular response to endogenous stimulus;cellular response to hormone stimulus;cellular response to insulin stimulus;cellular response to interferon-gamma;cellular response to organic substance;cellular response to peptide hormone stim…	catalytic activity;hydrolase activity;hydrolase activity, acting on ester bonds;non-membrane spanning protein tyrosine phosphatase activity;phosphatase activity;phosphoprotein phosphatase activity;phosphoric ester hydrolase activity;protein tyrosine phosphatase activity	cell part;cytoplasmic part;endoplasmic reticulum;endoplasmic reticulum-Golgi intermediate compartment;intracellular membrane-bounded organelle;intracellular organelle;intracellular organelle part;intracellular part;membrane-bounded organelle;nuclear part;nucleoplasm;nucleus;organelle;organelle part		ITGA1-ITGB1-PTPN2 complex	Y_phosphatase	3D-structure;Alternativesplicing;Completeproteome;Cytoplasm;Endoplasmicreticulum;Hydrolase;Nucleus;Phosphoprotein;Proteinphosphatase;Referenceproteome
3053	17	17	45.5	54.75	0	99.538	13059000000	387	Q15392-2;Q15392	Q15392-2;Q15392	Delta(24)-sterol reductase	ENSG00000116133	DHCR24	-1.7665	+	0.000306785	5.10528	-1.13248	31.3045	31.1767	31.1213	29.4173	29.4017	29.484	alcohol metabolic process;amyloid precursor protein catabolic process;amyloid precursor protein metabolic process;anatomical structure development;biological regulation;biosynthetic process;catabolic process;cell cycle arrest;cell cycle process;cellular component organization;cellular component organization or biogenesis;cellular macromolecule metabolic process;cellular membrane organization;cell…	antigen binding;binding;catalytic activity;coenzyme binding;cofactor binding;delta24-sterol reductase activity;flavin adenine dinucleotide binding;oxidoreductase activity;oxidoreductase activity, acting on CH-OH group of donors;oxidoreductase activity, acting on the CH-CH group of donors;oxidoreductase activity, acting on the CH-CH group of donors, NAD or NADP as acceptor;oxidoreductase activity,…	cell part;cytoplasmic part;cytoskeleton;cytosol;endoplasmic reticulum membrane;endoplasmic reticulum part;Golgi apparatus part;Golgi membrane;integral to membrane;intracellular membrane-bounded organelle;intracellular non-membrane-bounded organelle;intracellular organelle;intracellular organelle part;intracellular part;intrinsic to membrane;membrane;membrane part;membrane-bounded organelle;non-me…	Steroid biosynthesis		FAD_binding_4	Cholesterolbiosynthesis;Cholesterolmetabolism;Completeproteome;Diseasemutation;Endoplasmicreticulum;FAD;Golgiapparatus;Lipidbiosynthesis;Lipidmetabolism;Membrane;NADP;Oxidoreductase;Referenceproteome;Signal;Steroidbiosynthesis;Steroidmetabolism;Sterolbiosynthesis;Sterolmetabolism;Transmembrane;Transmembranehelix
2815	14	14	38.6	63.664	0	86.029	5594900000	184	Q13740-2;Q13740;Q13740-4;Q13740-3	Q13740-2;Q13740	CD166 antigen	ENSG00000170017	ALCAM	-1.76414	+	0.00149474	3.91453	-1.08944	29.9404	29.7925	30.0234	28.3247	27.984	28.1553	axon guidance;biological adhesion;biological regulation;cell adhesion;cellular process;cellular response to stimulus;chemotaxis;locomotion;motor axon guidance;regulation of biological process;regulation of cellular process;response to chemical stimulus;response to external stimulus;response to stimulus;signal transduction;taxis	binding;protein binding;receptor binding	axon;cell body;cell part;cell projection;external side of plasma membrane;integral to membrane;intrinsic to membrane;membrane part;neuron projection;neuronal cell body;plasma membrane part	Cell adhesion molecules (CAMs)		C2-set_2;V-set	3D-structure;Alternativesplicing;Celladhesion;Completeproteome;Directproteinsequencing;Disulfidebond;Glycoprotein;Immunoglobulindomain;Membrane;Polymorphism;Referenceproteome;Repeat;Signal;Transmembrane;Transmembranehelix
4700	2	2	5.7	26.839	0	5.5993	215770000	15	Q96BI3-2;Q96BI3	Q96BI3-2;Q96BI3	Gamma-secretase subunit APH-1A	ENSG00000117362;ENSG00000266334	APH1A	-1.74959	+	0.00246882	2.72356	-1.04891	25.8356	25.9115	26.1072	NaN	24.0253	24.3784	amyloid precursor protein catabolic process;amyloid precursor protein metabolic process;anatomical structure development;biological regulation;catabolic process;cell surface receptor linked signaling pathway;cellular macromolecule metabolic process;cellular metabolic process;cellular process;cellular protein metabolic process;cellular response to stimulus;developmental process;enzyme linked recep…	catalytic activity;endopeptidase activity;hydrolase activity;peptidase activity;peptidase activity, acting on L-amino acid peptides	cell part;cytoplasmic part;endoplasmic reticulum;endoplasmic reticulum membrane;endoplasmic reticulum part;Golgi apparatus;Golgi apparatus part;Golgi cisterna membrane;Golgi membrane;integral to membrane;integral to plasma membrane;intracellular membrane-bounded organelle;intracellular organelle;intracellular organelle part;intracellular part;intrinsic to membrane;intrinsic to plasma membrane;mem…	Alzheimer's disease;Notch signaling pathway	APH1A-PSEN1-NCSTN complex;APH1A-PSEN2-NCSTN complex;CD147-gamma-secretase complex (APH-1a, PS-1, PEN-2, NCT variant);Gamma-secretase complex (APH1A, PSEN1, PSENEN, NCSTN variant);Gamma-secretase complex (APH1A, PSEN1, PSENEN, NCSTN);Gamma-secretase complex (APH1A, PSEN2, PSENEN, NCSTN);Gamma-secretase-Delta1 complex	Aph-1	Alternativesplicing;Completeproteome;Endoplasmicreticulum;Golgiapparatus;Membrane;Notchsignalingpathway;Referenceproteome;Transmembrane;Transmembranehelix
1622	6	5	11.9	69.829	0	15.178	716370000	37	P31641;P31641-2;Q9NSD5-3;P48066-2;P48065;P23975;Q01959;P23975-2;P48066	P31641;P31641-2	Sodium- and chloride-dependent taurine transporter	ENSG00000131389	SLC6A6	-1.74354	+	0.00250794	2.38991	-0.97163	26.3814	26.0631	27.0151	24.5673	24.8765	24.7853	amine metabolic process;amine transport;amino acid transport;carboxylic acid metabolic process;carboxylic acid transport;cellular amine metabolic process;cellular amino acid metabolic process;cellular ketone metabolic process;cellular metabolic process;cellular nitrogen compound metabolic process;cellular process;establishment of localization;metabolic process;nitrogen compound metabolic process;…	active transmembrane transporter activity;amine binding;amine transmembrane transporter activity;binding;cation transmembrane transporter activity;inorganic cation transmembrane transporter activity;ion transmembrane transporter activity;metal ion transmembrane transporter activity;monovalent inorganic cation transmembrane transporter activity;neurotransmitter transporter activity;neurotransmitte…	cell part;integral to membrane;integral to plasma membrane;intrinsic to membrane;intrinsic to plasma membrane;membrane;membrane part;plasma membrane;plasma membrane part			SNF	Alternativesplicing;Cellmembrane;Completeproteome;Glycoprotein;Membrane;Neurotransmittertransport;Phosphoprotein;Polymorphism;Referenceproteome;Symport;Transmembrane;Transmembranehelix;Transport
238	8	8	48.6	24.775	0	44.027	4027600000	119	O14653;O14653-2;O14653-3	O14653;O14653-2;O14653-3	Golgi SNAP receptor complex member 2	ENSG00000108433	GOSR2	-1.74171	+	0.0021709	3.14204	-1.03318	29.5533	29.5053	29.9289	27.8165	28.1769	27.769	activation of signaling protein activity involved in unfolded protein response;biological regulation;cellular component organization;cellular component organization or biogenesis;cellular macromolecule metabolic process;cellular membrane fusion;cellular membrane organization;cellular metabolic process;cellular process;cellular protein metabolic process;ER to Golgi vesicle-mediated transport;estab…	transporter activity	cell part;cytoplasmic part;Golgi apparatus part;Golgi membrane;Golgi stack;integral to membrane;intracellular organelle part;intracellular part;intrinsic to membrane;membrane;membrane part;organelle membrane;organelle part	SNARE interactions in vesicular transport			3D-structure;Acetylation;Alternativesplicing;Coiledcoil;Completeproteome;Directproteinsequencing;Diseasemutation;Epilepsy;Golgiapparatus;Membrane;Polymorphism;Proteintransport;Referenceproteome;Transmembrane;Transmembranehelix;Transport
1601	19	18	28.8	97.376	0	74.076	3383800000	142	P30530-2;P30530	P30530-2;P30530	Tyrosine-protein kinase receptor UFO	ENSG00000167601	AXL	-1.74031	+	0.00151064	4.29238	-1.09149	29.1377	29.0949	29.2848	27.5717	27.3152	27.4095	anatomical structure development;anatomical structure morphogenesis;apoptotic cell clearance;biological adhesion;biological regulation;blood vessel remodeling;cell activation;cell adhesion;cell communication;cell differentiation;cell maturation;cell migration;cell morphogenesis;cell morphogenesis involved in differentiation;cell motility;cell surface receptor linked signaling pathway;cell-substra…	adenyl nucleotide binding;adenyl ribonucleotide binding;ATP binding;binding;catalytic activity;kinase activity;lipid binding;molecular transducer activity;nucleotide binding;phosphatidylserine binding;phospholipid binding;phosphotransferase activity, alcohol group as acceptor;protein kinase activity;protein tyrosine kinase activity;purine nucleotide binding;purine ribonucleoside triphosphate bind…	cell part;cell surface;extracellular region part;extracellular space;integral to membrane;integral to plasma membrane;intrinsic to membrane;intrinsic to plasma membrane;membrane part;plasma membrane part		AXL homodimer complex	fn3;Pkinase_Tyr;V-set	3D-structure;Alternativesplicing;ATP-binding;Cellmembrane;Completeproteome;Differentiation;Disulfidebond;Glycoprotein;Immunity;Immunoglobulindomain;Innateimmunity;Kinase;Membrane;Nucleotide-binding;Oncogene;Phosphoprotein;Polymorphism;Proto-oncogene;Receptor;Referenceproteome;Repeat;Signal;Transferase;Transmembrane;Transmembranehelix;Tyrosine-proteinkinase;Ublconjugation
1575	14	14	36.1	61.719	0	47.889	2311900000	84	P30038;P30038-2;P30038-3	P30038;P30038-2;P30038-3	Delta-1-pyrroline-5-carboxylate dehydrogenase, mitochondrial	ENSG00000159423	ALDH4A1	-1.73542	+	0.000888889	4.61931	-1.09984	29.1084	28.8907	28.8672	27.2032	27.2459	27.2109	4-hydroxyproline catabolic process;4-hydroxyproline metabolic process;amine biosynthetic process;amine catabolic process;amine metabolic process;biosynthetic process;carboxylic acid biosynthetic process;carboxylic acid catabolic process;carboxylic acid metabolic process;catabolic process;cellular amine metabolic process;cellular amino acid biosynthetic process;cellular amino acid catabolic proces…	1-pyrroline-5-carboxylate dehydrogenase activity;aldehyde dehydrogenase (NAD) activity;catalytic activity;electron carrier activity;oxidoreductase activity;oxidoreductase activity, acting on the aldehyde or oxo group of donors;oxidoreductase activity, acting on the aldehyde or oxo group of donors, NAD or NADP as acceptor;oxidoreductase activity, acting on the CH-NH group of donors;oxidoreductase …	cell part;cytoplasmic part;intracellular organelle lumen;intracellular organelle part;intracellular part;membrane-enclosed lumen;mitochondrial matrix;mitochondrial part;organelle lumen;organelle part	Alanine, aspartate and glutamate metabolism;Arginine and proline metabolism		Aldedh	3D-structure;Acetylation;Alternativesplicing;Completeproteome;Directproteinsequencing;Diseasemutation;Mitochondrion;NAD;Oxidoreductase;Polymorphism;Prolinemetabolism;Referenceproteome;Transitpeptide
6189	21	21	25.3	98.555	0	61.218	5188800000	136	Q9P2B2	Q9P2B2	Prostaglandin F2 receptor negative regulator	ENSG00000134247	PTGFRN	-1.73344	+	0.00140943	3.79201	-1.06612	29.8002	29.5141	29.7904	27.8001	28.0545	28.0499	cellular component organization;cellular component organization at cellular level;cellular component organization or biogenesis;cellular component organization or biogenesis at cellular level;cellular process;lipid particle organization;organelle organization		cell part;cytoplasmic part;endoplasmic reticulum membrane;endoplasmic reticulum part;Golgi apparatus;integral to membrane;intracellular membrane-bounded organelle;intracellular organelle;intracellular organelle part;intracellular part;intrinsic to membrane;membrane;membrane part;membrane-bounded organelle;organelle;organelle membrane;organelle part			V-set	Completeproteome;Directproteinsequencing;Disulfidebond;Endoplasmicreticulum;Glycoprotein;Golgiapparatus;Immunoglobulindomain;Membrane;Phosphoprotein;Polymorphism;Referenceproteome;Repeat;Signal;Transmembrane;Transmembranehelix
2700	27	25	30.5	133.97	0	323.31	5601700000	194	Q13136-2;Q13136;O75334-6;O75334-5;O75334-4;O75334-3;O75334;O75334-8;O75334-7;O75334-2;O75335;O75335-2;O75335-1	Q13136-2;Q13136	Liprin-alpha-1	ENSG00000131626	PPFIA1	-1.73084	+	0.00558278	1.74429	-0.888781	27.35	27.4586	28.1363	25.955	26.5452	25.2522	biological adhesion;cell adhesion;cell-matrix adhesion;cell-substrate adhesion;cellular process	molecular transducer activity;signal transducer activity	cell part;cytoplasm;intracellular part			SAM_1;SAM_2	Alternativesplicing;Coiledcoil;Completeproteome;Cytoplasm;Phosphoprotein;Polymorphism;Referenceproteome;Repeat
2784	7	7	9.1	103.13	0	3.639	204270000	17	Q13563-3;Q13563;Q13563-5;Q13563-2;Q13563-4	Q13563-3;Q13563;Q13563-5;Q13563-2;Q13563-4	Polycystin-2	ENSG00000118762	PKD2	-1.72624	+	0.00137198	3.6686	-1.05591	25.656	25.5828	25.6307	23.8093	24.1585	23.7231	anatomical structure development;anatomical structure morphogenesis;aorta development;artery development;ascending thin limb development;biological regulation;blood vessel development;branching involved in ureteric bud morphogenesis;branching morphogenesis of a tube;calcium ion homeostasis;calcium ion transport;calcium ion transport into cytosol;cation homeostasis;cation transport;cell cycle arre…	actinin binding;ATPase binding;binding;calcium channel activity;calcium ion binding;calcium-induced calcium release activity;calcium-release channel activity;cation binding;cation channel activity;cation transmembrane transporter activity;channel activity;cytoskeletal protein binding;enzyme binding;gated channel activity;identical protein binding;intracellular ligand-gated calcium channel activit…	basal cortex;basal plasma membrane;cell cortex part;cell junction;cell part;cell projection;cell projection part;cell-cell junction;cilium;cytoplasmic part;cytoskeletal part;endoplasmic reticulum part;integral to cytosolic side of endoplasmic reticulum membrane;integral to endoplasmic reticulum membrane;integral to lumenal side of endoplasmic reticulum membrane;integral to membrane;integral to or…		PKD2-FPC complex;PKD2-PACS1 complex	PKD_channel	3D-structure;Alternativesplicing;Calcium;Cellprojection;Ciliopathy;Cilium;Coiledcoil;Completeproteome;Directproteinsequencing;Diseasemutation;Endoplasmicreticulum;Glycoprotein;Ionchannel;Iontransport;Membrane;Metal-binding;Phosphoprotein;Polymorphism;Referenceproteome;Transmembrane;Transmembranehelix;Transport
6658	29	29	44.3	87.081	0	323.31	16912000000	405	Q9Y446;Q9Y446-2	Q9Y446;Q9Y446-2	Plakophilin-3	ENSG00000184363	PKP3	-1.72182	+	0.00162441	3.50222	-1.04459	31.0323	30.846	31.3403	29.41	29.2889	29.3543	biological adhesion;cell adhesion;cellular process		anchoring junction;cell junction;cell part;cell-cell junction;desmosome;intracellular membrane-bounded organelle;intracellular organelle;intracellular part;membrane-bounded organelle;nucleus;organelle			Arm	Celladhesion;Celljunction;Completeproteome;Nucleus;Phosphoprotein;Referenceproteome;Repeat
1047	16	16	51.2	44.552	0	191.1	30010000000	564	P07339	P07339	Cathepsin D;Cathepsin D light chain;Cathepsin D heavy chain	ENSG00000117984	CTSD	-1.71718	+	0.00135561	3.69935	-1.05237	32.2457	32.5109	32.6943	30.7488	30.7447	30.8059	antigen processing and presentation;antigen processing and presentation of exogenous antigen;antigen processing and presentation of exogenous peptide antigen;antigen processing and presentation of exogenous peptide antigen via MHC class II;antigen processing and presentation of peptide antigen;antigen processing and presentation of peptide antigen via MHC class II;antigen processing and presentat…	aspartic-type endopeptidase activity;aspartic-type peptidase activity;catalytic activity;endopeptidase activity;hydrolase activity;peptidase activity;peptidase activity, acting on L-amino acid peptides	cell part;cytoplasmic membrane-bounded vesicle;cytoplasmic part;cytoplasmic vesicle;extracellular region part;extracellular space;intracellular membrane-bounded organelle;intracellular organelle;intracellular organelle lumen;intracellular organelle part;intracellular part;lysosomal lumen;melanosome;membrane-bounded organelle;membrane-bounded vesicle;membrane-enclosed lumen;mitochondrion;organelle…	ko05152;Lysosome		A1_Propeptide;Asp	3D-structure;Alzheimerdisease;Aspartylprotease;Completeproteome;Directproteinsequencing;Diseasemutation;Disulfidebond;Glycoprotein;Hydrolase;Lysosome;Neurodegeneration;Neuronalceroidlipofuscinosis;Polymorphism;Protease;Referenceproteome;Secreted;Signal;Zymogen
4812	4	2	57.3	10.35	0	22.086	1304100000	42	Q96FJ2	Q96FJ2	Dynein light chain 2, cytoplasmic	ENSG00000121083	DYNLL2	-1.70574	+	0.00245914	2.48591	-1.00483	27.128	27.5447	27.4358	25.8171	25.5104	NaN	antigen processing and presentation;antigen processing and presentation of exogenous antigen;antigen processing and presentation of exogenous peptide antigen;antigen processing and presentation of exogenous peptide antigen via MHC class II;antigen processing and presentation of peptide antigen;antigen processing and presentation of peptide antigen via MHC class II;antigen processing and presentat…	catalytic activity;hydrolase activity;hydrolase activity, acting on acid anhydrides;hydrolase activity, acting on acid anhydrides, in phosphorus-containing anhydrides;motor activity;nucleoside-triphosphatase activity;pyrophosphatase activity	cell part;centrosome;cytoplasmic part;cytoskeletal part;cytosol;dynein complex;intracellular non-membrane-bounded organelle;intracellular organelle;intracellular organelle part;intracellular part;macromolecular complex;membrane;microtubule;microtubule associated complex;microtubule organizing center;myosin complex;non-membrane-bounded organelle;organelle;organelle part;plasma membrane;protein com…	Vasopressin-regulated water reabsorption		Dynein_light	3D-structure;Completeproteome;Cytoplasm;Cytoskeleton;Dynein;Microtubule;Motorprotein;Referenceproteome;Transport
5290	5	5	41	11.438	0	26.428	4759400000	71	Q9BV40	Q9BV40	Vesicle-associated membrane protein 8	ENSG00000118640	VAMP8	-1.70243	+	0.00234607	3.30219	-1.02244	29.8002	29.9306	30.2285	28.083	28.3275	28.4414	autophagic vacuole fusion;biological regulation;cellular component assembly;cellular component organization;cellular component organization at cellular level;cellular component organization or biogenesis;cellular component organization or biogenesis at cellular level;cellular membrane fusion;cellular membrane organization;cellular process;establishment of localization;establishment of localizatio…		cell part;cytoplasmic part;cytoplasmic vesicle membrane;cytoplasmic vesicle part;early endosome;endosomal part;endosome;endosome membrane;integral to membrane;intracellular membrane-bounded organelle;intracellular organelle;intracellular organelle part;intracellular part;intrinsic to membrane;late endosome membrane;lysosomal membrane;macromolecular complex;membrane;membrane part;membrane-bounded …	SNARE interactions in vesicular transport	SNARE complex (STX4, VAMP8, VAMP3, SNAP23);SNARE complex (VAMP3, VAMP4, VAMP8, STX6)	Synaptobrevin	Acetylation;Autophagy;Coiledcoil;Completeproteome;Directproteinsequencing;Endosome;Lysosome;Membrane;Phosphoprotein;Proteintransport;Referenceproteome;Transmembrane;Transmembranehelix;Transport
5181	16	16	56.4	41.806	0	262.92	12035000000	334	Q9BRK5;Q9BRK5-6;Q9BRK5-2;Q9BRK5-4;Q9BRK5-3;Q9BRK5-5	Q9BRK5;Q9BRK5-6;Q9BRK5-2;Q9BRK5-4;Q9BRK5-3	45 kDa calcium-binding protein	ENSG00000078808	SDF4	-1.70226	+	0.00146015	4.54022	-1.07739	31.1996	31.1685	31.0339	29.549	29.4067	29.3395	anatomical structure development;calcium ion-dependent exocytosis;cell differentiation;cellular developmental process;cellular process;cerebellum development;developmental process;establishment of localization;establishment of localization in cell;exocytosis;fat cell differentiation;response to abiotic stimulus;response to chemical stimulus;response to ethanol;response to light stimulus;response …	binding;calcium ion binding;cation binding;identical protein binding;ion binding;metal ion binding;protein binding	bleb;cell part;cell projection;cytoplasmic part;endosome;Golgi apparatus part;Golgi lumen;intracellular membrane-bounded organelle;intracellular organelle;intracellular organelle lumen;intracellular organelle part;intracellular part;late endosome;membrane;membrane-bounded organelle;membrane-enclosed lumen;organelle;organelle lumen;organelle part;plasma membrane			EF_hand_3;EF_hand_5	Alternativesplicing;Calcium;Cellprojection;Completeproteome;Cytoplasm;Exocytosis;Glycoprotein;Golgiapparatus;Metal-binding;Polymorphism;Referenceproteome;Repeat;Signal
972	3	3	13	26.885	0	37.097	2316700000	65	P04156-2;P04156	P04156-2;P04156	Major prion protein	ENSG00000171867	PRNP	-1.69825	+	0.00136211	3.96721	-1.05392	28.6866	28.5105	28.8866	27.0427	26.9597	26.9865	axon guidance;behavior;biological regulation;cation homeostasis;cell cycle arrest;cell cycle process;cellular cation homeostasis;cellular chemical homeostasis;cellular component assembly;cellular component organization;cellular component organization or biogenesis;cellular copper ion homeostasis;cellular homeostasis;cellular ion homeostasis;cellular process;chemical homeostasis;chemotaxis;cogniti…	binding;cation binding;copper ion binding;cytoskeletal protein binding;ion binding;metal ion binding;microtubule binding;protein binding;transition metal ion binding;tubulin binding	anchored to membrane;cell part;cytoplasmic part;endoplasmic reticulum;extrinsic to membrane;Golgi apparatus;intracellular membrane-bounded organelle;intracellular non-membrane-bounded organelle;intracellular organelle;intracellular organelle part;intracellular part;intrinsic to membrane;membrane;membrane part;membrane raft;membrane-bounded organelle;non-membrane-bounded organelle;nuclear part;nuc…	Prion diseases	PRNP homo-oligomer complex;PRNP-ApolopoproteinE3 complex	Prion;Prion_bPrPp	3D-structure;Alternativeinitiation;Amyloid;Cellcycle;Cellmembrane;Completeproteome;Copper;Cytoplasm;Directproteinsequencing;Diseasemutation;Disulfidebond;Glycoprotein;Golgiapparatus;GPI-anchor;Growtharrest;Lipoprotein;Membrane;Metal-binding;Nucleus;Polymorphism;Prion;Referenceproteome;Repeat;Signal;Ublconjugation;Zinc
4415	11	11	22.1	93.956	0	37.888	1358900000	42	Q8TEY7-3;Q8TEY7-2;Q8TEY7	Q8TEY7-3;Q8TEY7-2;Q8TEY7	Ubiquitin carboxyl-terminal hydrolase 33	ENSG00000077254	USP33	-1.69285	+	0.00135885	4.03288	-1.05353	28.1075	27.8516	28.0945	26.3536	26.1974	26.4242	axon guidance;biological regulation;catabolic process;cell migration;cell motility;cellular catabolic process;cellular component movement;cellular component organization;cellular component organization at cellular level;cellular component organization or biogenesis;cellular component organization or biogenesis at cellular level;cellular macromolecule catabolic process;cellular macromolecule metab…	binding;catalytic activity;cation binding;cysteine-type endopeptidase activity;cysteine-type peptidase activity;endopeptidase activity;hydrolase activity;hydrolase activity, acting on ester bonds;ion binding;metal ion binding;peptidase activity;peptidase activity, acting on L-amino acid peptides;small conjugating protein-specific protease activity;thiolester hydrolase activity;transition metal io…	cell body;cell part;centrosome;cytoplasmic part;cytoplasmic ubiquitin ligase complex;cytoskeletal part;Golgi apparatus;intracellular membrane-bounded organelle;intracellular non-membrane-bounded organelle;intracellular organelle;intracellular organelle part;intracellular part;macromolecular complex;membrane-bounded organelle;microtubule organizing center;non-membrane-bounded organelle;organelle;o…		VHL-VDU1-TCEB1-TCEB2 complex	DUSP;UCH;zf-UBP	3D-structure;Alternativesplicing;Completeproteome;Cytoplasm;Cytoskeleton;Endocytosis;Golgiapparatus;Hydrolase;Metal-binding;Phosphoprotein;Protease;Referenceproteome;Repeat;Thiolprotease;Ublconjugation;Ublconjugationpathway;Zinc;Zinc-finger
5822	9	9	34.7	32.177	0	48.718	4194900000	173	Q9NPL8	Q9NPL8	Complex I assembly factor TIMMDC1, mitochondrial	ENSG00000113845	TIMMDC1	-1.68438	+	0.00143434	4.73661	-1.07242	29.6464	29.7475	29.8493	28.1334	28.0599	27.9967			cell part;cytoplasmic part;integral to membrane;intracellular membrane-bounded organelle;intracellular organelle;intracellular part;intrinsic to membrane;membrane part;membrane-bounded organelle;mitochondrion;organelle			Tim17	Completeproteome;Membrane;Polymorphism;Referenceproteome;Transmembrane;Transmembranehelix
2254	4	4	37.8	13.714	0	85.11	29615000000	112	P61769	P61769	Beta-2-microglobulin;Beta-2-microglobulin form pI 5.3	ENSG00000166710	B2M	-1.67507	+	0.00780599	1.37412	-0.809552	31.2484	30.5741	30.9971	30.2675	29.082	28.4448	antigen processing and presentation;antigen processing and presentation of exogenous antigen;antigen processing and presentation of exogenous peptide antigen;antigen processing and presentation of exogenous peptide antigen via MHC class I;antigen processing and presentation of exogenous peptide antigen via MHC class I, TAP-dependent;antigen processing and presentation of exogenous peptide antigen…		cell part;coated vesicle membrane;cytoplasmic part;cytoplasmic vesicle membrane;cytoplasmic vesicle part;early endosome lumen;early endosome membrane;endocytic vesicle membrane;endoplasmic reticulum lumen;endoplasmic reticulum part;endosomal part;endosome lumen;endosome membrane;ER to Golgi transport vesicle membrane;external side of plasma membrane;extracellular region;extracellular region part;…	Antigen processing and presentation		C1-set	3D-structure;Amyloid;Amyloidosis;Completeproteome;Directproteinsequencing;Diseasemutation;Disulfidebond;Glycation;Glycoprotein;Immunity;Immunoglobulindomain;MHCI;Pyrrolidonecarboxylicacid;Referenceproteome;Secreted;Signal
4916	5	5	19.5	44.772	0	64.999	1341900000	60	Q96K37;Q96K37-2	Q96K37;Q96K37-2	Solute carrier family 35 member E1	ENSG00000127526	SLC35E1	-1.67057	+	0.00266409	2.6157	-0.997584	27.9824	27.5629	27.826	26.2195	NaN	26.0202	establishment of localization;transport		cell part;integral to membrane;intrinsic to membrane;membrane part			EamA;TPT	Alternativesplicing;Completeproteome;Membrane;Phosphoprotein;Referenceproteome;Transmembrane;Transmembranehelix;Transport
3558	4	4	22.4	29.264	0	17.669	731550000	24	Q6NUK4;Q6NUK4-2	Q6NUK4;Q6NUK4-2	Receptor expression-enhancing protein 3	ENSG00000165476	REEP3	-1.67039	+	0.00265896	2.62729	-0.958151	27.1703	27.1098	26.4127	25.212	25.2499	25.2198			cell part;integral to membrane;intrinsic to membrane;membrane part			TB2_DP1_HVA22	Alternativesplicing;Completeproteome;Membrane;Phosphoprotein;Polymorphism;Referenceproteome;Transmembrane;Transmembranehelix
6097	3	3	25.2	12.388	0	8.7346	783720000	32	Q9NYM9	Q9NYM9	BET1-like protein	ENSG00000177951	BET1L	-1.66181	+	0.00247948	3.43134	-1.0076	27.3695	27.4233	27.0822	25.7996	25.4372	25.6528	cellular process;endosome transport;establishment of localization;establishment of localization in cell;establishment of protein localization;intracellular transport;protein transport;retrograde transport, endosome to Golgi;transport;vesicle-mediated transport	binding;protein binding;SNAP receptor activity	cell part;cytoplasmic part;endosome;Golgi apparatus;Golgi apparatus part;Golgi stack;integral to Golgi membrane;integral to membrane;integral to organelle membrane;intracellular membrane-bounded organelle;intracellular organelle;intracellular organelle part;intracellular part;intrinsic to Golgi membrane;intrinsic to membrane;intrinsic to organelle membrane;macromolecular complex;membrane part;mem…	SNARE interactions in vesicular transport		SNARE	Coiledcoil;Completeproteome;Golgiapparatus;Membrane;Phosphoprotein;Proteintransport;Referenceproteome;Transmembrane;Transmembranehelix;Transport
1209	14	14	43.4	50.47	0	67.8	3388200000	124	P12694;P12694-2	P12694;P12694-2	2-oxoisovalerate dehydrogenase subunit alpha, mitochondrial	ENSG00000248098	BCKDHA	-1.63759	+	0.00218605	4.50357	-1.03737	29.4829	29.3292	29.3267	27.8325	27.6305	27.7631	amine catabolic process;amine metabolic process;branched chain family amino acid catabolic process;branched chain family amino acid metabolic process;carboxylic acid catabolic process;carboxylic acid metabolic process;catabolic process;cellular amine metabolic process;cellular amino acid catabolic process;cellular amino acid metabolic process;cellular catabolic process;cellular ketone metabolic p…	3-methyl-2-oxobutanoate dehydrogenase (2-methylpropanoyl-transferring) activity;alpha-ketoacid dehydrogenase activity;binding;carbon-carbon lyase activity;carboxy-lyase activity;catalytic activity;cation binding;ion binding;lyase activity;metal ion binding;oxidoreductase activity;oxidoreductase activity, acting on the aldehyde or oxo group of donors;oxidoreductase activity, acting on the aldehyde…	cell part;cytoplasmic part;dihydrolipoyl dehydrogenase complex;intracellular organelle part;intracellular part;macromolecular complex;mitochondrial alpha-ketoglutarate dehydrogenase complex;mitochondrial part;mitochondrial tricarboxylic acid cycle enzyme complex;organelle part;protein complex;tricarboxylic acid cycle enzyme complex	Valine, leucine and isoleucine degradation		E1_dh	3D-structure;Completeproteome;Directproteinsequencing;Diseasemutation;Maplesyrupurinedisease;Metal-binding;Mitochondrion;Oxidoreductase;Phosphoprotein;Polymorphism;Potassium;Referenceproteome;Thiaminepyrophosphate;Transitpeptide
1693	8	1	55.1	19.438	0	21.542	601060000	30	P35613-3	P35613-3	Basigin	ENSG00000172270	BSG	-1.63312	+	0.00990099	1.15574	-0.781151	25.3923	25.9573	26.3446	NaN	23.6336	24.8963	anatomical structure development;anatomical structure morphogenesis;biological regulation;blood coagulation;carboxylic acid metabolic process;cell migration;cell motility;cell surface receptor linked signaling pathway;cellular component movement;cellular ketone metabolic process;cellular metabolic process;cellular process;cellular response to stimulus;coagulation;decidualization;developmental pro…	binding;carbohydrate binding;mannose binding;monosaccharide binding;sugar binding	acrosomal membrane;cell part;cytoplasmic membrane-bounded vesicle;cytoplasmic part;cytoplasmic vesicle;cytoplasmic vesicle membrane;cytoplasmic vesicle part;Golgi apparatus part;Golgi membrane;integral to membrane;intracellular membrane-bounded organelle;intracellular organelle;intracellular organelle part;intracellular part;intrinsic to membrane;melanosome;membrane;membrane part;membrane raft;me…		CD147-gamma-secretase complex (APH-1a, PS-1, PEN-2, NCT variant);ITGA3-ITGB1-BSG complex	I-set	3D-structure;Alternativepromoterusage;Alternativesplicing;Bloodgroupantigen;Cellmembrane;Completeproteome;Directproteinsequencing;Disulfidebond;Glycoprotein;Immunoglobulindomain;Lectin;Mannose-binding;Membrane;Phosphoprotein;Polymorphism;Referenceproteome;Signal;Transmembrane;Transmembranehelix
6265	11	1	30.1	46.671	0	48.496	3095700000	150	Q9UG56	Q9UG56	Phosphatidylserine decarboxylase proenzyme;Phosphatidylserine decarboxylase alpha chain;Phosphatidylserine decarboxylase beta chain	ENSG00000241878	PISD	-1.63125	+	0.00256389	3.27123	-0.982026	28.8977	29.0006	28.7348	27.5214	27.1655	27.0525	alcohol metabolic process;amine biosynthetic process;amine metabolic process;biosynthetic process;cellular amine metabolic process;cellular biogenic amine biosynthetic process;cellular biogenic amine metabolic process;cellular biosynthetic process;cellular lipid metabolic process;cellular metabolic process;cellular nitrogen compound biosynthetic process;cellular nitrogen compound metabolic proces…	carbon-carbon lyase activity;carboxy-lyase activity;catalytic activity;lyase activity;phosphatidylserine decarboxylase activity	cell part;cytoplasmic part;intracellular membrane-bounded organelle;intracellular organelle;intracellular part;membrane-bounded organelle;mitochondrion;nucleus;organelle	Glycerophospholipid metabolism		PS_Dcarbxylase	Alternativesplicing;Completeproteome;Decarboxylase;Lipidbiosynthesis;Lipidmetabolism;Lyase;Mitochondrion;Phospholipidbiosynthesis;Phospholipidmetabolism;Pyruvate;Referenceproteome;Zymogen
834	51	51	41.7	200.84	0	231.51	7100700000	348	O95425-2;O95425-4;O95425-3;O95425	O95425-2;O95425-4;O95425-3;O95425	Supervillin	ENSG00000197321	SVIL	-1.62641	+	0.00252308	3.9859	-1.01303	30.3695	30.3927	30.2577	28.5794	28.6596	28.9018	anatomical structure development;cellular component organization;cellular component organization at cellular level;cellular component organization or biogenesis;cellular component organization or biogenesis at cellular level;cellular process;cytoskeleton organization;developmental process;muscle tissue development;organelle organization;skeletal muscle tissue development;striated muscle tissue de…	actin binding;actin filament binding;binding;cytoskeletal protein binding;protein binding	actin cytoskeleton;cell junction;cell part;cell projection;contractile fiber part;costamere;cytoplasmic part;cytoskeletal part;cytoskeleton;intracellular membrane-bounded organelle;intracellular non-membrane-bounded organelle;intracellular organelle;intracellular organelle part;intracellular part;invadopodium;macromolecular complex;membrane;membrane-bounded organelle;non-membrane-bounded organell…		P2X7 receptor signalling complex	Gelsolin;VHP	3D-structure;Actin-binding;Alternativesplicing;Calcium;Celljunction;Cellmembrane;Cellprojection;Completeproteome;Cytoplasm;Cytoskeleton;Membrane;Phosphoprotein;Polymorphism;Referenceproteome;Repeat
3574	14	14	32.8	67.942	0	129.79	3172100000	132	Q6NYC8;Q6NYC8-2;Q6NYC8-3;Q6NYC8-4	Q6NYC8;Q6NYC8-2;Q6NYC8-3	Phostensin	ENSG00000146112;ENSG00000206485;ENSG00000225060;ENSG00000229998;ENSG00000230341;ENSG00000231247;ENSG00000234000	PPP1R18	-1.61003	+	0.00245824	4.00139	-1.00408	28.8778	28.9177	28.9853	27.2352	27.2023	27.5132			cell part;cytoplasm;cytoskeleton;intracellular non-membrane-bounded organelle;intracellular organelle;intracellular part;non-membrane-bounded organelle;organelle			Phostensin;Phostensin_N	Actin-binding;Alternativesplicing;Completeproteome;Cytoplasm;Cytoskeleton;Phosphoprotein;Polymorphism;Referenceproteome
2774	9	9	29.4	44.659	0	74.221	4938000000	134	Q13510;Q13510-2;Q13510-3	Q13510;Q13510-2;Q13510-3	Acid ceramidase;Acid ceramidase subunit alpha;Acid ceramidase subunit beta	ENSG00000104763	ASAH1	-1.60783	+	0.00236199	4.67327	-1.02413	29.8792	29.6811	29.7318	28.0833	28.203	28.1823	anatomical structure development;cell death;cellular lipid metabolic process;cellular metabolic process;cellular process;ceramide metabolic process;death;developmental process;glycolipid metabolic process;glycosphingolipid metabolic process;lipid metabolic process;lung development;membrane lipid metabolic process;metabolic process;organ development;primary metabolic process;response to chemical s…	catalytic activity;ceramidase activity;hydrolase activity;hydrolase activity, acting on carbon-nitrogen (but not peptide) bonds;hydrolase activity, acting on carbon-nitrogen (but not peptide) bonds, in linear amides	cell part;cytoplasmic part;intracellular organelle lumen;intracellular organelle part;intracellular part;lysosomal lumen;membrane-enclosed lumen;organelle lumen;organelle part;vacuolar lumen;vacuolar part	Lysosome;Sphingolipid metabolism		CBAH	Alternativesplicing;Completeproteome;Directproteinsequencing;Diseasemutation;Epilepsy;Glycoprotein;Hydrolase;Lysosome;Neurodegeneration;Polymorphism;Referenceproteome;Signal
4843	6	6	16.9	51.017	0	13.276	841480000	24	Q96GQ5;Q96GQ5-2	Q96GQ5;Q96GQ5-2	RUS1 family protein C16orf58	ENSG00000140688	C16orf58	-1.60188	+	0.00246394	3.26359	-0.965617	27.454	27.4184	27.3492	25.8224	26.0664	25.5271			cell part;integral to membrane;intrinsic to membrane;membrane part			DUF647	Alternativesplicing;Completeproteome;Membrane;Polymorphism;Referenceproteome;Transmembrane;Transmembranehelix
266	7	7	25.7	46.36	0	25.113	1056300000	47	O14874;O14874-2;O14874-3	O14874;O14874-2;O14874-3	[3-methyl-2-oxobutanoate dehydrogenase [lipoamide]] kinase, mitochondrial	ENSG00000103507	BCKDK	-1.60174	+	0.00238669	3.84936	-0.993314	27.8022	27.9643	27.6478	26.2948	26.2386	26.0757	amine catabolic process;amine metabolic process;branched chain family amino acid catabolic process;branched chain family amino acid metabolic process;carboxylic acid catabolic process;carboxylic acid metabolic process;catabolic process;cellular amine metabolic process;cellular amino acid catabolic process;cellular amino acid metabolic process;cellular catabolic process;cellular ketone metabolic p…	[3-methyl-2-oxobutanoate dehydrogenase (acetyl-transferring)] kinase activity;adenyl nucleotide binding;adenyl ribonucleotide binding;ATP binding;binding;catalytic activity;kinase activity;nucleotide binding;phosphotransferase activity, alcohol group as acceptor;protein kinase activity;protein serine/threonine kinase activity;purine nucleotide binding;purine ribonucleoside triphosphate binding;pu…	cell part;cytoplasmic part;dihydrolipoyl dehydrogenase complex;intracellular organelle part;intracellular part;macromolecular complex;mitochondrial alpha-ketoglutarate dehydrogenase complex;mitochondrial part;mitochondrial tricarboxylic acid cycle enzyme complex;organelle part;protein complex;tricarboxylic acid cycle enzyme complex			BCDHK_Adom3;HATPase_c	Acetylation;ATP-binding;Completeproteome;Diseasemutation;Kinase;Mitochondrion;Nucleotide-binding;Phosphoprotein;Referenceproteome;Serine/threonine-proteinkinase;Transferase;Transitpeptide
1892	21	20	43.8	50.909	0	95.731	8456900000	340	P48735;P48735-2	P48735;P48735-2	Isocitrate dehydrogenase [NADP], mitochondrial	ENSG00000182054	IDH2	-1.60136	+	0.00236735	4.95491	-1.02705	30.7802	30.6209	30.6432	29.1437	29.0539	29.0426	2-oxoglutarate metabolic process;acetyl-CoA catabolic process;acetyl-CoA metabolic process;carbohydrate metabolic process;carboxylic acid metabolic process;catabolic process;cellular aldehyde metabolic process;cellular carbohydrate metabolic process;cellular catabolic process;cellular ketone metabolic process;cellular metabolic process;cellular process;coenzyme catabolic process;coenzyme metaboli…	binding;catalytic activity;cation binding;coenzyme binding;cofactor binding;ion binding;isocitrate dehydrogenase (NADP+) activity;isocitrate dehydrogenase activity;magnesium ion binding;metal ion binding;NAD binding;nucleotide binding;oxidoreductase activity;oxidoreductase activity, acting on CH-OH group of donors;oxidoreductase activity, acting on the CH-OH group of donors, NAD or NADP as accept…	cell part;cytoplasmic part;intracellular organelle lumen;intracellular organelle part;intracellular part;membrane;membrane-enclosed lumen;mitochondrial inner membrane;mitochondrial matrix;mitochondrial membrane;mitochondrial part;organelle inner membrane;organelle lumen;organelle membrane;organelle part	Carbon fixation pathways in prokaryotes;Citrate cycle (TCA cycle);Glutathione metabolism;Peroxisome		Iso_dh	3D-structure;Acetylation;Completeproteome;Diseasemutation;Glyoxylatebypass;Magnesium;Manganese;Metal-binding;Mitochondrion;NADP;Oxidoreductase;Referenceproteome;Transitpeptide;Tricarboxylicacidcycle
2948	3	3	12.4	48.6	0	19.199	125850000	14	Q14849-2;Q14849-3;Q14849	Q14849-2;Q14849-3;Q14849	StAR-related lipid transfer protein 3	ENSG00000131748	STARD3	-1.5956	+	0.00252295	3.69329	-1.0149	25.3922	25.5731	25.4299	NaN	23.8859	23.8531	alcohol metabolic process;biological regulation;biosynthetic process;C21-steroid hormone biosynthetic process;C21-steroid hormone metabolic process;cellular biosynthetic process;cellular hormone metabolic process;cellular metabolic process;cellular process;cholesterol metabolic process;cholesterol transport;establishment of localization;establishment of localization in cell;hormone biosynthetic p…	binding;cholesterol binding;cholesterol transporter activity;lipid binding;lipid transporter activity;steroid binding;sterol binding;sterol transporter activity;substrate-specific transporter activity;transporter activity	cell part;cytoplasm;cytoplasmic part;endosomal part;endosome membrane;integral to membrane;intracellular organelle part;intracellular part;intrinsic to membrane;late endosome membrane;membrane;membrane part;organelle membrane;organelle part			MENTAL;START	3D-structure;Alternativesplicing;Completeproteome;Endosome;Lipid-binding;Lipidtransport;Membrane;Phosphoprotein;Polymorphism;Referenceproteome;Steroidogenesis;Transmembrane;Transmembranehelix;Transport
4043	3	3	11.8	41.211	0	13.73	686390000	44	Q8IXU6;Q8IXU6-3;Q8IXU6-2	Q8IXU6;Q8IXU6-3	Solute carrier family 35 member F2	ENSG00000110660	SLC35F2	-1.58927	+	0.00477217	2.53549	-0.910731	27.4188	27.3331	27.2108	26.0659	25.2722	25.8568	establishment of localization;transport		cell part;integral to membrane;intrinsic to membrane;membrane part			DUF914	Acetylation;Alternativesplicing;Completeproteome;Membrane;Phosphoprotein;Referenceproteome;Transmembrane;Transmembranehelix;Transport
5021	10	10	20.5	62.022	0	50.164	2513800000	130	Q96S66;Q96S66-2;Q96S66-3;Q96S66-4	Q96S66;Q96S66-2;Q96S66-3;Q96S66-4	Chloride channel CLIC-like protein 1	ENSG00000121940	CLCC1	-1.58848	+	0.00242194	4.22564	-0.999293	29.0427	28.96	29.0122	27.549	27.2545	27.446			cell part;cytoplasmic part;endoplasmic reticulum;Golgi apparatus;integral to membrane;intracellular membrane-bounded organelle;intracellular organelle;intracellular part;intrinsic to membrane;membrane part;membrane-bounded organelle;nucleus;organelle			MCLC	Alternativesplicing;Completeproteome;Endoplasmicreticulum;Golgiapparatus;Membrane;Nucleus;Phosphoprotein;Polymorphism;Referenceproteome;Signal;Transmembrane;Transmembranehelix
6154	17	17	47.1	61.053	0	58.848	1429300000	100	Q9P0J1;Q9P0J1-2	Q9P0J1;Q9P0J1-2	[Pyruvate dehydrogenase [acetyl-transferring]]-phosphatase 1, mitochondrial	ENSG00000164951	PDP1	-1.58243	+	0.00620513	2.11164	-0.869774	27.4338	27.9912	26.9887	25.8501	26.1374	25.6789	biological regulation;carboxylic acid metabolic process;cellular ketone metabolic process;cellular macromolecule metabolic process;cellular metabolic process;cellular process;cellular protein metabolic process;dephosphorylation;macromolecule metabolic process;macromolecule modification;metabolic process;monocarboxylic acid metabolic process;organic acid metabolic process;oxoacid metabolic process…	[pyruvate dehydrogenase (lipoamide)] phosphatase activity;binding;catalytic activity;cation binding;hydrolase activity;hydrolase activity, acting on ester bonds;ion binding;metal ion binding;phosphatase activity;phosphoprotein phosphatase activity;phosphoric ester hydrolase activity;protein serine/threonine phosphatase activity	cell part;cytoplasmic part;intracellular organelle lumen;intracellular organelle part;intracellular part;membrane-enclosed lumen;mitochondrial matrix;mitochondrial part;organelle lumen;organelle part			PP2C	Acetylation;Alternativesplicing;Calcium;Completeproteome;Diseasemutation;Hydrolase;Magnesium;Metal-binding;Mitochondrion;Proteinphosphatase;Referenceproteome;Transitpeptide
3815	10	9	37.4	56.527	0	79.909	3907100000	139	Q7Z434;Q7Z434-4;Q7Z434-2	Q7Z434;Q7Z434-4	Mitochondrial antiviral-signaling protein	ENSG00000088888	MAVS	-1.57731	+	0.00257959	3.99875	-0.984864	29.7801	29.6681	29.6478	28.0232	28.307	28.034	activation of immune response;activation of innate immune response;biological regulation;cellular process;cellular response to chemical stimulus;cellular response to dsRNA;cellular response to exogenous dsRNA;cellular response to organic substance;cellular response to stimulus;defense response;defense response to bacterium;defense response to virus;immune effector process;immune response;immune s…	molecular transducer activity;signal transducer activity	cell part;cytoplasmic part;integral to membrane;intracellular membrane-bounded organelle;intracellular organelle;intracellular organelle part;intracellular part;intrinsic to membrane;membrane;membrane part;membrane-bounded organelle;microbody;microbody membrane;microbody part;mitochondrial membrane;mitochondrial outer membrane;mitochondrial part;organelle;organelle membrane;organelle outer membra…	Cytosolic DNA-sensing pathway;Hepatitis C;Measles;RIG-I-like receptor signaling pathway			3D-structure;Alternativesplicing;Antiviraldefense;Completeproteome;Host-virusinteraction;Immunity;Innateimmunity;Membrane;Mitochondrion;Mitochondrionoutermembrane;Peroxisome;Phosphoprotein;Polymorphism;Referenceproteome;Transmembrane;Transmembranehelix;Ublconjugation
3860	4	4	9.6	68.991	0	6.6131	171530000	11	Q86SR1;Q86SR1-2;Q86SR1-4;Q86SR1-3	Q86SR1;Q86SR1-2;Q86SR1-4;Q86SR1-3	Polypeptide N-acetylgalactosaminyltransferase 10	ENSG00000164574	GALNT10	-1.57688	+	0.00607849	1.98235	-0.888927	24.5941	24.0655	24.0322	NaN	22.4649	22.8426	carbohydrate metabolic process;cellular carbohydrate metabolic process;cellular macromolecule metabolic process;cellular metabolic process;cellular process;cellular protein metabolic process;glycosylation;macromolecule glycosylation;macromolecule metabolic process;macromolecule modification;metabolic process;O-glycan processing;post-translational protein modification;primary metabolic process;pro…	acetylgalactosaminyltransferase activity;binding;catalytic activity;cation binding;ion binding;metal ion binding;polypeptide N-acetylgalactosaminyltransferase activity;transferase activity;transferase activity, transferring glycosyl groups;transferase activity, transferring hexosyl groups;UDP-glycosyltransferase activity	cell part;cytoplasmic part;Golgi apparatus part;Golgi membrane;integral to membrane;intracellular organelle part;intracellular part;intrinsic to membrane;membrane;membrane part;organelle membrane;organelle part	Mucin type O-Glycan biosynthesis		Glycos_transf_2;Ricin_B_lectin	3D-structure;Alternativesplicing;Calcium;Completeproteome;Disulfidebond;Glycoprotein;Glycosyltransferase;Golgiapparatus;Lectin;Manganese;Membrane;Metal-binding;Referenceproteome;Signal-anchor;Transferase;Transmembrane;Transmembranehelix
2581	5	5	8.7	103.64	0	3.9933	229030000	14	Q07617	Q07617	Sperm-associated antigen 1	ENSG00000104450	SPAG1	-1.57376	+	0.0096801	1.35455	-0.770306	24.3975	25.2006	26.1549	24.058	23.5304	23.4433	fertilization;reproductive process;single fertilization	binding;catalytic activity;GTP binding;guanyl nucleotide binding;guanyl ribonucleotide binding;hydrolase activity;nucleotide binding;purine nucleotide binding;purine ribonucleoside triphosphate binding;purine ribonucleotide binding;ribonucleotide binding	cell part;cytoplasm;intracellular part			RPAP3_C;TPR_1	Completeproteome;Cytoplasm;Fertilization;GTP-binding;Hydrolase;Nucleotide-binding;Phosphoprotein;Polymorphism;Referenceproteome;Repeat;TPRrepeat
368	6	6	24.5	43.885	0	77.111	18249000000	323	O15533-2;O15533;O15533-3;O15533-4	O15533-2;O15533;O15533-3;O15533-4	Tapasin	ENSG00000112493;ENSG00000206208;ENSG00000206281;ENSG00000231925;ENSG00000236490	TAPBP	-1.57292	+	0.0024322	4.55695	-0.999822	31.8356	31.7617	31.8487	30.1737	30.1752	30.3784	antigen processing and presentation;antigen processing and presentation of endogenous antigen;antigen processing and presentation of endogenous peptide antigen;antigen processing and presentation of endogenous peptide antigen via MHC class I;antigen processing and presentation of exogenous antigen;antigen processing and presentation of exogenous peptide antigen;antigen processing and presentation…	active transmembrane transporter activity;antigen binding;ATPase activity;ATPase activity, coupled;ATPase activity, coupled to movement of substances;ATPase activity, coupled to transmembrane movement of substances;binding;catalytic activity;hydrolase activity;hydrolase activity, acting on acid anhydrides;hydrolase activity, acting on acid anhydrides, catalyzing transmembrane movement of substanc…	cell part;cytoplasmic part;endoplasmic reticulum part;Golgi apparatus part;Golgi membrane;integral to endoplasmic reticulum membrane;integral to lumenal side of endoplasmic reticulum membrane;integral to membrane;integral to organelle membrane;intracellular organelle part;intracellular part;intrinsic to endoplasmic reticulum membrane;intrinsic to membrane;intrinsic to organelle membrane;macromole…	Antigen processing and presentation		C1-set	3D-structure;Alternativesplicing;Completeproteome;Directproteinsequencing;Disulfidebond;Endoplasmicreticulum;Glycoprotein;Immunoglobulindomain;Membrane;Polymorphism;Referenceproteome;Signal;Transmembrane;Transmembranehelix
5626	6	6	35.4	26.56	0	16.309	910720000	37	Q9H6E4	Q9H6E4	Coiled-coil domain-containing protein 134	ENSG00000100147	CCDC134	-1.57014	+	0.00346125	3.07599	-0.93783	26.6816	27.0316	26.9321	25.591	25.1758	25.1681			extracellular region				Coiledcoil;Completeproteome;Referenceproteome;Secreted;Signal
459	46	1	43.1	131.98	0	323.31	23372000000	640	O43795;Q8N1T3-3;Q8N1T3	O43795	Unconventional myosin-Ib	ENSG00000128641	MYO1B	-1.56981	+	0.00244255	4.71006	-1.00189	31.9625	31.8458	31.9322	30.2907	30.2828	30.4576	actin cytoskeleton organization;actin filament bundle assembly;actin filament organization;actin filament-based movement;actin filament-based process;cellular component assembly;cellular component assembly at cellular level;cellular component movement;cellular component organization;cellular component organization at cellular level;cellular component organization or biogenesis;cellular component …	adenyl nucleotide binding;adenyl ribonucleotide binding;ATP binding;binding;catalytic activity;hydrolase activity;hydrolase activity, acting on acid anhydrides;hydrolase activity, acting on acid anhydrides, in phosphorus-containing anhydrides;lipid binding;microfilament motor activity;motor activity;nucleoside-triphosphatase activity;nucleotide binding;phosphatidylinositol binding;phosphatidylino…	brush border;cell part;cell projection;cytoplasm;cytoskeletal part;filopodium;intracellular organelle part;intracellular part;macromolecular complex;membrane;myosin complex;organelle part;plasma membrane;protein complex			IQ;Myosin_head;Myosin_TH1	Actin-binding;Alternativesplicing;ATP-binding;Calmodulin-binding;Completeproteome;Motorprotein;Myosin;Nucleotide-binding;Polymorphism;Referenceproteome;Repeat
5344	6	5	24.6	37.785	0	25.649	508080000	13	Q9BWT1-5;Q9BWT1;Q9BWT1-6;Q9BWT1-2;Q9BWT1-3;Q9BWT1-4	Q9BWT1-5;Q9BWT1;Q9BWT1-6;Q9BWT1-2;Q9BWT1-3	Cell division cycle-associated protein 7	ENSG00000144354	CDCA7	-1.56556	+	0.00241176	4.61367	-0.996857	26.5719	26.5941	26.3844	24.9691	24.9796	24.9049	biological regulation;biosynthetic process;cellular biosynthetic process;cellular macromolecule biosynthetic process;cellular macromolecule metabolic process;cellular metabolic process;cellular nitrogen compound metabolic process;cellular process;macromolecule biosynthetic process;macromolecule metabolic process;metabolic process;nitrogen compound metabolic process;nucleic acid metabolic process;…		cell part;intracellular membrane-bounded organelle;intracellular organelle;intracellular part;membrane-bounded organelle;nucleus;organelle			zf-4CXXC_R1	Alternativesplicing;Completeproteome;Nucleus;Phosphoprotein;Referenceproteome;Transcription;Transcriptionregulation
4765	13	13	49.7	34.358	0	29.672	1591900000	88	Q96E29-3;Q96E29-2;Q96E29	Q96E29-3;Q96E29-2;Q96E29	Transcription termination factor 3, mitochondrial	ENSG00000156469	MTERF3	-1.55604	+	0.00322222	3.30786	-0.942842	28.2855	27.9052	28.1377	26.7433	26.395	26.522	biological regulation;biosynthetic process;cellular biosynthetic process;cellular macromolecule biosynthetic process;cellular macromolecule metabolic process;cellular metabolic process;cellular nitrogen compound metabolic process;cellular process;macromolecule biosynthetic process;macromolecule metabolic process;metabolic process;negative regulation of biological process;negative regulation of bi…	binding;DNA binding;nucleic acid binding;regulatory region DNA binding;regulatory region nucleic acid binding;transcription regulatory region DNA binding	cell part;cytoplasmic part;intracellular membrane-bounded organelle;intracellular organelle;intracellular part;membrane-bounded organelle;mitochondrion;organelle			mTERF	3D-structure;Alternativesplicing;Completeproteome;Directproteinsequencing;DNA-binding;Mitochondrion;Polymorphism;Referenceproteome;Transcription;Transcriptionregulation;Transitpeptide
448	6	6	53.7	15.086	0	20.703	829940000	38	O43716	O43716	Glutamyl-tRNA(Gln) amidotransferase subunit C, mitochondrial	ENSG00000257218	GATC	-1.55557	+	0.00240671	4.74339	-0.99399	27.3894	27.3109	27.4629	25.8097	25.7628	25.9241	amine metabolic process;amino acid activation;biological regulation;biosynthetic process;carboxylic acid metabolic process;cellular amine metabolic process;cellular amino acid metabolic process;cellular biosynthetic process;cellular component organization;cellular component organization at cellular level;cellular component organization or biogenesis;cellular component organization or biogenesis a…	adenyl nucleotide binding;adenyl ribonucleotide binding;ATP binding;binding;carbon-nitrogen ligase activity, with glutamine as amido-N-donor;catalytic activity;glutaminyl-tRNA synthase (glutamine-hydrolyzing) activity;ligase activity;ligase activity, forming carbon-nitrogen bonds;nucleotide binding;purine nucleotide binding;purine ribonucleoside triphosphate binding;purine ribonucleotide binding;…	cell part;cytoplasmic part;glutamyl-tRNA(Gln) amidotransferase complex;intracellular membrane-bounded organelle;intracellular organelle;intracellular part;macromolecular complex;membrane-bounded organelle;mitochondrion;organelle;protein complex			Glu-tRNAGln	ATP-binding;Completeproteome;Ligase;Mitochondrion;Nucleotide-binding;Polymorphism;Proteinbiosynthesis;Referenceproteome;Transitpeptide
6237	7	7	35.6	33.868	0	94.458	3881800000	116	Q9UBR2	Q9UBR2	Cathepsin Z	ENSG00000101160	CTSZ	-1.55298	+	0.00237681	4.65877	-0.990342	29.4034	29.4314	29.3665	27.9494	27.7253	27.8677	anatomical structure morphogenesis;angiotensin maturation;biological regulation;branching morphogenesis of a tube;cellular macromolecule metabolic process;cellular metabolic process;cellular process;cellular protein metabolic process;developmental process;epithelial tube branching involved in lung morphogenesis;epithelial tube morphogenesis;hormone metabolic process;macromolecule metabolic proces…	catalytic activity;cysteine-type peptidase activity;hydrolase activity;peptidase activity;peptidase activity, acting on L-amino acid peptides	cell part;cytoplasmic part;endoplasmic reticulum;extracellular region part;extracellular space;intracellular membrane-bounded organelle;intracellular organelle;intracellular part;lysosome;lytic vacuole;membrane;membrane-bounded organelle;organelle;plasma membrane;vacuole	Lysosome		Peptidase_C1	3D-structure;Completeproteome;Disulfidebond;Glycoprotein;Hydrolase;Lysosome;Polymorphism;Protease;Referenceproteome;Signal;Thiolprotease;Zymogen
1065	18	9	44.9	60.801	0	171.04	8841100000	285	P07947;P08631-3;P08631-2;P08631-4;P08631	P07947	Tyrosine-protein kinase Yes	ENSG00000176105	YES1	-1.55106	+	0.00264875	3.69402	-0.957828	30.4794	30.4364	30.8034	29.0547	28.9647	29.0467	biological regulation;blood coagulation;carbohydrate transport;cell migration;cell motility;cellular component movement;cellular macromolecule metabolic process;cellular metabolic process;cellular process;cellular protein metabolic process;circulatory system process;coagulation;defense response;establishment of localization;glucose transport;hemostasis;hexose transport;immune response;immune syst…	adenyl nucleotide binding;adenyl ribonucleotide binding;ATP binding;binding;catalytic activity;kinase activity;non-membrane spanning protein tyrosine kinase activity;nucleotide binding;phosphotransferase activity, alcohol group as acceptor;protein kinase activity;protein tyrosine kinase activity;purine nucleotide binding;purine ribonucleoside triphosphate binding;purine ribonucleotide binding;rib…	cell part;cytoplasmic part;cytoskeletal part;cytosol;Golgi apparatus;intracellular membrane-bounded organelle;intracellular organelle;intracellular organelle part;intracellular part;membrane;membrane-bounded organelle;microtubule organizing center;organelle;organelle part;plasma membrane	Adherens junction;Tight junction	p21(ras)GAP-Fyn-Lyn-Yes complex, thrombin stimulated	Pkinase_Tyr;SH2;SH3_1	3D-structure;ATP-binding;Cellmembrane;Completeproteome;Cytoplasm;Cytoskeleton;Kinase;Lipoprotein;Membrane;Myristate;Nucleotide-binding;Palmitate;Phosphoprotein;Polymorphism;Proto-oncogene;Referenceproteome;SH2domain;SH3domain;Transferase;Tyrosine-proteinkinase
2400	15	15	45	50.2	0	106.5	7046400000	260	P80303-2;P80303	P80303-2;P80303	Nucleobindin-2;Nesfatin-1	ENSG00000070081	NUCB2	-1.54947	+	0.00238174	4.87376	-0.993239	30.2839	30.3437	30.2188	28.6387	28.7963	28.763		binding;calcium ion binding;cation binding;DNA binding;ion binding;metal ion binding;nucleic acid binding	cell part;cytoplasmic part;cytosol;endoplasmic reticulum;endoplasmic reticulum-Golgi intermediate compartment;extracellular region part;extracellular space;Golgi apparatus;intracellular membrane-bounded organelle;intracellular organelle;intracellular organelle part;intracellular part;membrane;membrane part;membrane-bounded organelle;nuclear membrane;nuclear outer membrane;nuclear part;organelle;o…			EF_hand_5	Alternativesplicing;Calcium;Cleavageonpairofbasicresidues;Completeproteome;Cytoplasm;Directproteinsequencing;DNA-binding;Endoplasmicreticulum;Golgiapparatus;Membrane;Metal-binding;Nucleus;Phosphoprotein;Polymorphism;Referenceproteome;Repeat;Secreted;Signal
1768	7	7	57	19.738	0	64.666	1897000000	60	P41208	P41208	Centrin-2	ENSG00000147400;ENSG00000268512	CETN2	-1.54665	+	0.00402904	3.23166	-0.93375	28.0736	27.979	28.477	26.6351	26.6855	26.569	biological regulation;cell cycle phase;cell cycle process;cell division;cellular component organization;cellular component organization at cellular level;cellular component organization or biogenesis;cellular component organization or biogenesis at cellular level;cellular macromolecule metabolic process;cellular metabolic process;cellular nitrogen compound metabolic process;cellular process;cellu…	adenyl nucleotide binding;adenyl ribonucleotide binding;ATP binding;ATPase activity;ATPase activity, coupled;ATP-dependent helicase activity;binding;calcium ion binding;catalytic activity;cation binding;helicase activity;hydrolase activity;hydrolase activity, acting on acid anhydrides;hydrolase activity, acting on acid anhydrides, in phosphorus-containing anhydrides;ion binding;metal ion binding;…	cell part;cell projection;cell projection part;centriole;cilium;cytoplasmic part;cytoskeletal part;cytosol;intracellular non-membrane-bounded organelle;intracellular organelle;intracellular organelle part;intracellular part;macromolecular complex;microtubule basal body;microtubule organizing center;microtubule organizing center part;non-membrane-bounded organelle;nonmotile primary cilium;nuclear …	Nucleotide excision repair		EF_hand_5	3D-structure;Calcium;Cellcycle;Celldivision;Completeproteome;Cytoplasm;Cytoskeleton;DNAdamage;DNArepair;Metal-binding;Mitosis;Nucleus;Phosphoprotein;Referenceproteome;Repeat
592	17	17	35.1	78.855	0	33.351	3200200000	85	O75127	O75127	Pentatricopeptide repeat-containing protein 1, mitochondrial	ENSG00000106246	PTCD1	-1.52712	+	0.00715169	1.93942	-0.827535	29.8287	29.2617	29.4727	27.5965	28.5892	27.7961	cellular macromolecule metabolic process;cellular metabolic process;cellular nitrogen compound metabolic process;cellular process;macromolecule metabolic process;metabolic process;ncRNA 3'-end processing;ncRNA metabolic process;ncRNA processing;nitrogen compound metabolic process;nucleic acid metabolic process;nucleobase-containing compound metabolic process;primary metabolic process;RNA 3'-end p…	binding;nucleic acid binding;RNA binding;tRNA binding	cell part;cytoplasmic part;intracellular organelle lumen;intracellular organelle part;intracellular part;membrane-enclosed lumen;mitochondrial matrix;mitochondrial part;organelle lumen;organelle part			PPR	Completeproteome;Mitochondrion;Polymorphism;Referenceproteome;Repeat;tRNAprocessing
4764	4	4	26.3	33.224	0	18.952	296840000	15	Q96E22	Q96E22	Dehydrodolichyl diphosphate syntase complex subunit NUS1	ENSG00000153989	NUS1	-1.52415	+	0.0043871	3.51295	-0.965117	26.3393	26.3581	26.2753	24.703	24.8971	NaN	anatomical structure formation involved in morphogenesis;angiogenesis;biological regulation;carbohydrate metabolic process;cell differentiation;cellular carbohydrate metabolic process;cellular developmental process;cellular macromolecule metabolic process;cellular metabolic process;cellular process;cellular protein metabolic process;chemical homeostasis;cholesterol transport;developmental process…	catalytic activity;transferase activity;transferase activity, transferring alkyl or aryl (other than methyl) groups	cell part;cytoplasmic part;endoplasmic reticulum membrane;endoplasmic reticulum part;integral to membrane;intracellular organelle part;intracellular part;intrinsic to membrane;membrane;membrane part;organelle membrane;organelle part			Prenyltransf	Angiogenesis;Completeproteome;Developmentalprotein;Differentiation;Endoplasmicreticulum;Glycoprotein;Membrane;Polymorphism;Receptor;Referenceproteome;Signal;Transmembrane;Transmembranehelix
6197	40	39	33.7	152.47	0	323.31	32811000000	860	Q9P2E9;Q9P2E9-2;Q9P2E9-3	Q9P2E9;Q9P2E9-2;Q9P2E9-3	Ribosome-binding protein 1	ENSG00000125844	RRBP1	-1.51418	+	0.00249802	4.84614	-0.970879	32.5275	32.4904	32.3504	30.9921	30.9101	30.9236	biological regulation;biosynthetic process;cellular biosynthetic process;cellular macromolecule biosynthetic process;cellular macromolecule metabolic process;cellular metabolic process;cellular process;cellular protein metabolic process;cellular response to stimulus;establishment of localization;establishment of protein localization;macromolecule biosynthetic process;macromolecule metabolic proce…	receptor activity	cell part;cytoplasmic part;endoplasmic reticulum part;integral to endoplasmic reticulum membrane;integral to membrane;integral to organelle membrane;intracellular non-membrane-bounded organelle;intracellular organelle;intracellular organelle part;intracellular part;intrinsic to endoplasmic reticulum membrane;intrinsic to membrane;intrinsic to organelle membrane;macromolecular complex;membrane par…	Protein processing in endoplasmic reticulum		Rib_recp_KP_reg	Alternativesplicing;Completeproteome;Endoplasmicreticulum;Membrane;Phosphoprotein;Polymorphism;Proteintransport;Referenceproteome;Repeat;Translocation;Transmembrane;Transmembranehelix;Transport
1797	4	2	39.3	9.461	0	31.965	20147000000	156	P42677	P42677	40S ribosomal protein S27	ENSG00000177954	RPS27	-1.5106		0.0161378	0.797439	-0.653645	28.692	30.7309	30.3303	NaN	28.5382	28.2761	biosynthetic process;catabolic process;cell cycle;cell proliferation;cellular biosynthetic process;cellular catabolic process;cellular component disassembly;cellular component disassembly at cellular level;cellular component organization;cellular component organization at cellular level;cellular component organization or biogenesis;cellular component organization or biogenesis at cellular level;c…	binding;cation binding;DNA binding;ion binding;metal ion binding;nucleic acid binding;structural constituent of ribosome;structural molecule activity;transition metal ion binding;zinc ion binding	cell part;cytosolic small ribosomal subunit;intracellular membrane-bounded organelle;intracellular organelle;intracellular organelle part;intracellular part;macromolecular complex;membrane-bounded organelle;nucleus;organelle;organelle part;ribonucleoprotein complex;small ribosomal subunit	Ribosome	40S ribosomal subunit, cytoplasmic;Ribosome, cytoplasmic	Ribosomal_S27e	3D-structure;Completeproteome;Directproteinsequencing;Metal-binding;Phosphoprotein;Referenceproteome;Ribonucleoprotein;Ribosomalprotein;Zinc;Zinc-finger
4130	18	18	40.4	77.293	0	41.02	1595900000	81	Q8N3R9;Q8N3R9-2	Q8N3R9;Q8N3R9-2	MAGUK p55 subfamily member 5	ENSG00000072415	MPP5	-1.50953	+	0.00616561	2.41143	-0.861851	27.7641	27.9702	28.4919	26.3327	26.7735	26.5913	anatomical structure formation involved in morphogenesis;asymmetric protein localization;cell junction assembly;cell junction organization;cell-cell junction assembly;cell-cell junction organization;cellular component assembly;cellular component assembly at cellular level;cellular component assembly involved in morphogenesis;cellular component organization;cellular component organization at cellu…		cell junction;cell part;cell-cell junction;cytoplasm;endomembrane system;intracellular part;lateral loop;macromolecular complex;membrane;myelin sheath adaxonal region;occluding junction;plasma membrane;protein complex;Schmidt-Lanterman incisure;tight junction	Tight junction	CRB1-MPP5-INADL complex;MPP4-MPP5-CRB1 complex;PAR3-PAR6-PALS1 complex;RICH1/AMOT polarity complex, Flag-Amot precipitated;RICH1/AMOT polarity complex, Flag-Rich1 precipitated	Guanylate_kin;L27;L27_N;PDZ;SH3_2	3D-structure;Alternativesplicing;Celljunction;Cellmembrane;Completeproteome;Membrane;Phosphoprotein;Referenceproteome;Repeat;SH3domain;Tightjunction
6098	3	3	16.4	35.293	0	87.895	8445700000	116	Q9NYP7;Q9NYP7-2;Q9NYP7-3	Q9NYP7;Q9NYP7-2	Elongation of very long chain fatty acids protein 5	ENSG00000012660	ELOVL5	-1.50695	+	0.00473103	3.15777	-0.908219	30.7908	30.5687	30.3271	29.0815	28.8946	29.1897	acyl-CoA biosynthetic process;acyl-CoA metabolic process;acylglycerol biosynthetic process;acylglycerol metabolic process;biosynthetic process;carboxylic acid biosynthetic process;carboxylic acid metabolic process;cellular biosynthetic process;cellular ketone metabolic process;cellular lipid metabolic process;cellular metabolic process;cellular process;coenzyme biosynthetic process;coenzyme metab…	catalytic activity;fatty acid elongase activity;fatty acid synthase activity;transferase activity;transferase activity, transferring acyl groups;transferase activity, transferring acyl groups other than amino-acyl groups	cell part;cytoplasmic part;endoplasmic reticulum membrane;endoplasmic reticulum part;integral to membrane;intracellular organelle part;intracellular part;intrinsic to membrane;membrane;membrane part;organelle membrane;organelle part	Biosynthesis of unsaturated fatty acids		ELO	Alternativesplicing;Completeproteome;Endoplasmicreticulum;Fattyacidbiosynthesis;Fattyacidmetabolism;Lipidbiosynthesis;Lipidmetabolism;Membrane;Phosphoprotein;Referenceproteome;Transferase;Transmembrane;Transmembranehelix
4959	18	17	11.8	238.27	0	54.315	1151900000	50	Q96N67-4;Q96N67-3;Q96N67-5;Q96N67-2;Q96N67-6;Q96N67;Q96N67-7	Q96N67-4;Q96N67-3;Q96N67-5;Q96N67-2;Q96N67-6;Q96N67	Dedicator of cytokinesis protein 7	ENSG00000116641	DOCK7	-1.50543	+	0.00830856	1.78608	-0.801612	27.9547	27.0746	26.8223	25.4627	25.9146	25.958	activation of Rac GTPase activity;activation of Ras GTPase activity;activation of Rho GTPase activity;anatomical structure morphogenesis;axonogenesis;biological regulation;cell part morphogenesis;cell projection morphogenesis;cell projection organization;cellular component morphogenesis;cellular component organization;cellular component organization at cellular level;cellular component organizati…	binding;enzyme binding;enzyme regulator activity;GTPase binding;GTPase regulator activity;guanyl-nucleotide exchange factor activity;nucleoside-triphosphatase regulator activity;protein binding;Rac GTPase binding;Ras GTPase binding;Rho GTPase binding;small GTPase binding	axon;basal part of cell;cell part;cell projection;cell projection part;growth cone;neuron projection;site of polarized growth			Ded_cyto;DOCK-C2;DUF3398	Acetylation;Alternativesplicing;Cellprojection;Coiledcoil;Completeproteome;Developmentalprotein;Differentiation;Guanine-nucleotidereleasingfactor;Neurogenesis;Phosphoprotein;Polymorphism;Referenceproteome
811	3	3	28.1	11.399	0	5.8991	1311700000	54	O95298-2;O95298;E9PQ53	O95298-2;O95298	NADH dehydrogenase [ubiquinone] 1 subunit C2	ENSG00000151366	NDUFC2	-1.50396	+	0.00890055	1.71027	-0.792312	26.7959	27.6426	27.1997	25.0933	25.9061	26.1269	cellular metabolic process;cellular process;electron transport chain;generation of precursor metabolites and energy;metabolic process;mitochondrial electron transport, NADH to ubiquinone;oxidation-reduction process;respiratory electron transport chain;small molecule metabolic process	catalytic activity;NADH dehydrogenase (quinone) activity;NADH dehydrogenase (ubiquinone) activity;NADH dehydrogenase activity;oxidoreductase activity;oxidoreductase activity, acting on NADH or NADPH;oxidoreductase activity, acting on NADH or NADPH, quinone or similar compound as acceptor	cell part;cytoplasmic part;integral to membrane;intracellular organelle part;intracellular part;intrinsic to membrane;macromolecular complex;membrane part;mitochondrial membrane part;mitochondrial part;mitochondrial respiratory chain complex I;NADH dehydrogenase complex;organelle part;protein complex;respiratory chain complex I	Alzheimer's disease;Huntington's disease;Oxidative phosphorylation;Parkinson's disease	Respiratory chain complex I (beta subunit) mitochondrial;Respiratory chain complex I (holoenzyme), mitochondrial	NDUF_C2	Alternativesplicing;Completeproteome;Electrontransport;Membrane;Mitochondrion;Mitochondrioninnermembrane;Polymorphism;Referenceproteome;Respiratorychain;Transmembrane;Transmembranehelix;Transport
3559	15	15	36.7	66.819	0	94.243	5879400000	202	Q6NUM9;Q6NUM9-2	Q6NUM9;Q6NUM9-2	All-trans-retinol 13,14-reductase	ENSG00000042445	RETSAT	-1.4938	+	0.00405109	3.96473	-0.934736	30.3389	30.0211	30.1974	28.7233	28.7292	28.6236	biological regulation;cellular hormone metabolic process;cellular lipid metabolic process;cellular metabolic process;cellular process;diterpenoid metabolic process;fat-soluble vitamin metabolic process;hormone metabolic process;isoprenoid metabolic process;lipid metabolic process;metabolic process;primary metabolic process;regulation of biological quality;regulation of hormone levels;retinoid met…	all-trans-retinol 13,14-reductase activity;catalytic activity;oxidoreductase activity;oxidoreductase activity, acting on the CH-CH group of donors	cell part;cytoplasmic part;endoplasmic reticulum membrane;endoplasmic reticulum part;intracellular organelle part;intracellular part;membrane;membrane part;nuclear membrane;nuclear outer membrane;nuclear part;organelle membrane;organelle outer membrane;organelle part;outer membrane	Retinol metabolism			Alternativesplicing;Completeproteome;Endoplasmicreticulum;FAD;Flavoprotein;Membrane;NAD;NADP;Oxidoreductase;Polymorphism;Referenceproteome;Signal
812	14	14	54.9	40.75	0	67.214	4581500000	183	O95299;O95299-2	O95299;O95299-2	NADH dehydrogenase [ubiquinone] 1 alpha subcomplex subunit 10, mitochondrial	ENSG00000130414	NDUFA10	-1.49212	+	0.00404372	3.98382	-0.934382	29.701	29.5486	29.6802	27.9937	28.1776	28.2822	cellular metabolic process;cellular nitrogen compound metabolic process;cellular process;electron transport chain;generation of precursor metabolites and energy;metabolic process;mitochondrial electron transport, NADH to ubiquinone;nitrogen compound metabolic process;nucleobase-containing compound metabolic process;oxidation-reduction process;primary metabolic process;respiratory electron transpo…	adenyl nucleotide binding;adenyl ribonucleotide binding;ATP binding;binding;catalytic activity;NADH dehydrogenase (quinone) activity;NADH dehydrogenase (ubiquinone) activity;NADH dehydrogenase activity;nucleotide binding;oxidoreductase activity;oxidoreductase activity, acting on NADH or NADPH;oxidoreductase activity, acting on NADH or NADPH, quinone or similar compound as acceptor;phosphotransfer…	cell part;cytoplasmic part;intracellular organelle lumen;intracellular organelle part;intracellular part;macromolecular complex;membrane part;membrane-enclosed lumen;mitochondrial matrix;mitochondrial membrane part;mitochondrial part;mitochondrial respiratory chain complex I;NADH dehydrogenase complex;organelle lumen;organelle part;protein complex;respiratory chain complex I	Alzheimer's disease;Huntington's disease;Oxidative phosphorylation;Parkinson's disease	Respiratory chain complex I (gamma subunit) mitochondrial;Respiratory chain complex I (holoenzyme), mitochondrial;Respiratory chain complex I (incomplete intermediate), mitochondrial	dNK	Acetylation;Completeproteome;Electrontransport;FAD;Flavoprotein;Mitochondrion;Polymorphism;Referenceproteome;Respiratorychain;Transitpeptide;Transport
5905	6	6	21.5	42.202	0	15.738	524460000	25	Q9NS00;Q9NS00-2	Q9NS00;Q9NS00-2	Glycoprotein-N-acetylgalactosamine 3-beta-galactosyltransferase 1	ENSG00000106392	C1GALT1	-1.49004	+	0.0047474	3.35364	-0.908484	26.5869	26.4407	26.5041	24.8759	24.8984	25.2874	anatomical structure development;anatomical structure formation involved in morphogenesis;angiogenesis;carbohydrate metabolic process;cell differentiation;cellular carbohydrate metabolic process;cellular developmental process;cellular macromolecule metabolic process;cellular metabolic process;cellular process;cellular protein metabolic process;developmental process;glycosylation;kidney developmen…	beta-1,3-galactosyltransferase activity;binding;catalytic activity;cation binding;galactosyltransferase activity;glycoprotein-N-acetylgalactosamine 3-beta-galactosyltransferase activity;ion binding;metal ion binding;transferase activity;transferase activity, transferring glycosyl groups;transferase activity, transferring hexosyl groups	cell part;cytoplasmic part;Golgi apparatus part;Golgi membrane;integral to membrane;intracellular organelle part;intracellular part;intrinsic to membrane;membrane;membrane part;organelle membrane;organelle part	Mucin type O-Glycan biosynthesis		Fringe	Alternativesplicing;Angiogenesis;Completeproteome;Developmentalprotein;Differentiation;Disulfidebond;Glycosyltransferase;Magnesium;Membrane;Metal-binding;Phosphoprotein;Referenceproteome;Signal-anchor;Transferase;Transmembrane;Transmembranehelix
212	5	5	20.1	41.522	0	148.55	3949700000	90	O00767	O00767	Acyl-CoA desaturase	ENSG00000099194	SCD	-1.48583	+	0.00423105	3.97056	-0.930244	28.9014	28.6026	28.6192	27.2288	27.2072	27.2297	biosynthetic process;carboxylic acid biosynthetic process;carboxylic acid metabolic process;cellular biosynthetic process;cellular ketone metabolic process;cellular lipid metabolic process;cellular metabolic process;cellular process;fatty acid biosynthetic process;fatty acid metabolic process;lipid biosynthetic process;lipid metabolic process;metabolic process;monocarboxylic acid metabolic proces…	binding;catalytic activity;cation binding;CoA desaturase activity;ion binding;iron ion binding;metal ion binding;oxidoreductase activity;oxidoreductase activity, acting on paired donors, with incorporation or reduction of molecular oxygen;oxidoreductase activity, acting on paired donors, with oxidation of a pair of donors resulting in the reduction of molecular oxygen to two molecules of water;st…	cell part;cytoplasmic part;endoplasmic reticulum;endoplasmic reticulum membrane;endoplasmic reticulum part;integral to membrane;intracellular membrane-bounded organelle;intracellular organelle;intracellular organelle part;intracellular part;intrinsic to membrane;membrane;membrane part;membrane-bounded organelle;organelle;organelle membrane;organelle part	Biosynthesis of unsaturated fatty acids;PPAR signaling pathway		FA_desaturase	Completeproteome;Directproteinsequencing;Endoplasmicreticulum;Fattyacidbiosynthesis;Fattyacidmetabolism;Iron;Lipidbiosynthesis;Lipidmetabolism;Membrane;Oxidoreductase;Phosphoprotein;Polymorphism;Referenceproteome;Transmembrane;Transmembranehelix
4994	7	7	26.4	41.676	0	22.361	882830000	57	Q96QE5;Q96QE5-4	Q96QE5	Transcription elongation factor, mitochondrial	ENSG00000172171	TEFM	-1.47671	+	0.00724891	2.13479	-0.82334	27.3753	27.2049	27.51	25.6162	26.4465	25.5974	biological regulation;biosynthetic process;cellular biosynthetic process;cellular component organization;cellular component organization at cellular level;cellular component organization or biogenesis;cellular component organization or biogenesis at cellular level;cellular macromolecule biosynthetic process;cellular macromolecule metabolic process;cellular metabolic process;cellular nitrogen comp…	binding;DNA polymerase processivity factor activity;enzyme regulator activity;nucleic acid binding	cell part;cytoplasmic part;intracellular non-membrane-bounded organelle;intracellular organelle;intracellular organelle part;intracellular part;macromolecular complex;mitochondrial nucleoid;mitochondrial part;non-membrane-bounded organelle;nucleoid;organelle;organelle part;ribonucleoprotein complex				Alternativesplicing;Completeproteome;Mitochondrion;Mitochondrionnucleoid;Polymorphism;Referenceproteome;Transcription;Transcriptionregulation;Transitpeptide
649	11	8	43.9	38.925	0	37.481	3326500000	79	O75477	O75477	Erlin-1	ENSG00000107566	ERLIN1	-1.47093	+	0.00444912	3.876	-0.918333	29.3845	29.4294	29.5585	28.1612	27.9018	27.8966	catabolic process;cellular catabolic process;cellular macromolecule catabolic process;cellular macromolecule metabolic process;cellular metabolic process;cellular process;ER-associated protein catabolic process;macromolecule catabolic process;macromolecule metabolic process;metabolic process;modification-dependent macromolecule catabolic process;modification-dependent protein catabolic process;pr…		cell part;cytoplasmic part;endoplasmic reticulum membrane;endoplasmic reticulum part;integral to membrane;intracellular organelle part;intracellular part;intrinsic to membrane;macromolecular complex;membrane;membrane part;organelle membrane;organelle part;protein complex			Band_7	Acetylation;Completeproteome;Directproteinsequencing;Endoplasmicreticulum;Glycoprotein;Membrane;Referenceproteome;Signal-anchor;Transmembrane;Transmembranehelix
6170	2	2	35.8	9.0564	0	39.85	1661200000	27	Q9P1F3	Q9P1F3	Costars family protein ABRACL	ENSG00000146386	ABRACL	-1.47046	+	0.00566613	3.0124	-0.880775	26.5148	26.5714	26.4156	25.3514	24.9202	24.8188							3D-structure;Acetylation;Completeproteome;Directproteinsequencing;Referenceproteome
5188	6	6	39.6	26.457	0	41.973	2520900000	67	Q9BRQ6	Q9BRQ6	MICOS complex subunit MIC25	ENSG00000159685	CHCHD6	-1.46959	+	0.0069417	2.2791	-0.832047	28.7778	28.5987	28.4321	27.3377	26.642	27.4202	cellular component organization;cellular component organization at cellular level;cellular component organization or biogenesis;cellular component organization or biogenesis at cellular level;cellular membrane organization;cellular process;cellular response to stimulus;cellular response to stress;cristae formation;inner mitochondrial membrane organization;membrane organization;mitochondrial membr…		cell part;cytoplasmic part;intracellular organelle part;intracellular part;membrane;mitochondrial inner membrane;mitochondrial membrane;mitochondrial part;organelle inner membrane;organelle membrane;organelle part			DUF737	Coiledcoil;Completeproteome;Disulfidebond;Lipoprotein;Membrane;Mitochondrion;Mitochondrioninnermembrane;Myristate;Polymorphism;Referenceproteome
469	11	11	28.1	56.883	0	23.761	756720000	36	O43824	O43824	Putative GTP-binding protein 6		GTPBP6	-1.46643	+	0.00625846	2.51566	-0.848179	27.3834	27.4846	27.4839	26.3917	25.6094	25.9514		binding;GTP binding;guanyl nucleotide binding;guanyl ribonucleotide binding;nucleotide binding;purine nucleotide binding;purine ribonucleoside triphosphate binding;purine ribonucleotide binding;ribonucleotide binding				MMR_HSR1	Completeproteome;GTP-binding;Nucleotide-binding;Referenceproteome
1452	35	35	45.3	119.09	0	177.87	11653000000	351	P23229-4;P23229-2;P23229-5;P23229-3;P23229-9;P23229-6;P23229;P23229-7	P23229-4;P23229-2;P23229-5;P23229-3;P23229-9;P23229-6;P23229;P23229-7	Integrin alpha-6;Integrin alpha-6 heavy chain;Integrin alpha-6 light chain;Processed integrin alpha-6	ENSG00000091409	ITGA6	-1.45891	+	0.00516413	3.52738	-0.898446	31.0415	30.9501	31.3299	29.7326	29.6428	29.5694	biological adhesion;biological regulation;blood coagulation;cell adhesion;cell junction assembly;cell junction organization;cell migration;cell motility;cell surface receptor linked signaling pathway;cell-substrate junction assembly;cellular component assembly;cellular component assembly at cellular level;cellular component movement;cellular component organization;cellular component organization …	binding;cation binding;ion binding;metal ion binding	cell part;integrin complex;macromolecular complex;membrane;membrane part;plasma membrane;plasma membrane part;protein complex;receptor complex	Arrhythmogenic right ventricular cardiomyopathy (ARVC);Cell adhesion molecules (CAMs);Dilated cardiomyopathy;ECM-receptor interaction;Focal adhesion;Hematopoietic cell lineage;Hypertrophic cardiomyopathy (HCM);Pathways in cancer;Regulation of actin cytoskeleton;Small cell lung cancer;Toxoplasmosis	ITGA6-ITGB1 complex;ITGA6-ITGB1-CD151 complex;ITGA6-ITGB1-CYR61 complex;ITGA6-ITGB4 complex;ITGA6-ITGB4-CD151 complex;ITGA6-ITGB4-CD9 complex;ITGA6-ITGB4-FYN complex;ITGA6-ITGB4-LAMA5 complex;ITGA6-ITGB4-Laminin10/12 complex;ITGA6-ITGB4-SHC1-GRB2 complex	Integrin_alpha2	Alternativesplicing;Calcium;Celladhesion;Cellmembrane;Cleavageonpairofbasicresidues;Completeproteome;Directproteinsequencing;Disulfidebond;Epidermolysisbullosa;Glycoprotein;Integrin;Membrane;Metal-binding;Phosphoprotein;Receptor;Referenceproteome;Repeat;Signal;Transmembrane;Transmembranehelix
5092	6	6	16.1	53.542	0	49.351	1302200000	57	Q99640-3;Q99640;Q99640-2;Q99640-4	Q99640-3;Q99640;Q99640-2;Q99640-4	Membrane-associated tyrosine- and threonine-specific cdc2-inhibitory kinase	ENSG00000127564	PKMYT1	-1.45612	+	0.00555519	3.32556	-0.888286	27.9672	27.9137	28.196	26.5812	26.7523	26.375	biological regulation;cell cycle phase;cell cycle process;cellular component organization;cellular component organization at cellular level;cellular component organization or biogenesis;cellular component organization or biogenesis at cellular level;cellular process;G1/S transition of mitotic cell cycle;G2/M transition of mitotic cell cycle;mitosis;negative regulation of catalytic activity;negati…	adenyl nucleotide binding;adenyl ribonucleotide binding;ATP binding;binding;catalytic activity;cation binding;ion binding;kinase activity;metal ion binding;nucleotide binding;phosphotransferase activity, alcohol group as acceptor;protein kinase activity;protein serine/threonine kinase activity;purine nucleotide binding;purine ribonucleoside triphosphate binding;purine ribonucleotide binding;ribon…	cell part;cytoplasmic part;endoplasmic reticulum;endoplasmic reticulum membrane;endoplasmic reticulum part;Golgi apparatus;Golgi apparatus part;Golgi membrane;intracellular membrane-bounded organelle;intracellular organelle;intracellular organelle part;intracellular part;membrane;membrane part;membrane-bounded organelle;nuclear part;nucleoplasm;organelle;organelle membrane;organelle part	Cell cycle;Oocyte meiosis;Progesterone-mediated oocyte maturation		Pkinase	3D-structure;Acetylation;Alternativesplicing;ATP-binding;Cellcycle;Completeproteome;Endoplasmicreticulum;Golgiapparatus;Kinase;Magnesium;Membrane;Metal-binding;Nucleotide-binding;Phosphoprotein;Polymorphism;Referenceproteome;Serine/threonine-proteinkinase;Transferase
4539	11	11	9.1	205.14	0	14.222	1814400000	31	Q92545	Q92545	Transmembrane protein 131	ENSG00000075568	TMEM131	-1.4523	+	0.00935829	1.8292	-0.783347	28.7354	28.0769	28.5381	26.4607	27.4792	27.0536			cell part;integral to membrane;intrinsic to membrane;membrane part			DUF3651	Completeproteome;Glycoprotein;Membrane;Phosphoprotein;Referenceproteome;Transmembrane;Transmembranehelix
5256	4	4	9.4	76.914	0	23.773	749520000	28	Q9BU23-2;Q9BU23;Q9BU23-3	Q9BU23-2;Q9BU23;Q9BU23-3	Lipase maturation factor 2	ENSG00000100258	LMF2	-1.45009	+	0.00608805	2.81047	-0.858622	27.3679	26.9907	27.5976	25.7436	25.9685	25.8939			cell part;cytoplasmic part;endoplasmic reticulum membrane;endoplasmic reticulum part;integral to membrane;intracellular organelle part;intracellular part;intrinsic to membrane;membrane;membrane part;organelle membrane;organelle part			LMF1	Alternativesplicing;Completeproteome;Endoplasmicreticulum;Glycoprotein;Membrane;Polymorphism;Referenceproteome;Transmembrane;Transmembranehelix
2207	9	1	73.5	16.961	0	226.16	74276000000	635	P60660-2	P60660-2	Myosin light polypeptide 6	ENSG00000092841	MYL6	-1.44867	+	0.00613629	2.87565	-0.86161	33.3264	33.4578	33.0365	32.0609	31.6048	31.809	actin filament-based movement;actin filament-based process;actin-mediated cell contraction;actin-myosin filament sliding;anatomical structure development;axon guidance;cellular component movement;cellular process;chemotaxis;developmental process;locomotion;muscle filament sliding;muscle tissue development;response to chemical stimulus;response to external stimulus;response to stimulus;skeletal mu…	actin-dependent ATPase activity;ATPase activity;ATPase activity, coupled;binding;calcium ion binding;catalytic activity;cation binding;hydrolase activity;hydrolase activity, acting on acid anhydrides;hydrolase activity, acting on acid anhydrides, in phosphorus-containing anhydrides;ion binding;metal ion binding;motor activity;nucleoside-triphosphatase activity;pyrophosphatase activity;structural …	cell part;cytoplasmic part;cytoskeletal part;cytosol;intracellular organelle part;intracellular part;macromolecular complex;myosin complex;organelle part;protein complex;unconventional myosin complex	Vascular smooth muscle contraction	WIP-WASp-actin-myosin-IIa complex	EF_hand_4	Acetylation;Alternativesplicing;Completeproteome;Directproteinsequencing;Motorprotein;Muscleprotein;Myosin;Phosphoprotein;Polymorphism;Referenceproteome;Repeat
1019	11	11	37.1	48.766	0	77.897	3910000000	105	P06280	P06280	Alpha-galactosidase A	ENSG00000102393;ENSG00000268815	GLA	-1.44825	+	0.00449645	4.47117	-0.921961	29.2251	29.1243	29.3053	27.7689	27.6879	27.8532	biological regulation;carbohydrate catabolic process;carbohydrate metabolic process;catabolic process;cellular carbohydrate catabolic process;cellular carbohydrate metabolic process;cellular catabolic process;cellular lipid catabolic process;cellular lipid metabolic process;cellular metabolic process;cellular process;ceramide catabolic process;ceramide metabolic process;glycolipid catabolic proce…	alpha-galactosidase activity;binding;carbohydrate binding;catalytic activity;galactosidase activity;galactoside binding;hydrolase activity;hydrolase activity, acting on glycosyl bonds;hydrolase activity, hydrolyzing O-glycosyl compounds;identical protein binding;monosaccharide binding;protein binding;protein dimerization activity;protein homodimerization activity;raffinose alpha-galactosidase act…	cell part;cytoplasmic part;extracellular region;Golgi apparatus;intracellular membrane-bounded organelle;intracellular organelle;intracellular organelle lumen;intracellular organelle part;intracellular part;lysosomal lumen;membrane-bounded organelle;membrane-enclosed lumen;organelle;organelle lumen;organelle part;vacuolar lumen;vacuolar part	Galactose metabolism;Glycerolipid metabolism;Glycosphingolipid biosynthesis - globo series;Lysosome;Sphingolipid metabolism		Melibiase	3D-structure;Completeproteome;Directproteinsequencing;Diseasemutation;Disulfidebond;Glycoprotein;Glycosidase;Hydrolase;Lysosome;Pharmaceutical;Referenceproteome;RNAediting;Signal
4308	5	5	22.4	40.251	0	162.04	9985800000	166	Q8NFJ5	Q8NFJ5	Retinoic acid-induced protein 3	ENSG00000013588	GPRC5A	-1.448	+	0.00568455	3.27063	-0.881283	30.3478	30.7232	30.7645	29.2584	29.0721	29.1611		G-protein coupled receptor activity;molecular transducer activity;receptor activity;signal transducer activity;signaling receptor activity;transmembrane signaling receptor activity	cell part;cytoplasmic part;cytoplasmic vesicle membrane;cytoplasmic vesicle part;Golgi apparatus;integral to membrane;integral to plasma membrane;intracellular membrane-bounded organelle;intracellular organelle;intracellular organelle part;intracellular part;intrinsic to membrane;intrinsic to plasma membrane;membrane;membrane part;membrane-bounded organelle;organelle;organelle membrane;organelle …			7tm_3	Cellmembrane;Completeproteome;Cytoplasmicvesicle;Glycoprotein;G-proteincoupledreceptor;Membrane;Phosphoprotein;Polymorphism;Receptor;Referenceproteome;Transducer;Transmembrane;Transmembranehelix
2863	7	7	14.3	88.8	0	24.717	662130000	32	Q14156-2;Q14156;Q14156-3	Q14156-2;Q14156;Q14156-3	Protein EFR3 homolog A	ENSG00000132294	EFR3A	-1.44509	+	0.00585806	3.19189	-0.876012	26.854	26.9631	26.9298	25.3118	25.3375	25.7624			cell part;intracellular;membrane;plasma membrane				Alternativesplicing;Cellmembrane;Completeproteome;Membrane;Phosphoprotein;Polymorphism;Referenceproteome
5688	8	8	29.7	34.47	0	53.067	6094000000	148	Q9H936;Q9H1K4	Q9H936	Mitochondrial glutamate carrier 1	ENSG00000177542	SLC25A22	-1.44498	+	0.00557355	3.48265	-0.88872	30.1181	30.1993	30.0877	28.8475	28.4512	28.7714		acidic amino acid transmembrane transporter activity;active transmembrane transporter activity;amine transmembrane transporter activity;amino acid transmembrane transporter activity;carboxylic acid transmembrane transporter activity;L-amino acid transmembrane transporter activity;L-glutamate transmembrane transporter activity;organic acid transmembrane transporter activity;secondary active transm…	cell part;cytoplasmic part;integral to membrane;intracellular membrane-bounded organelle;intracellular organelle;intracellular organelle part;intracellular part;intrinsic to membrane;membrane;membrane part;membrane-bounded organelle;mitochondrial inner membrane;mitochondrial membrane;mitochondrial part;nucleus;organelle;organelle inner membrane;organelle membrane;organelle part			Mito_carr	Completeproteome;Diseasemutation;Epilepsy;Membrane;Mitochondrion;Mitochondrioninnermembrane;Referenceproteome;Repeat;Symport;Transmembrane;Transmembranehelix;Transport
4965	3	3	29.4	19.76	0	16.309	497970000	30	Q96NT0;Q96NT0-2	Q96NT0	Coiled-coil domain-containing protein 115	ENSG00000136710	CCDC115	-1.44288	+	0.00616485	2.81053	-0.854831	27.3672	27.024	27.0067	25.5274	25.9826	25.5592			cell part;cytoplasmic part;endosome;intracellular membrane-bounded organelle;intracellular organelle;intracellular part;lysosome;lytic vacuole;membrane-bounded organelle;organelle;vacuole				Coiledcoil;Completeproteome;Endosome;Lysosome;Referenceproteome
5211	3	3	9.4	45.147	0	4.8348	273740000	8	Q9BSE4	Q9BSE4	Homocysteine-responsive endoplasmic reticulum-resident ubiquitin-like domain member 2 protein	ENSG00000122557	HERPUD2	-1.44196	+	0.00605947	2.8605	-0.857194	26.197	25.638	25.8538	24.5189	24.5523	24.2918	gamete generation;male gamete generation;multicellular organismal process;multicellular organismal reproductive process;reproductive process;response to chemical stimulus;response to organic substance;response to stimulus;response to stress;response to topologically incorrect protein;response to unfolded protein;spermatogenesis		cell part;integral to membrane;intrinsic to membrane;membrane part			ubiquitin	3D-structure;Completeproteome;Membrane;Polymorphism;Referenceproteome;Transmembrane;Transmembranehelix;Unfoldedproteinresponse
4937	12	12	55	33.909	0	32.327	921330000	59	Q96LJ7	Q96LJ7	Dehydrogenase/reductase SDR family member 1	ENSG00000157379	DHRS1	-1.44162	+	0.00544667	3.62082	-0.892199	28.1403	27.9343	27.974	26.4921	26.4636	26.7681		catalytic activity;oxidoreductase activity	cell part;cytoplasmic part;endoplasmic reticulum;intracellular membrane-bounded organelle;intracellular organelle;intracellular organelle part;intracellular part;membrane;membrane-bounded organelle;mitochondrial inner membrane;mitochondrial membrane;mitochondrial part;organelle;organelle inner membrane;organelle membrane;organelle part			adh_short	3D-structure;Completeproteome;Oxidoreductase;Polymorphism;Referenceproteome
2472	9	9	26	48.736	0	15.54	725800000	34	Q01196;Q01196-9;Q01196-10;Q01196-8;Q01196-2;Q01196-7;Q01196-4;Q01196-3;Q01196-11;Q01196-6;Q01196-5	Q01196;Q01196-9;Q01196-10;Q01196-8;Q01196-2;Q01196-7;Q01196-4;Q01196-3;Q01196-11	Runt-related transcription factor 1	ENSG00000159216	RUNX1	-1.43741		0.0112864	1.37482	-0.722999	27.5323	26.0449	26.3727	25.4682	25.3192	24.8502	anatomical structure development;anatomical structure morphogenesis;behavior;behavioral response to pain;biological regulation;biosynthetic process;cell development;cell differentiation;cell proliferation;cellular biosynthetic process;cellular developmental process;cellular macromolecule biosynthetic process;cellular macromolecule metabolic process;cellular metabolic process;cellular nitrogen com…	adenyl nucleotide binding;adenyl ribonucleotide binding;ATP binding;binding;calcium ion binding;cation binding;DNA binding;identical protein binding;ion binding;metal ion binding;nucleic acid binding;nucleic acid binding transcription factor activity;nucleotide binding;protein binding;protein dimerization activity;protein heterodimerization activity;protein homodimerization activity;purine nucleo…	basement membrane;cell part;extracellular matrix part;extracellular region part;intracellular membrane-bounded organelle;intracellular organelle;intracellular part;membrane-bounded organelle;nucleus;organelle	Acute myeloid leukemia;Chronic myeloid leukemia;Pathways in cancer	RUNX1-CBF-beta-DNA complex	Runt;RunxI	3D-structure;Acetylation;Alternativesplicing;Chloride;Chromosomalrearrangement;Completeproteome;Diseasemutation;DNA-binding;Methylation;Nucleus;Phosphoprotein;Polymorphism;Proto-oncogene;Referenceproteome;Transcription;Transcriptionregulation
5684	9	9	32	39.768	0	72.257	4949400000	108	Q9H8Y8-2;Q9H8Y8;Q9H8Y8-3	Q9H8Y8-2;Q9H8Y8;Q9H8Y8-3	Golgi reassembly-stacking protein 2	ENSG00000115806	GORASP2	-1.43579		0.010042	1.63628	-0.755392	29.7595	29.4916	29.8519	27.5562	28.8837	28.3558	cell cycle;cellular component organization;cellular component organization at cellular level;cellular component organization or biogenesis;cellular component organization or biogenesis at cellular level;cellular process;mitotic cell cycle;organelle organization		cell part;cytoplasmic part;Golgi apparatus part;Golgi membrane;intracellular organelle part;intracellular part;membrane;organelle membrane;organelle part			GRASP55_65	3D-structure;Alternativesplicing;Completeproteome;Directproteinsequencing;Golgiapparatus;Lipoprotein;Membrane;Methylation;Myristate;Palmitate;Phosphoprotein;Polymorphism;Referenceproteome
2393	11	11	24.5	93.02	0	46.703	1525700000	52	P78536;P78536-2	P78536;P78536-2	Disintegrin and metalloproteinase domain-containing protein 17	ENSG00000151694	ADAM17	-1.43279	+	0.00777273	2.18021	-0.806493	28.0804	27.9715	28.0753	26.7801	26.976	26.0728	adaptive immune response;adaptive immune response based on somatic recombination of immune receptors built from immunoglobulin superfamily domains;anatomical structure development;B cell activation;B cell differentiation;biological adhesion;biological regulation;cell activation;cell adhesion;cell adhesion mediated by integrin;cell differentiation;cell migration;cell motility;cell surface receptor…	binding;catalytic activity;cation binding;endopeptidase activity;hydrolase activity;ion binding;metal ion binding;metalloendopeptidase activity;metallopeptidase activity;peptidase activity;peptidase activity, acting on L-amino acid peptides;transition metal ion binding;zinc ion binding	actin cytoskeleton;apical plasma membrane;cell part;cell surface;cytoplasm;cytoskeleton;integral to membrane;integral to plasma membrane;intracellular non-membrane-bounded organelle;intracellular organelle;intracellular part;intrinsic to membrane;intrinsic to plasma membrane;membrane part;membrane raft;non-membrane-bounded organelle;organelle;plasma membrane part	Alzheimer's disease;Epithelial cell signaling in Helicobacter pylori infection;Notch signaling pathway		Disintegrin;Pep_M12B_propep	3D-structure;Alternativesplicing;Cleavageonpairofbasicresidues;Completeproteome;Directproteinsequencing;Disulfidebond;Glycoprotein;Hydrolase;Membrane;Metal-binding;Metalloprotease;Notchsignalingpathway;Phosphoprotein;Polymorphism;Protease;Referenceproteome;SH3-binding;Signal;Transmembrane;Transmembranehelix;Zinc;Zymogen
2597	4	4	12	70.392	0	17.305	276390000	19	Q08357	Q08357	Sodium-dependent phosphate transporter 2	ENSG00000168575	SLC20A2	-1.42915	+	0.00675229	2.75555	-0.874718	26.5437	26.3606	26.5922	24.9381	25.2013	NaN	interaction with host;interspecies interaction between organisms;multi-organism process;reproductive process;viral reproductive process;virus-host interaction	active transmembrane transporter activity;anion transmembrane transporter activity;anion:cation symporter activity;cation transmembrane transporter activity;inorganic anion transmembrane transporter activity;inorganic cation transmembrane transporter activity;inorganic phosphate transmembrane transporter activity;ion transmembrane transporter activity;metal ion transmembrane transporter activity;…	cell part;integral to membrane;integral to plasma membrane;intrinsic to membrane;intrinsic to plasma membrane;membrane part;plasma membrane part			PHO4	Cellmembrane;Completeproteome;Diseasemutation;Glycoprotein;Hostcellreceptorforvirusentry;Host-virusinteraction;Iontransport;Membrane;Phosphatetransport;Phosphoprotein;Receptor;Referenceproteome;Sodium;Sodiumtransport;Symport;Transmembrane;Transmembranehelix;Transport
3281	6	5	15.2	48.705	0	17.232	575280000	33	Q53EU6	Q53EU6	Glycerol-3-phosphate acyltransferase 3	ENSG00000138678	AGPAT9	-1.42608	+	0.00517288	4.10552	-0.899016	27.0403	26.8547	27.0239	25.6717	25.4752	25.4938	acylglycerol biosynthetic process;acylglycerol metabolic process;biological regulation;biosynthetic process;carboxylic acid biosynthetic process;carboxylic acid metabolic process;CDP-diacylglycerol biosynthetic process;CDP-diacylglycerol metabolic process;cellular biosynthetic process;cellular ketone metabolic process;cellular lipid metabolic process;cellular metabolic process;cellular process;di…	catalytic activity;glycerol-3-phosphate O-acyltransferase activity;O-acyltransferase activity;transferase activity;transferase activity, transferring acyl groups;transferase activity, transferring acyl groups other than amino-acyl groups	cell part;cytoplasmic part;endoplasmic reticulum membrane;endoplasmic reticulum part;integral to membrane;intracellular organelle part;intracellular part;intrinsic to membrane;membrane;membrane part;organelle membrane;organelle part	Glycerolipid metabolism;Glycerophospholipid metabolism		Acyltransferase	Acyltransferase;Completeproteome;Endoplasmicreticulum;Lipidbiosynthesis;Lipidmetabolism;Membrane;Phospholipidbiosynthesis;Phospholipidmetabolism;Phosphoprotein;Referenceproteome;Transferase;Transmembrane;Transmembranehelix
438	3	3	36.8	8.7341	0	5.4078	618220000	27	O43677;REV__Q2KJY2-2;REV__Q2KJY2	O43677	NADH dehydrogenase [ubiquinone] 1 subunit C1, mitochondrial	ENSG00000109390	NDUFC1	-1.41311	+	0.00853964	2.17325	-0.796565	27.0738	26.862	27.0851	25.0799	25.7443	25.9573	cellular metabolic process;cellular process;electron transport chain;generation of precursor metabolites and energy;metabolic process;mitochondrial electron transport, NADH to ubiquinone;oxidation-reduction process;respiratory electron transport chain;small molecule metabolic process	catalytic activity;NADH dehydrogenase (quinone) activity;NADH dehydrogenase (ubiquinone) activity;NADH dehydrogenase activity;oxidoreductase activity;oxidoreductase activity, acting on NADH or NADPH;oxidoreductase activity, acting on NADH or NADPH, quinone or similar compound as acceptor	cell part;cytoplasmic part;integral to membrane;intracellular organelle part;intracellular part;intrinsic to membrane;macromolecular complex;membrane part;mitochondrial membrane part;mitochondrial part;mitochondrial respiratory chain complex I;NADH dehydrogenase complex;organelle part;protein complex;respiratory chain complex I	Alzheimer's disease;Huntington's disease;Oxidative phosphorylation;Parkinson's disease	Respiratory chain complex I (gamma subunit) mitochondrial;Respiratory chain complex I (holoenzyme), mitochondrial		Completeproteome;Electrontransport;Membrane;Mitochondrion;Mitochondrioninnermembrane;Referenceproteome;Respiratorychain;Transitpeptide;Transmembrane;Transmembranehelix;Transport
3745	3	3	20.9	31.607	0	51.647	2190500000	45	Q71RG4-2;Q71RG4;Q71RG4-3	Q71RG4-2;Q71RG4;Q71RG4-3	Transmembrane and ubiquitin-like domain-containing protein 2	ENSG00000168591	TMUB2	-1.40798	+	0.00672146	2.90511	-0.841514	28.6568	28.1199	28.3749	26.8877	26.9106	27.1294			cell part;integral to membrane;intrinsic to membrane;membrane part			ubiquitin	Alternativesplicing;Completeproteome;Membrane;Polymorphism;Referenceproteome;Transmembrane;Transmembranehelix
2251	6	6	16.2	52.264	0	49.672	7409500000	116	P61619;P61619-3;Q9H9S3-2;Q9H9S3-3;Q9H9S3	P61619;P61619-3	Protein transport protein Sec61 subunit alpha isoform 1	ENSG00000058262	SEC61A1	-1.40792	+	0.0061558	3.33641	-0.861759	30.7518	30.3611	30.5823	29.2624	29.188	29.021	antigen processing and presentation;antigen processing and presentation of exogenous antigen;antigen processing and presentation of exogenous peptide antigen;antigen processing and presentation of exogenous peptide antigen via MHC class I;antigen processing and presentation of exogenous peptide antigen via MHC class I, TAP-dependent;antigen processing and presentation of peptide antigen;antigen p…	binding;ribonucleoprotein binding;ribosome binding	cell part;cytoplasmic part;endoplasmic reticulum;endoplasmic reticulum part;integral to endoplasmic reticulum membrane;integral to membrane;integral to organelle membrane;intracellular membrane-bounded organelle;intracellular organelle;intracellular organelle part;intracellular part;intrinsic to endoplasmic reticulum membrane;intrinsic to membrane;intrinsic to organelle membrane;membrane part;mem…	Phagosome;Protein export;Protein processing in endoplasmic reticulum;Vibrio cholerae infection		Plug_translocon;SecY	Alternativesplicing;Completeproteome;Endoplasmicreticulum;Membrane;Proteintransport;Referenceproteome;Translocation;Transmembrane;Transmembranehelix;Transport
6449	6	6	33.5	25.923	0	45.689	3188900000	85	Q9UMS0-3;Q9UMS0;Q9UMS0-2	Q9UMS0-3;Q9UMS0;Q9UMS0-2	NFU1 iron-sulfur cluster scaffold homolog, mitochondrial	ENSG00000169599	NFU1	-1.40641	+	0.00552787	4.06822	-0.886235	29.0655	29.1151	29.188	27.8573	27.5827	27.7094	biosynthetic process;cellular biosynthetic process;cellular metabolic process;cellular process;cofactor biosynthetic process;cofactor metabolic process;iron-sulfur cluster assembly;metabolic process;metallo-sulfur cluster assembly	4 iron, 4 sulfur cluster binding;binding;cation binding;ion binding;iron ion binding;iron-sulfur cluster binding;metal cluster binding;metal ion binding;transition metal ion binding	cell part;centrosome;cytoplasmic part;cytoskeletal part;cytosol;intracellular membrane-bounded organelle;intracellular non-membrane-bounded organelle;intracellular organelle;intracellular organelle part;intracellular part;membrane-bounded organelle;microtubule organizing center;mitochondrion;non-membrane-bounded organelle;nucleus;organelle;organelle part			Nfu_N;NifU	3D-structure;Alternativesplicing;Completeproteome;Cytoplasm;Diseasemutation;Mitochondrion;Polymorphism;Referenceproteome;Transitpeptide
2530	13	13	25.9	87.217	0	159.99	5814900000	157	Q03518	Q03518	Antigen peptide transporter 1	ENSG00000168394;ENSG00000206297;ENSG00000224212;ENSG00000226173;ENSG00000227816;ENSG00000230705;ENSG00000232367	TAP1	-1.40291	+	0.00691071	2.7594	-0.83087	30.3731	29.8365	29.909	28.8058	28.5712	28.5329	antigen processing and presentation;antigen processing and presentation of endogenous antigen;antigen processing and presentation of endogenous peptide antigen;antigen processing and presentation of endogenous peptide antigen via MHC class I;antigen processing and presentation of exogenous antigen;antigen processing and presentation of exogenous peptide antigen;antigen processing and presentation…	active transmembrane transporter activity;adenyl nucleotide binding;adenyl ribonucleotide binding;ADP binding;antigen binding;ATP binding;ATPase activity;ATPase activity, coupled;ATPase activity, coupled to movement of substances;ATPase activity, coupled to transmembrane movement of substances;binding;catalytic activity;hydrolase activity;hydrolase activity, acting on acid anhydrides;hydrolase ac…	cell part;cytoplasmic part;cytosol;endoplasmic reticulum part;intracellular membrane-bounded organelle;intracellular organelle;intracellular organelle part;intracellular part;macromolecular complex;membrane;membrane part;membrane-bounded organelle;mitochondrion;organelle;organelle part;plasma membrane;protein complex;TAP complex	ABC transporters;Antigen processing and presentation;Phagosome;Primary immunodeficiency		ABC_membrane;ABC_tran	3D-structure;Adaptiveimmunity;ATP-binding;Completeproteome;Endoplasmicreticulum;Host-virusinteraction;Immunity;Membrane;Nucleotide-binding;Peptidetransport;Polymorphism;Proteintransport;Referenceproteome;Transmembrane;Transmembranehelix;Transport
3791	20	20	30.8	100.23	0	142.25	8492500000	246	Q7Z2K6;Q7Z2K6-2	Q7Z2K6	Endoplasmic reticulum metallopeptidase 1	ENSG00000099219	ERMP1	-1.40043	+	0.0062351	3.76362	-0.873388	30.7215	30.5754	30.4095	29.2543	29.0785	29.1724	macromolecule metabolic process;metabolic process;primary metabolic process;protein metabolic process;proteolysis	binding;catalytic activity;cation binding;hydrolase activity;ion binding;metal ion binding;metallopeptidase activity;peptidase activity;peptidase activity, acting on L-amino acid peptides	cell part;cytoplasmic part;endoplasmic reticulum membrane;endoplasmic reticulum part;integral to membrane;intracellular organelle part;intracellular part;intrinsic to membrane;membrane;membrane part;organelle membrane;organelle part			Peptidase_M28	Completeproteome;Disulfidebond;Endoplasmicreticulum;Glycoprotein;Hydrolase;Membrane;Metal-binding;Metalloprotease;Polymorphism;Protease;Referenceproteome;Transmembrane;Transmembranehelix;Zinc
5810	4	4	57.8	7.7059	0	33.857	2808000000	91	Q9NPE3	Q9NPE3	H/ACA ribonucleoprotein complex subunit 3	ENSG00000182117	NOP10	-1.39336		0.0197195	0.787582	-0.601507	28.5614	28.4552	28.1447	25.4693	27.2978	28.2142	cellular macromolecule metabolic process;cellular metabolic process;cellular nitrogen compound metabolic process;cellular process;macromolecule metabolic process;macromolecule modification;metabolic process;ncRNA metabolic process;ncRNA processing;nitrogen compound metabolic process;nucleic acid metabolic process;nucleobase-containing compound metabolic process;primary metabolic process;pseudouri…		Cajal body;cell part;intracellular non-membrane-bounded organelle;intracellular organelle;intracellular organelle part;intracellular part;macromolecular complex;non-membrane-bounded organelle;nuclear body;nuclear part;nucleolus;nucleoplasm part;organelle;organelle part;ribonucleoprotein complex;small nucleolar ribonucleoprotein complex	Ribosome biogenesis in eukaryotes		Nop10p	Completeproteome;Diseasemutation;Dyskeratosiscongenita;Nucleus;Referenceproteome;Ribonucleoprotein;Ribosomebiogenesis;rRNAprocessing
6484	17	17	19.9	121.85	0	30.154	666310000	44	Q9UPN4-2;Q9UPN4;Q9UPN4-3	Q9UPN4-2;Q9UPN4;Q9UPN4-3	Centrosomal protein of 131 kDa	ENSG00000141577	CEP131	-1.38782	+	0.00713069	2.82645	-0.826574	27.1248	26.7878	26.5583	25.3228	25.4194	25.5653	cell cycle process;cell differentiation;cellular developmental process;cellular process;developmental process;G2/M transition of mitotic cell cycle;gamete generation;male gamete generation;multicellular organismal development;multicellular organismal process;multicellular organismal reproductive process;reproductive process;spermatogenesis		cell part;centrosome;cytoplasmic part;cytoskeletal part;cytosol;intracellular membrane-bounded organelle;intracellular non-membrane-bounded organelle;intracellular organelle;intracellular organelle part;intracellular part;membrane-bounded organelle;microtubule organizing center;non-membrane-bounded organelle;organelle;organelle part				Alternativesplicing;Completeproteome;Cytoplasm;Cytoskeleton;Developmentalprotein;Differentiation;Phosphoprotein;Polymorphism;Referenceproteome;Spermatogenesis
3955	9	9	33.1	44.128	0	38.862	1319000000	57	Q86YH6;Q86YH6-2	Q86YH6;Q86YH6-2	Decaprenyl-diphosphate synthase subunit 2	ENSG00000164494	PDSS2	-1.38433	+	0.00614603	3.69424	-0.8617	28.0252	27.8939	27.9487	26.5065	26.767	26.4414	biological regulation;biosynthetic process;cellular biosynthetic process;cellular component assembly;cellular component organization;cellular component organization or biogenesis;cellular ketone metabolic process;cellular lipid metabolic process;cellular metabolic process;cellular process;coenzyme biosynthetic process;coenzyme metabolic process;cofactor biosynthetic process;cofactor metabolic pro…	binding;catalytic activity;protein binding;protein dimerization activity;protein heterodimerization activity;transferase activity;transferase activity, transferring alkyl or aryl (other than methyl) groups;trans-hexaprenyltranstransferase activity;trans-octaprenyltranstransferase activity	cell part;cytoplasmic part;intracellular organelle lumen;intracellular organelle part;intracellular part;membrane-enclosed lumen;mitochondrial matrix;mitochondrial part;organelle lumen;organelle part	Terpenoid backbone biosynthesis		polyprenyl_synt	Alternativesplicing;Completeproteome;Diseasemutation;Isoprenebiosynthesis;Mitochondrion;Polymorphism;Referenceproteome;Transferase;Ubiquinonebiosynthesis
2578	65	4	54.9	195.46	0	323.31	29210000000	985	Q07157	Q07157	Tight junction protein ZO-1	ENSG00000104067	TJP1	-1.38405	+	0.0057031	4.45501	-0.882496	32.0705	31.9611	32.1341	30.7626	30.616	30.635	anatomical structure formation involved in morphogenesis;biological regulation;blastocyst formation;carbohydrate homeostasis;cell junction assembly;cell junction organization;cell-cell junction assembly;cell-cell junction organization;cellular chemical homeostasis;cellular component assembly;cellular component assembly at cellular level;cellular component disassembly;cellular component disassembl…		adherens junction;anchoring junction;apical part of cell;apicolateral plasma membrane;basolateral plasma membrane;cell junction;cell part;cell-cell adherens junction;cell-cell contact zone;cell-cell junction;cytoplasmic part;cytosol;gap junction;intercalated disc;intercellular canaliculus;intracellular membrane-bounded organelle;intracellular organelle;intracellular part;membrane part;membrane-bo…	Adherens junction;Epithelial cell signaling in Helicobacter pylori infection;Gap junction;Tight junction;Vibrio cholerae infection	Alpha-dystrobrevin-ZO-1-actin complex;CF IIAm complex (Cleavage factor IIAm complex);ZO1-(beta)cadherin-(VE)cadherin-VEGFR2 complex	Guanylate_kin;PDZ;SH3_2;ZU5	3D-structure;Alternativesplicing;Calmodulin-binding;Celljunction;Cellmembrane;Completeproteome;Gapjunction;Membrane;Phosphoprotein;Polymorphism;Referenceproteome;Repeat;SH3domain;Tightjunction
3260	2	2	4.9	46.8	0	3.5035	192150000	19	Q4G148-2;Q4G148	Q4G148-2;Q4G148	Glucoside xylosyltransferase 1	ENSG00000151233	GXYLT1	-1.3836	+	0.0084234	2.37653	-0.797168	25.9605	25.3209	25.4281	24.0956	24.4391	24.024	amine metabolic process;aminoglycan metabolic process;carbohydrate metabolic process;cellular carbohydrate metabolic process;cellular macromolecule metabolic process;cellular metabolic process;cellular process;cellular protein metabolic process;chondroitin sulfate metabolic process;glycosaminoglycan metabolic process;glycosylation;macromolecule glycosylation;macromolecule metabolic process;macrom…	catalytic activity;transferase activity;transferase activity, transferring glycosyl groups;transferase activity, transferring pentosyl groups;UDP-glycosyltransferase activity;UDP-xylosyltransferase activity;xylosyltransferase activity	cell part;cytoplasmic part;Golgi apparatus part;Golgi membrane;integral to membrane;intracellular organelle part;intracellular part;intrinsic to membrane;membrane;membrane part;organelle membrane;organelle part	Other types of O-glycan biosynthesis		Glyco_transf_8	Alternativesplicing;Completeproteome;Glycoprotein;Glycosyltransferase;Membrane;Phosphoprotein;Referenceproteome;Signal-anchor;Transferase;Transmembrane;Transmembranehelix
1709	8	8	37.6	26.145	0	53.104	3356800000	95	P36543;P36543-3;P36543-2;Q96A05	P36543;P36543-3;P36543-2	V-type proton ATPase subunit E 1	ENSG00000131100	ATP6V1E1	-1.38188		0.0101748	1.8057	-0.750086	29.1075	28.1212	29.0893	27.4656	27.5233	27.1835	ATP hydrolysis coupled proton transport;biological regulation;cation homeostasis;cation transport;cell surface receptor linked signaling pathway;cellular cation homeostasis;cellular chemical homeostasis;cellular component organization;cellular component organization at cellular level;cellular component organization or biogenesis;cellular component organization or biogenesis at cellular level;cell…	active transmembrane transporter activity;ATPase activity;ATPase activity, coupled;ATPase activity, coupled to movement of substances;ATPase activity, coupled to transmembrane movement of ions;ATPase activity, coupled to transmembrane movement of ions, phosphorylative mechanism;ATPase activity, coupled to transmembrane movement of substances;catalytic activity;cation transmembrane transporter act…	apical plasma membrane;cell part;cell projection;cytoplasmic part;cytosol;endosome;intracellular membrane-bounded organelle;intracellular organelle;intracellular part;macromolecular complex;membrane part;membrane-bounded organelle;microvillus;mitochondrion;organelle;plasma membrane part;protein complex;proton-transporting two-sector ATPase complex;proton-transporting two-sector ATPase complex, ca…	Collecting duct acid secretion;Epithelial cell signaling in Helicobacter pylori infection;Oxidative phosphorylation;Phagosome;Rheumatoid arthritis;Vibrio cholerae infection		vATP-synt_E	Acetylation;Alternativesplicing;Completeproteome;Directproteinsequencing;Hydrogeniontransport;Hydrolase;Iontransport;Phosphoprotein;Polymorphism;Referenceproteome;Transport
5611	7	7	24.3	47.091	0	17.372	747770000	26	Q9H553;Q9H553-2	Q9H553;Q9H553-2	Alpha-1,3/1,6-mannosyltransferase ALG2	ENSG00000119523	ALG2	-1.37972	+	0.00985551	1.94806	-0.762176	27.2866	27.0967	26.8129	25.551	25.2857	26.2202	biosynthetic process;carbohydrate biosynthetic process;carbohydrate metabolic process;cellular carbohydrate metabolic process;cellular macromolecule metabolic process;cellular metabolic process;cellular process;cellular protein metabolic process;dolichol-linked oligosaccharide biosynthetic process;glycosylation;macromolecule glycosylation;macromolecule metabolic process;macromolecule modification…	alpha-1,3-mannosyltransferase activity;alpha-1,6-mannosyltransferase activity;binding;calcium-dependent protein binding;catalytic activity;glycolipid 3-alpha-mannosyltransferase activity;glycolipid 6-alpha-mannosyltransferase activity;glycolipid mannosyltransferase activity;mannosyltransferase activity;protein anchor;protein binding;transferase activity;transferase activity, transferring glycosyl…	cell part;cytoplasmic part;endoplasmic reticulum membrane;endoplasmic reticulum part;integral to membrane;intracellular membrane-bounded organelle;intracellular organelle;intracellular organelle part;intracellular part;intrinsic to membrane;membrane;membrane part;membrane-bounded organelle;nucleus;organelle;organelle membrane;organelle part;perinuclear region of cytoplasm	N-Glycan biosynthesis;Various types of N-glycan biosynthesis		Glycos_transf_1	Alternativesplicing;Completeproteome;Congenitaldisorderofglycosylation;Glycosyltransferase;Membrane;Polymorphism;Referenceproteome;Transferase;Transmembrane;Transmembranehelix
1924	16	11	36.2	56.888	0	39.052	2977900000	116	P49590;P49590-2	P49590;P49590-2	Probable histidine--tRNA ligase, mitochondrial	ENSG00000112855	HARS2	-1.37556	+	0.00786207	2.6999	-0.813142	29.0221	29.0043	28.9076	27.2326	27.8491	27.7256	amine metabolic process;amino acid activation;carboxylic acid metabolic process;cellular amine metabolic process;cellular amino acid metabolic process;cellular ketone metabolic process;cellular macromolecule metabolic process;cellular metabolic process;cellular nitrogen compound metabolic process;cellular process;histidyl-tRNA aminoacylation;macromolecule metabolic process;metabolic process;ncRNA…	adenyl nucleotide binding;adenyl ribonucleotide binding;aminoacyl-tRNA ligase activity;ATP binding;binding;catalytic activity;histidine-tRNA ligase activity;ligase activity;ligase activity, forming aminoacyl-tRNA and related compounds;ligase activity, forming carbon-oxygen bonds;nucleotide binding;purine nucleotide binding;purine ribonucleoside triphosphate binding;purine ribonucleotide binding;r…	cell part;cytoplasmic part;intracellular organelle lumen;intracellular organelle part;intracellular part;membrane-enclosed lumen;mitochondrial matrix;mitochondrial part;organelle lumen;organelle part	Aminoacyl-tRNA biosynthesis		HGTP_anticodon;tRNA-synt_2b	Acetylation;Aminoacyl-tRNAsynthetase;ATP-binding;Completeproteome;Deafness;Diseasemutation;Ligase;Mitochondrion;Nucleotide-binding;Phosphoprotein;Proteinbiosynthesis;Referenceproteome;Transitpeptide
1951	16	16	54.3	49.867	0	126.28	10094000000	294	P49821-2;P49821	P49821-2;P49821	NADH dehydrogenase [ubiquinone] flavoprotein 1, mitochondrial	ENSG00000167792	NDUFV1	-1.37427	+	0.00687879	3.20305	-0.837285	30.865	30.9107	30.74	29.6238	29.2028	29.5663	cellular metabolic process;cellular process;electron transport chain;generation of precursor metabolites and energy;metabolic process;mitochondrial electron transport, NADH to ubiquinone;oxidation-reduction process;respiratory electron transport chain;small molecule metabolic process	4 iron, 4 sulfur cluster binding;binding;catalytic activity;cation binding;coenzyme binding;cofactor binding;FMN binding;ion binding;iron-sulfur cluster binding;metal cluster binding;metal ion binding;NAD binding;NADH dehydrogenase (quinone) activity;NADH dehydrogenase (ubiquinone) activity;NADH dehydrogenase activity;nucleotide binding;oxidoreductase activity;oxidoreductase activity, acting on N…	cell part;cytoplasmic part;intracellular organelle part;intracellular part;macromolecular complex;membrane part;mitochondrial membrane part;mitochondrial part;mitochondrial respiratory chain complex I;NADH dehydrogenase complex;organelle part;protein complex;respiratory chain complex I	Alzheimer's disease;Huntington's disease;Oxidative phosphorylation;Parkinson's disease	Respiratory chain complex I (holoenzyme), mitochondrial;Respiratory chain complex I (incomplete intermediate), mitochondrial;Respiratory chain complex I (lambda subunit) mitochondrial	Complex1_51K;NADH_4Fe-4S;SLBB	4Fe-4S;Acetylation;Alternativesplicing;Completeproteome;Diseasemutation;Electrontransport;Flavoprotein;FMN;Iron;Iron-sulfur;Leighsyndrome;Membrane;Metal-binding;Mitochondrion;Mitochondrioninnermembrane;NAD;Oxidoreductase;Polymorphism;Referenceproteome;Respiratorychain;Transitpeptide;Transport;Ubiquinone
1430	13	13	27.1	89.42	0	182.37	2581900000	87	P22059;Q969R2-5;Q969R2-4;Q969R2-6;Q969R2-3;Q969R2-2;Q969R2	P22059	Oxysterol-binding protein 1	ENSG00000110048	OSBP	-1.36832		0.0152039	1.11764	-0.679334	NaN	28.335	27.47	27.0716	25.9967	26.5341	establishment of localization;lipid transport;organic substance transport;transport	binding;lipid binding;oxysterol binding;phospholipid binding;steroid binding;sterol binding	cell part;cytoplasmic part;Golgi apparatus part;Golgi membrane;intracellular organelle part;intracellular part;membrane;organelle membrane;organelle part			Oxysterol_BP;PH	3D-structure;Acetylation;Coiledcoil;Completeproteome;Cytoplasm;Golgiapparatus;Lipid-binding;Lipidtransport;Membrane;Phosphoprotein;Polymorphism;Referenceproteome;Transport
2136	28	0	24.2	197.65	0	121.77	2904900000	129	P55196-3	P55196-3	Afadin	ENSG00000130396	MLLT4	-1.36827	+	0.00978113	1.99089	-0.760578	28.1244	27.682	28.7074	26.8593	26.7393	26.8103	adherens junction organization;biological adhesion;biological regulation;cell adhesion;cell communication;cell junction assembly;cell junction organization;cell-cell junction organization;cell-cell signaling;cellular component assembly;cellular component assembly at cellular level;cellular component organization;cellular component organization at cellular level;cellular component organization or …	binding;protein binding;protein C-terminus binding	adherens junction;anchoring junction;apical part of cell;cell junction;cell part;cell-cell adherens junction;cell-cell junction;cytoplasmic part;cytosol;intracellular membrane-bounded organelle;intracellular organelle;intracellular part;membrane;membrane-bounded organelle;nucleus;organelle;plasma membrane	Adherens junction;Leukocyte transendothelial migration;Tight junction		DIL;FHA;PDZ;RA	3D-structure;Alternativesplicing;Celladhesion;Celljunction;Chromosomalrearrangement;Coiledcoil;Completeproteome;Phosphoprotein;Proto-oncogene;Referenceproteome;Repeat
6483	63	0	16.2	614.15	0	140.83	4014100000	198	Q9UPN3-3;Q9UPN3-2	Q9UPN3-3;Q9UPN3-2	Microtubule-actin cross-linking factor 1, isoforms 1/2/3/5	ENSG00000127603	MACF1	-1.36637	+	0.00923483	2.21329	-0.777148	27.8068	27.8292	27.4689	26.7958	26.1197	26.0905	anatomical structure formation involved in morphogenesis;biological regulation;cell cycle arrest;cell cycle process;cell surface receptor linked signaling pathway;cellular component movement;cellular process;cellular response to stimulus;developmental process;establishment of localization;establishment of localization in cell;establishment of protein localization;establishment of protein localiza…	actin binding;actin filament binding;ATPase activity;binding;calcium ion binding;catalytic activity;cation binding;cytoskeletal protein binding;hydrolase activity;hydrolase activity, acting on acid anhydrides;hydrolase activity, acting on acid anhydrides, in phosphorus-containing anhydrides;ion binding;metal ion binding;microtubule binding;nucleoside-triphosphatase activity;protein binding;pyroph…	actin cytoskeleton;cell part;cell projection membrane;cell projection part;cytoplasmic part;cytoskeletal part;cytoskeleton;Golgi apparatus;intracellular membrane-bounded organelle;intracellular non-membrane-bounded organelle;intracellular organelle;intracellular organelle part;intracellular part;leading edge membrane;macromolecular complex;membrane part;membrane-bounded organelle;microtubule;non-…			CH;EF_hand_5;GAS2;Plectin;Spectrin	Acetylation;Actin-binding;Alternativesplicing;Calcium;Cellmembrane;Cellprojection;Completeproteome;Cytoplasm;Cytoskeleton;Golgiapparatus;Leucine-richrepeat;Membrane;Metal-binding;Microtubule;Phosphoprotein;Polymorphism;Referenceproteome;Repeat;SH3domain;Wntsignalingpathway
4242	9	9	35.5	47.576	0	29.275	1020200000	52	Q8NBZ7;Q8NBZ7-2;Q8NBZ7-3	Q8NBZ7;Q8NBZ7-2;Q8NBZ7-3	UDP-glucuronic acid decarboxylase 1	ENSG00000115652	UXS1	-1.36538	+	0.00785079	2.77896	-0.812112	27.649	27.4046	27.757	26.2086	26.5085	25.9974	alcohol biosynthetic process;alcohol metabolic process;biosynthetic process;carbohydrate biosynthetic process;carbohydrate metabolic process;cellular biosynthetic process;cellular carbohydrate biosynthetic process;cellular carbohydrate metabolic process;cellular metabolic process;cellular nitrogen compound metabolic process;cellular process;D-xylose biosynthetic process;D-xylose metabolic process…	binding;carbon-carbon lyase activity;carboxy-lyase activity;catalytic activity;coenzyme binding;cofactor binding;lyase activity;UDP-glucuronate decarboxylase activity	cell part;cytoplasmic part;Golgi apparatus part;Golgi cisterna membrane;Golgi membrane;integral to membrane;intracellular membrane-bounded organelle;intracellular organelle;intracellular organelle part;intracellular part;intrinsic to membrane;membrane;membrane part;membrane-bounded organelle;mitochondrion;organelle;organelle membrane;organelle part	Amino sugar and nucleotide sugar metabolism;Starch and sucrose metabolism		Epimerase;UXS1_N	3D-structure;Alternativesplicing;Completeproteome;Decarboxylase;Glycoprotein;Golgiapparatus;Lyase;Membrane;NAD;Phosphoprotein;Referenceproteome;Signal-anchor;Transmembrane;Transmembranehelix
6619	8	8	45.9	26.005	0	44.945	5488500000	113	Q9Y3A6;Q9Y3A6-2	Q9Y3A6;Q9Y3A6-2	Transmembrane emp24 domain-containing protein 5	ENSG00000117500	TMED5	-1.35337	+	0.00742525	3.13506	-0.822737	29.974	29.8026	29.9595	28.3894	28.8236	28.4629	cellular component organization;cellular component organization at cellular level;cellular component organization or biogenesis;cellular component organization or biogenesis at cellular level;cellular process;establishment of localization;establishment of protein localization;Golgi organization;Golgi ribbon formation;organelle organization;protein transport;transport		cell part;cis-Golgi network;cytoplasmic part;endoplasmic reticulum exit site;endoplasmic reticulum membrane;endoplasmic reticulum part;endoplasmic reticulum-Golgi intermediate compartment;endoplasmic reticulum-Golgi intermediate compartment membrane;Golgi apparatus;Golgi apparatus part;integral to membrane;intracellular membrane-bounded organelle;intracellular organelle;intracellular organelle pa…			EMP24_GP25L	Alternativesplicing;Completeproteome;Endoplasmicreticulum;Golgiapparatus;Membrane;Polymorphism;Proteintransport;Referenceproteome;Signal;Transmembrane;Transmembranehelix;Transport
4546	5	5	22	56.777	0	165.24	3748500000	125	Q92575	Q92575	UBX domain-containing protein 4	ENSG00000144224	UBXN4	-1.35074	+	0.00888828	2.56166	-0.792262	29.8104	29.5353	29.696	28.5788	28.451	27.9596	response to chemical stimulus;response to organic substance;response to stimulus;response to stress;response to topologically incorrect protein;response to unfolded protein		cell part;cytoplasmic part;endoplasmic reticulum;endoplasmic reticulum membrane;endoplasmic reticulum part;envelope;intracellular membrane-bounded organelle;intracellular organelle;intracellular organelle part;intracellular part;membrane;membrane part;membrane-bounded organelle;nuclear envelope;nuclear part;nucleus;organelle;organelle envelope;organelle membrane;organelle part			UBX	3D-structure;Completeproteome;Endoplasmicreticulum;Membrane;Nucleus;Phosphoprotein;Polymorphism;Referenceproteome;Unfoldedproteinresponse
445	5	5	26.9	24.212	0	15.375	1029900000	44	O43708;O43708-2;O43708-3	O43708;O43708-2;O43708-3	Maleylacetoacetate isomerase	ENSG00000100577	GSTZ1	-1.3501	+	0.00891599	2.48064	-0.787047	27.4018	27.1682	27.4237	26.0202	25.6181	26.3051	amine catabolic process;amine metabolic process;aromatic amino acid family catabolic process;aromatic amino acid family metabolic process;aromatic compound catabolic process;carboxylic acid catabolic process;carboxylic acid metabolic process;catabolic process;cellular amine metabolic process;cellular amino acid catabolic process;cellular amino acid metabolic process;cellular aromatic compound met…	antioxidant activity;catalytic activity;cis-trans isomerase activity;glutathione peroxidase activity;glutathione transferase activity;isomerase activity;maleylacetoacetate isomerase activity;oxidoreductase activity;oxidoreductase activity, acting on peroxide as acceptor;peroxidase activity;transferase activity;transferase activity, transferring alkyl or aryl (other than methyl) groups	cell part;cytoplasmic part;cytosol;intracellular membrane-bounded organelle;intracellular organelle;intracellular part;membrane-bounded organelle;mitochondrion;organelle	Drug metabolism - cytochrome P450;Glutathione metabolism;Metabolism of xenobiotics by cytochrome P450;Styrene degradation;Tyrosine metabolism		GST_C	3D-structure;Acetylation;Alternativesplicing;Completeproteome;Cytoplasm;Isomerase;Multifunctionalenzyme;Phenylalaninecatabolism;Polymorphism;Referenceproteome;Transferase;Tyrosinecatabolism
4847	18	18	52.1	66.59	0	76.353	3689800000	155	Q96GW9	Q96GW9	Methionine--tRNA ligase, mitochondrial	ENSG00000247626	MARS2	-1.34851	+	0.00615528	4.18487	-0.854628	29.3483	29.1416	29.2604	27.8046	27.9304	27.9697	amine metabolic process;amino acid activation;carboxylic acid metabolic process;cellular amine metabolic process;cellular amino acid metabolic process;cellular ketone metabolic process;cellular macromolecule metabolic process;cellular metabolic process;cellular nitrogen compound metabolic process;cellular process;macromolecule metabolic process;metabolic process;methionyl-tRNA aminoacylation;ncRN…	adenyl nucleotide binding;adenyl ribonucleotide binding;aminoacyl-tRNA ligase activity;ATP binding;binding;catalytic activity;ligase activity;ligase activity, forming aminoacyl-tRNA and related compounds;ligase activity, forming carbon-oxygen bonds;methionine-tRNA ligase activity;nucleotide binding;purine nucleotide binding;purine ribonucleoside triphosphate binding;purine ribonucleotide binding;…	cell part;cytoplasmic part;intracellular organelle lumen;intracellular organelle part;intracellular part;membrane-enclosed lumen;mitochondrial matrix;mitochondrial part;organelle lumen;organelle part	Aminoacyl-tRNA biosynthesis;Selenocompound metabolism		tRNA-synt_1g	Aminoacyl-tRNAsynthetase;ATP-binding;Completeproteome;Ligase;Mitochondrion;Nucleotide-binding;Proteinbiosynthesis;Referenceproteome;Transitpeptide
3993	13	13	53.3	42.961	0	99.539	3490500000	138	Q8IVS2;Q8IVS2-2	Q8IVS2	Malonyl-CoA-acyl carrier protein transacylase, mitochondrial	ENSG00000100294	MCAT	-1.34685	+	0.00674198	3.81784	-0.84369	29.5166	29.2092	29.4502	28.0915	28.0121	28.0319	biosynthetic process;carboxylic acid biosynthetic process;carboxylic acid metabolic process;cellular biosynthetic process;cellular ketone metabolic process;cellular lipid metabolic process;cellular metabolic process;cellular process;fatty acid biosynthetic process;fatty acid metabolic process;lipid biosynthetic process;lipid metabolic process;metabolic process;monocarboxylic acid metabolic proces…	[acyl-carrier-protein] S-malonyltransferase activity;catalytic activity;fatty acid synthase activity;malonyltransferase activity;S-acyltransferase activity;S-malonyltransferase activity;transferase activity;transferase activity, transferring acyl groups;transferase activity, transferring acyl groups other than amino-acyl groups	cell part;cytoplasmic part;intracellular membrane-bounded organelle;intracellular organelle;intracellular part;membrane-bounded organelle;mitochondrion;organelle	Fatty acid biosynthesis		Acyl_transf_1	3D-structure;Alternativesplicing;Completeproteome;Fattyacidbiosynthesis;Fattyacidmetabolism;Lipidbiosynthesis;Lipidmetabolism;Mitochondrion;Polymorphism;Referenceproteome;Transferase;Transitpeptide
704	4	4	14.8	55.278	0	13.247	464010000	32	O75907	O75907	Diacylglycerol O-acyltransferase 1	ENSG00000185000;ENSG00000261698	DGAT1	-1.34665	+	0.00697297	3.51942	-0.83393	26.1806	26.2896	26.1623	24.8381	24.692	25.0625	acyl-CoA metabolic process;acylglycerol biosynthetic process;acylglycerol metabolic process;biological regulation;biosynthetic process;cellular biosynthetic process;cellular component assembly;cellular component organization;cellular component organization or biogenesis;cellular lipid metabolic process;cellular metabolic process;cellular process;chemical homeostasis;coenzyme metabolic process;cof…	2-acylglycerol O-acyltransferase activity;acylglycerol O-acyltransferase activity;catalytic activity;diacylglycerol O-acyltransferase activity;O-acyltransferase activity;retinol O-fatty-acyltransferase activity;transferase activity;transferase activity, transferring acyl groups;transferase activity, transferring acyl groups other than amino-acyl groups	cell part;cytoplasmic part;endoplasmic reticulum membrane;endoplasmic reticulum part;integral to membrane;intracellular organelle part;intracellular part;intrinsic to membrane;membrane;membrane part;organelle membrane;organelle part	Fat digestion and absorption;Glycerolipid metabolism;Retinol metabolism		MBOAT	Acyltransferase;Completeproteome;Endoplasmicreticulum;Membrane;Phosphoprotein;Referenceproteome;Transferase;Transmembrane;Transmembranehelix
719	31	31	31.9	152.93	0	147.11	5452600000	280	O75976;O75976-2	O75976;O75976-2	Carboxypeptidase D	ENSG00000108582	CPD	-1.34135	+	0.00614574	4.3355	-0.853832	29.9475	29.738	29.8016	28.4237	28.4971	28.5422	macromolecule metabolic process;metabolic process;primary metabolic process;protein metabolic process;proteolysis	binding;carboxypeptidase activity;catalytic activity;cation binding;exopeptidase activity;hydrolase activity;ion binding;metal ion binding;metallocarboxypeptidase activity;metalloexopeptidase activity;metallopeptidase activity;peptidase activity;peptidase activity, acting on L-amino acid peptides;serine hydrolase activity;serine-type carboxypeptidase activity;serine-type exopeptidase activity;ser…	cell part;integral to membrane;intrinsic to membrane;membrane;membrane part			Peptidase_M14	Alternativesplicing;Carboxypeptidase;Completeproteome;Glycoprotein;Hydrolase;Lipoprotein;Membrane;Metal-binding;Metalloprotease;Palmitate;Phosphoprotein;Polymorphism;Protease;Referenceproteome;Repeat;Signal;Transmembrane;Transmembranehelix;Zinc
3388	10	10	14.4	114.8	0	11.486	291750000	17	Q5T0W9	Q5T0W9	Protein FAM83B	ENSG00000168143	FAM83B	-1.34114		0.0101871	1.99765	-0.775202	26.4441	26.4901	26.4577	24.8151	25.4306	NaN						DUF1669	Completeproteome;Phosphoprotein;Polymorphism;Referenceproteome
821	10	10	30.5	61.438	0	34.946	1653600000	131	O95365	O95365	Zinc finger and BTB domain-containing protein 7A	ENSG00000178951	ZBTB7A	-1.33588		0.0120042	1.44923	-0.692798	28.4739	27.4895	28.3961	26.7459	27.3025	26.3034	biological regulation;biosynthetic process;cell differentiation;cellular biosynthetic process;cellular developmental process;cellular macromolecule biosynthetic process;cellular macromolecule metabolic process;cellular metabolic process;cellular nitrogen compound metabolic process;cellular process;developmental process;macromolecule biosynthetic process;macromolecule metabolic process;metabolic p…	binding;cation binding;DNA binding;enzyme binding;histone acetyltransferase binding;ion binding;metal ion binding;nucleic acid binding;protein binding;transition metal ion binding;zinc ion binding	cell part;intracellular membrane-bounded organelle;intracellular organelle;intracellular part;membrane-bounded organelle;nucleus;organelle			BTB	3D-structure;Completeproteome;Developmentalprotein;Differentiation;DNA-binding;Metal-binding;Nucleus;Phosphoprotein;Referenceproteome;Repeat;Repressor;Transcription;Transcriptionregulation;Zinc;Zinc-finger
3455	17	17	11.9	251.11	0	33.349	1239700000	59	Q5VUA4;Q5VUA4-2	Q5VUA4;Q5VUA4-2	Zinc finger protein 318	ENSG00000171467	ZNF318	-1.33272	+	0.00883951	2.70313	-0.790785	28.0797	27.582	27.5959	26.5423	26.2516	26.4656	biological regulation;biosynthetic process;cell cycle phase;cell cycle process;cellular biosynthetic process;cellular macromolecule biosynthetic process;cellular macromolecule metabolic process;cellular metabolic process;cellular nitrogen compound metabolic process;cellular process;macromolecule biosynthetic process;macromolecule metabolic process;meiosis;metabolic process;nitrogen compound metab…	binding;cation binding;ion binding;metal ion binding;nucleic acid binding;transition metal ion binding;zinc ion binding	cell part;cytoplasm;intracellular membrane-bounded organelle;intracellular organelle;intracellular part;membrane-bounded organelle;nucleus;organelle				Alternativesplicing;Coiledcoil;Completeproteome;Meiosis;Metal-binding;Nucleus;Phosphoprotein;Polymorphism;Referenceproteome;Repeat;Repressor;Transcription;Transcriptionregulation;Zinc;Zinc-finger
1898	9	9	25.8	65.414	0	15.543	723110000	42	P49116;P49116-2	P49116;P49116-2	Nuclear receptor subfamily 2 group C member 2	ENSG00000177463	NR2C2	-1.33248	+	0.00992556	2.15338	-0.756354	26.7112	27.607	27.0802	25.766	25.7739	25.8611	anatomical structure development;biological regulation;biosynthetic process;cell cycle;cell differentiation;cellular biosynthetic process;cellular developmental process;cellular macromolecule metabolic process;cellular metabolic process;cellular nitrogen compound metabolic process;cellular process;cerebellum development;developmental process;gamete generation;macromolecule metabolic process;male …	binding;cation binding;DNA binding;ion binding;ligand-dependent nuclear receptor activity;metal ion binding;molecular transducer activity;nucleic acid binding;nucleic acid binding transcription factor activity;protein binding;protein binding transcription factor activity;protein dimerization activity;protein heterodimerization activity;receptor activity;sequence-specific DNA binding;sequence-spec…	cell part;intracellular organelle part;intracellular part;nuclear part;nucleoplasm;organelle part			Hormone_recep;zf-C4	3D-structure;Activator;Alternativesplicing;Completeproteome;Differentiation;DNA-binding;Metal-binding;Nucleus;Phosphoprotein;Receptor;Referenceproteome;Repressor;Spermatogenesis;Transcription;Transcriptionregulation;Zinc;Zinc-finger
1378	11	11	52.6	27.391	0	73.697	8960500000	273	P19404	P19404	NADH dehydrogenase [ubiquinone] flavoprotein 2, mitochondrial	ENSG00000178127	NDUFV2	-1.33224	+	0.00688923	3.92105	-0.838016	31.033	30.8692	30.811	29.6269	29.4517	29.6379	anatomical structure development;cardiac muscle tissue development;cellular metabolic process;cellular process;developmental process;electron transport chain;generation of precursor metabolites and energy;metabolic process;mitochondrial electron transport, NADH to ubiquinone;muscle tissue development;nervous system development;oxidation-reduction process;respiratory electron transport chain;small…	2 iron, 2 sulfur cluster binding;binding;catalytic activity;cation binding;electron carrier activity;ion binding;iron-sulfur cluster binding;metal cluster binding;metal ion binding;NADH dehydrogenase (quinone) activity;NADH dehydrogenase (ubiquinone) activity;NADH dehydrogenase activity;oxidoreductase activity;oxidoreductase activity, acting on NADH or NADPH;oxidoreductase activity, acting on NAD…	cell part;cytoplasmic part;intracellular organelle part;intracellular part;macromolecular complex;membrane part;mitochondrial membrane part;mitochondrial part;mitochondrial respiratory chain complex I;NADH dehydrogenase complex;organelle part;protein complex;respiratory chain complex I	Alzheimer's disease;Huntington's disease;Oxidative phosphorylation;Parkinson's disease	Respiratory chain complex I (holoenzyme), mitochondrial;Respiratory chain complex I (incomplete intermediate), mitochondrial;Respiratory chain complex I (intermediate II/230kD), mitochondrial;Respiratory chain complex I (intermediate VII/650kD), mitochondrial;Respiratory chain complex I (lambda subunit) mitochondrial	Complex1_24kDa	2Fe-2S;Completeproteome;Electrontransport;Iron;Iron-sulfur;Membrane;Metal-binding;Mitochondrion;Mitochondrioninnermembrane;NAD;Oxidoreductase;Phosphoprotein;Polymorphism;Referenceproteome;Respiratorychain;Transitpeptide;Transport;Ubiquinone
4335	3	3	17.3	25.431	0	3.9944	514110000	22	Q8TAA5	Q8TAA5	GrpE protein homolog 2, mitochondrial	ENSG00000164284	GRPEL2	-1.33081	+	0.00880556	2.79681	-0.794624	27.2609	26.7106	26.933	25.7364	25.6752	25.5004	cellular macromolecule metabolic process;cellular metabolic process;cellular process;cellular protein metabolic process;establishment of localization;establishment of localization in cell;establishment of protein localization;establishment of protein localization in mitochondrion;establishment of protein localization to organelle;intracellular protein transport;intracellular transport;macromolecu…	adenyl nucleotide binding;adenyl-nucleotide exchange factor activity;ATPase regulator activity;binding;enzyme regulator activity;nucleoside-triphosphatase regulator activity;nucleotide binding;purine nucleotide binding	cell part;cytoplasmic part;intracellular membrane-bounded organelle;intracellular organelle;intracellular organelle lumen;intracellular organelle part;intracellular part;membrane;membrane-bounded organelle;membrane-enclosed lumen;mitochondrial inner membrane;mitochondrial matrix;mitochondrial membrane;mitochondrial part;mitochondrion;organelle;organelle inner membrane;organelle lumen;organelle me…			GrpE	Acetylation;Chaperone;Completeproteome;Mitochondrion;Referenceproteome;Transitpeptide
6048	9	9	29.8	38.681	0	74.494	3969100000	141	Q9NX62	Q9NX62	Inositol monophosphatase 3	ENSG00000104331	IMPAD1	-1.328	+	0.00779487	3.14247	-0.808963	29.3413	29.477	29.6552	27.9709	28.1719	28.3468	alcohol biosynthetic process;alcohol metabolic process;amine metabolic process;aminoglycan metabolic process;anatomical structure development;anatomical structure morphogenesis;biosynthetic process;carbohydrate biosynthetic process;carbohydrate metabolic process;cell development;cellular biosynthetic process;cellular carbohydrate biosynthetic process;cellular carbohydrate metabolic process;cellul…	3'(2'),5'-bisphosphate nucleotidase activity;3'-nucleotidase activity;binding;catalytic activity;cation binding;hydrolase activity;hydrolase activity, acting on ester bonds;inositol monophosphate phosphatase activity;inositol or phosphatidylinositol phosphatase activity;inositol phosphate phosphatase activity;ion binding;metal ion binding;nucleotidase activity;phosphatase activity;phosphoric este…	cell part;cytoplasmic part;Golgi apparatus;integral to membrane;intracellular membrane-bounded organelle;intracellular organelle;intracellular part;intrinsic to membrane;membrane part;membrane-bounded organelle;organelle			Inositol_P	Completeproteome;Diseasemutation;Glycoprotein;Golgiapparatus;Hydrolase;Magnesium;Membrane;Metal-binding;Referenceproteome;Signal-anchor;Transmembrane;Transmembranehelix
1595	9	8	57	22.04	0	251.95	16598000000	313	P30405;P30405-2	P30405;P30405-2	Peptidyl-prolyl cis-trans isomerase F, mitochondrial	ENSG00000108179	PPIF	-1.32676	+	0.00803376	3.02819	-0.803365	31.5228	31.5476	31.3838	30.4041	29.9098	30.1599	apoptotic mitochondrial changes;biological regulation;cellular component organization;cellular component organization at cellular level;cellular component organization or biogenesis;cellular component organization or biogenesis at cellular level;cellular macromolecule metabolic process;cellular membrane organization;cellular metabolic process;cellular process;cellular protein metabolic process;ce…	binding;catalytic activity;cis-trans isomerase activity;cyclosporin A binding;drug binding;isomerase activity;peptide binding;peptidyl-prolyl cis-trans isomerase activity	cell part;cytoplasmic part;intracellular organelle lumen;intracellular organelle part;intracellular part;membrane;membrane-enclosed lumen;mitochondrial inner membrane;mitochondrial matrix;mitochondrial membrane;mitochondrial part;organelle inner membrane;organelle lumen;organelle membrane;organelle part	Toxoplasmosis		Pro_isomerase	3D-structure;Acetylation;Apoptosis;Completeproteome;Cyclosporin;Isomerase;Mitochondrion;Necrosis;Referenceproteome;Rotamase;S-nitrosylation;Transitpeptide
2199	2	2	36.8	7.7412	0	24.959	2807900000	58	P60059	P60059	Protein transport protein Sec61 subunit gamma	ENSG00000132432	SEC61G	-1.32498	+	0.00716224	3.71725	-0.827815	29.3726	29.1288	29.2506	27.7898	28.034	27.9533	antigen processing and presentation;antigen processing and presentation of exogenous antigen;antigen processing and presentation of exogenous peptide antigen;antigen processing and presentation of exogenous peptide antigen via MHC class I;antigen processing and presentation of exogenous peptide antigen via MHC class I, TAP-dependent;antigen processing and presentation of peptide antigen;antigen p…	active transmembrane transporter activity;macromolecule transmembrane transporter activity;P-P-bond-hydrolysis-driven protein transmembrane transporter activity;P-P-bond-hydrolysis-driven transmembrane transporter activity;primary active transmembrane transporter activity;protein transmembrane transporter activity;protein transporter activity;substrate-specific transmembrane transporter activity;…	cell part;cytoplasmic part;endoplasmic reticulum membrane;endoplasmic reticulum part;integral to membrane;intracellular organelle part;intracellular part;intrinsic to membrane;membrane;membrane part;organelle membrane;organelle part	Phagosome;Protein export;Protein processing in endoplasmic reticulum;Vibrio cholerae infection		SecE	Completeproteome;Endoplasmicreticulum;Membrane;Proteintransport;Referenceproteome;Translocation;Transmembrane;Transmembranehelix;Transport
4065	20	20	36.7	83.069	0	59.093	1535400000	103	Q8IYQ7	Q8IYQ7	Threonine synthase-like 1	ENSG00000185875	THNSL1	-1.32439	+	0.00693134	3.85263	-0.831452	27.952	27.8337	27.8677	26.4206	26.5427	26.7169						PALP;SKI	Acetylation;Completeproteome;Polymorphism;Pyridoxalphosphate;Referenceproteome
3398	7	7	10.9	81.176	0	12.082	555040000	39	Q5T3F8-3;Q5T3F8;Q5T3F8-2	Q5T3F8-3;Q5T3F8;Q5T3F8-2	CSC1-like protein 2	ENSG00000137216	TMEM63B	-1.32386		0.0116674	1.57091	-0.725117	26.299	25.7806	26.2541	24.458	25.1168	NaN		binding;nucleotide binding	cell part;integral to membrane;intrinsic to membrane;membrane part			DUF221	Alternativesplicing;Completeproteome;Glycoprotein;Membrane;Phosphoprotein;Polymorphism;Referenceproteome;Transmembrane;Transmembranehelix
2290	3	3	35	9.1275	0	3.3851	1131400000	22	P62312	P62312	U6 snRNA-associated Sm-like protein LSm6	ENSG00000164167	LSM6	-1.32381		0.0104206	1.94571	-0.73621	27.307	27.5005	27.0955	25.4531	26.0994	26.3792	catabolic process;cellular catabolic process;cellular macromolecule catabolic process;cellular macromolecule metabolic process;cellular metabolic process;cellular nitrogen compound metabolic process;cellular process;exonucleolytic nuclear-transcribed mRNA catabolic process involved in deadenylation-dependent decay;macromolecule catabolic process;macromolecule metabolic process;metabolic process;m…	binding;nucleic acid binding;RNA binding	cell part;cytoplasmic part;cytosol;intracellular organelle part;intracellular part;macromolecular complex;nuclear part;organelle part;ribonucleoprotein complex;small nuclear ribonucleoprotein complex;spliceosomal complex	RNA degradation;Spliceosome	LSm1-7 complex;LSm2-8 complex;Spliceosome	LSM	Acetylation;Completeproteome;Cytoplasm;Directproteinsequencing;mRNAprocessing;mRNAsplicing;Nucleus;Referenceproteome;Ribonucleoprotein;RNA-binding;rRNAprocessing;Spliceosome;tRNAprocessing
4680	12	12	44.6	34.93	0	323.31	126160000000	841	Q96AG4	Q96AG4	Leucine-rich repeat-containing protein 59	ENSG00000108829	LRRC59	-1.31821	+	0.00897681	2.80036	-0.788055	34.877	34.4962	34.3232	33.2556	33.339	33.1472			cell part;cytoplasmic part;endoplasmic reticulum;endoplasmic reticulum membrane;endoplasmic reticulum part;envelope;integral to membrane;intracellular membrane-bounded organelle;intracellular non-membrane-bounded organelle;intracellular organelle;intracellular organelle part;intracellular part;intrinsic to membrane;membrane;membrane part;membrane-bounded organelle;mitochondrial nucleoid;mitochond…			LRR_1	Coiledcoil;Completeproteome;Directproteinsequencing;Endoplasmicreticulum;Leucine-richrepeat;Membrane;Microsome;Nucleus;Phosphoprotein;Referenceproteome;Repeat;Signal-anchor;Transmembrane;Transmembranehelix
3004	19	19	58.6	47.837	0	323.31	112780000000	1129	Q15084-3;Q15084;Q15084-4;Q15084-5;Q15084-2	Q15084-3;Q15084;Q15084-4;Q15084-5;Q15084-2	Protein disulfide-isomerase A6	ENSG00000143870	PDIA6	-1.31611	+	0.00702572	4.26285	-0.836876	33.84	33.8413	33.9742	32.6575	32.5883	32.4614	activation of signaling protein activity involved in unfolded protein response;biological regulation;cell redox homeostasis;cellular homeostasis;cellular process;glycerol ether metabolic process;homeostatic process;metabolic process;organic ether metabolic process;positive regulation of catalytic activity;positive regulation of hydrolase activity;positive regulation of kinase activity;positive re…	catalytic activity;disulfide oxidoreductase activity;electron carrier activity;intramolecular oxidoreductase activity;intramolecular oxidoreductase activity, interconverting keto- and enol-groups;intramolecular oxidoreductase activity, transposing S-S bonds;isomerase activity;oxidoreductase activity;oxidoreductase activity, acting on a sulfur group of donors;protein disulfide isomerase activity;p…	cell part;cytoplasmic membrane-bounded vesicle;cytoplasmic part;cytoplasmic vesicle;endoplasmic reticulum lumen;endoplasmic reticulum membrane;endoplasmic reticulum part;endoplasmic reticulum-Golgi intermediate compartment;intracellular membrane-bounded organelle;intracellular organelle;intracellular organelle lumen;intracellular organelle part;intracellular part;melanosome;membrane;membrane part…	Protein processing in endoplasmic reticulum		Thioredoxin	3D-structure;Alternativesplicing;Cellmembrane;Chaperone;Completeproteome;Directproteinsequencing;Disulfidebond;Endoplasmicreticulum;Isomerase;Membrane;Phosphoprotein;Polymorphism;Redox-activecenter;Referenceproteome;Repeat;Signal
6167	14	14	19.1	107.49	0	26.438	1262200000	70	Q9P0V3;Q9P0V3-2	Q9P0V3;Q9P0V3-2	SH3 domain-binding protein 4	ENSG00000130147	SH3BP4	-1.31095		0.010509	2.08633	-0.741076	27.5609	27.1285	28.0192	26.1667	26.1937	26.4154	biological regulation;cellular component organization;cellular component organization or biogenesis;cellular membrane organization;cellular process;cellular response to acid;cellular response to amine stimulus;cellular response to amino acid stimulus;cellular response to chemical stimulus;cellular response to endogenous stimulus;cellular response to organic nitrogen;cellular response to organic s…	enzyme regulator activity;GDP-dissociation inhibitor activity;GTPase regulator activity;nucleoside-triphosphatase regulator activity;small GTPase regulator activity	cell part;clathrin-coated vesicle;coated pit;coated vesicle;cytoplasm;cytoplasmic membrane-bounded vesicle;cytoplasmic part;cytoplasmic vesicle;intracellular membrane-bounded organelle;intracellular organelle;intracellular part;membrane part;membrane-bounded organelle;membrane-bounded vesicle;nucleus;organelle;vesicle			SH3_1;SH3_2;ZU5	Alternativesplicing;Coatedpit;Completeproteome;Cytoplasmicvesicle;Endocytosis;Membrane;Nucleus;Phosphoprotein;Polymorphism;Referenceproteome;SH3domain
1198	2	2	43.1	12.155	0	35.198	4977200000	153	P12074	P12074	Cytochrome c oxidase subunit 6A1, mitochondrial	ENSG00000111775	COX6A1	-1.30883	+	0.00967368	2.6554	-0.775645	29.3857	29.0613	28.8	27.6141	27.8684	27.838	cellular metabolic process;cellular process;electron transport chain;generation of precursor metabolites and energy;metabolic process;oxidation-reduction process;respiratory electron transport chain;small molecule metabolic process	catalytic activity;cation transmembrane transporter activity;cytochrome-c oxidase activity;heme-copper terminal oxidase activity;hydrogen ion transmembrane transporter activity;inorganic cation transmembrane transporter activity;ion transmembrane transporter activity;monovalent inorganic cation transmembrane transporter activity;oxidoreductase activity;oxidoreductase activity, acting on a heme gr…	cell part;cytoplasmic part;intracellular organelle part;intracellular part;macromolecular complex;membrane;membrane part;mitochondrial inner membrane;mitochondrial membrane;mitochondrial membrane part;mitochondrial part;mitochondrial respiratory chain complex IV;organelle inner membrane;organelle membrane;organelle part;protein complex;respiratory chain complex IV	Alzheimer's disease;Cardiac muscle contraction;Huntington's disease;Oxidative phosphorylation;Parkinson's disease		COX6A	Completeproteome;Directproteinsequencing;Membrane;Mitochondrion;Mitochondrioninnermembrane;Referenceproteome;Transitpeptide
2531	14	13	28.3	75.663	0	95.881	3085200000	144	Q03519;Q03519-2	Q03519;Q03519-2	Antigen peptide transporter 2	ENSG00000204267;ENSG00000206235;ENSG00000206299;ENSG00000223481;ENSG00000225967;ENSG00000228582;ENSG00000232326;ENSG00000237599	TAP2	-1.30833	+	0.00981818	2.56052	-0.770226	29.088	28.6355	29.2412	27.6247	27.8374	27.5775	antigen processing and presentation;antigen processing and presentation of endogenous antigen;antigen processing and presentation of endogenous peptide antigen;antigen processing and presentation of endogenous peptide antigen via MHC class I;antigen processing and presentation of endogenous peptide antigen via MHC class I via ER pathway;antigen processing and presentation of endogenous peptide an…	active transmembrane transporter activity;adenyl nucleotide binding;adenyl ribonucleotide binding;antigen binding;ATP binding;ATPase activity;ATPase activity, coupled;ATPase activity, coupled to movement of substances;ATPase activity, coupled to transmembrane movement of substances;binding;catalytic activity;hydrolase activity;hydrolase activity, acting on acid anhydrides;hydrolase activity, acti…	cell part;cytoplasmic part;endoplasmic reticulum part;intracellular membrane-bounded organelle;intracellular organelle;intracellular organelle part;intracellular part;macromolecular complex;membrane;membrane part;membrane-bounded organelle;nucleus;organelle;organelle part;plasma membrane;protein complex;TAP complex	ABC transporters;Antigen processing and presentation;Phagosome;Primary immunodeficiency		ABC_membrane;ABC_tran	Adaptiveimmunity;Alternativesplicing;ATP-binding;Completeproteome;Endoplasmicreticulum;Host-virusinteraction;Immunity;Membrane;Nucleotide-binding;Peptidetransport;Polymorphism;Proteintransport;Referenceproteome;Transmembrane;Transmembranehelix;Transport
1619	5	5	34.6	16.545	0	12.407	485160000	22	P31431-2;P31431	P31431-2;P31431	Syndecan-4	ENSG00000124145	SDC4	-1.30775		0.0152932	1.31	-0.685592	26.4343	26.4649	26.5305	NaN	24.6243	25.7133	amine metabolic process;aminoglycan biosynthetic process;aminoglycan catabolic process;aminoglycan metabolic process;anatomical structure development;biological regulation;biosynthetic process;carbohydrate biosynthetic process;carbohydrate catabolic process;carbohydrate metabolic process;catabolic process;cellular lipid metabolic process;cellular metabolic process;cellular process;cellular respon…	molecular transducer activity;receptor activity;signal transducer activity;signaling receptor activity;thrombospondin receptor activity	adherens junction;anchoring junction;cell junction;cell part;cell surface;cell-substrate adherens junction;cell-substrate junction;contractile fiber part;costamere;cytoplasmic part;extracellular region;focal adhesion;Golgi apparatus part;Golgi lumen;integral to membrane;integral to plasma membrane;intracellular organelle lumen;intracellular organelle part;intracellular part;intrinsic to membrane;…	Cell adhesion molecules (CAMs);ECM-receptor interaction;Malaria		Syndecan	3D-structure;Alternativesplicing;Completeproteome;Glycoprotein;Heparansulfate;Membrane;Polymorphism;Proteoglycan;Referenceproteome;Secreted;Signal;Transmembrane;Transmembranehelix
380	3	3	20	20.108	0	9.2626	1331400000	21	O43181	O43181	NADH dehydrogenase [ubiquinone] iron-sulfur protein 4, mitochondrial	ENSG00000164258	NDUFS4	-1.30748		0.0100463	2.23786	-0.776166	28.5779	28.2215	28.6924	27.1581	NaN	27.2215	anatomical structure development;biological regulation;brain development;cAMP-mediated signaling;cellular component assembly;cellular component assembly at cellular level;cellular component biogenesis;cellular component organization;cellular component organization at cellular level;cellular component organization or biogenesis;cellular component organization or biogenesis at cellular level;cellul…	catalytic activity;NADH dehydrogenase (quinone) activity;NADH dehydrogenase (ubiquinone) activity;NADH dehydrogenase activity;oxidoreductase activity;oxidoreductase activity, acting on NADH or NADPH;oxidoreductase activity, acting on NADH or NADPH, quinone or similar compound as acceptor	cell part;cytoplasmic part;intracellular organelle part;intracellular part;macromolecular complex;membrane part;mitochondrial membrane part;mitochondrial part;mitochondrial respiratory chain complex I;NADH dehydrogenase complex;organelle part;protein complex;respiratory chain complex I	Alzheimer's disease;Huntington's disease;Oxidative phosphorylation;Parkinson's disease	Respiratory chain complex I (holoenzyme), mitochondrial;Respiratory chain complex I (incomplete intermediate), mitochondrial;Respiratory chain complex I (intermediate II/230kD), mitochondrial;Respiratory chain complex I (intermediate VII/650kD), mitochondrial;Respiratory chain complex I (lambda subunit) mitochondrial	ETC_C1_NDUFA4	Completeproteome;Electrontransport;Membrane;Mitochondrion;Mitochondrioninnermembrane;Polymorphism;Referenceproteome;Respiratorychain;Transitpeptide;Transport
5641	18	18	47	71.085	0	153.34	4784700000	210	Q9H6W3;Q9H6W3-2	Q9H6W3;Q9H6W3-2	Bifunctional lysine-specific demethylase and histidyl-hydroxylase NO66		NO66	-1.30628	+	0.00699398	4.47019	-0.835257	29.5008	29.5769	29.6806	28.3415	28.2135	28.2844	biological regulation;biosynthetic process;cellular biosynthetic process;cellular macromolecule biosynthetic process;cellular macromolecule metabolic process;cellular metabolic process;cellular nitrogen compound metabolic process;cellular process;macromolecule biosynthetic process;macromolecule metabolic process;metabolic process;negative regulation of biological process;negative regulation of bi…	binding;catalytic activity;cation binding;demethylase activity;dioxygenase activity;histone demethylase activity;histone demethylase activity (H3-K36 specific);histone demethylase activity (H3-K4 specific);ion binding;iron ion binding;metal ion binding;oxidoreductase activity;oxidoreductase activity, acting on paired donors, with incorporation or reduction of molecular oxygen;oxidoreductase activ…	cell part;intracellular membrane-bounded organelle;intracellular non-membrane-bounded organelle;intracellular organelle;intracellular organelle part;intracellular part;membrane-bounded organelle;non-membrane-bounded organelle;nuclear part;nucleolus;nucleoplasm;nucleus;organelle;organelle part			Cupin_4	3D-structure;Alternativesplicing;Chromatinregulator;Completeproteome;Dioxygenase;Iron;Metal-binding;Nucleus;Oxidoreductase;Phosphoprotein;Polymorphism;Referenceproteome;Repressor;Transcription;Transcriptionregulation
4005	8	8	11.3	125.3	0	9.9862	754720000	25	Q8IWB9;Q8IWB9-2	Q8IWB9;Q8IWB9-2	Testis-expressed sequence 2 protein	ENSG00000136478;ENSG00000263185	TEX2	-1.30475	+	0.00880328	2.99414	-0.789769	26.6428	26.8634	26.9981	25.4895	25.3606	25.7399	biological regulation;cellular lipid metabolic process;cellular metabolic process;cellular process;cellular response to stimulus;lipid metabolic process;membrane lipid metabolic process;metabolic process;primary metabolic process;regulation of biological process;regulation of cellular process;response to stimulus;signal transduction;sphingolipid metabolic process	binding;lipid binding;phospholipid binding	cell part;integral to membrane;intrinsic to membrane;membrane part			DUF2404	Alternativesplicing;Completeproteome;Glycoprotein;Membrane;Phosphoprotein;Polymorphism;Referenceproteome;Transmembrane;Transmembranehelix
5726	12	12	55.8	24.279	0	85.642	11838000000	200	Q9HAV7	Q9HAV7	GrpE protein homolog 1, mitochondrial	ENSG00000109519	GRPEL1	-1.3043	+	0.00709942	4.10439	-0.826053	30.9737	31.0013	30.9986	29.6942	29.5475	29.819	cellular macromolecule metabolic process;cellular metabolic process;cellular process;cellular protein metabolic process;establishment of localization;establishment of localization in cell;establishment of protein localization;establishment of protein localization in mitochondrion;establishment of protein localization to organelle;intracellular protein transmembrane transport;intracellular protein…	adenyl nucleotide binding;adenyl-nucleotide exchange factor activity;ATPase regulator activity;binding;enzyme regulator activity;nucleoside-triphosphatase regulator activity;nucleotide binding;protein binding;purine nucleotide binding;unfolded protein binding	cell part;cytoplasmic part;intracellular organelle lumen;intracellular organelle part;intracellular part;membrane-enclosed lumen;mitochondrial matrix;mitochondrial part;organelle lumen;organelle part			GrpE	Acetylation;Chaperone;Completeproteome;Mitochondrion;Referenceproteome;Transitpeptide
5521	2	1	8.8	27.984	0	3.6342	75957000	7	Q9H160-2;Q9H160	Q9H160-2;Q9H160	Inhibitor of growth protein 2	ENSG00000168556	ING2	-1.30342		0.0153138	1.22071	-0.671087	24.0658	23.733	24.8746	22.8352	NaN	23.0069	anatomical structure development;asymmetric cell division;biological regulation;biosynthetic process;cell cycle phase;cell cycle process;cell development;cell division;cell motility;cellular biosynthetic process;cellular component movement;cellular component organization;cellular component organization at cellular level;cellular component organization or biogenesis;cellular component organization…	binding;cation binding;chromatin binding;DNA binding;histone binding;ion binding;lipid binding;metal ion binding;methylated histone residue binding;nucleic acid binding;phosphatidylinositol binding;phospholipid binding;protein binding;protein complex binding;transition metal ion binding;zinc ion binding	CCAAT-binding factor complex;cell part;chromatin remodeling complex;chromosomal part;histone deacetylase complex;intracellular organelle part;intracellular part;macromolecular complex;nuclear chromosome part;nuclear part;nucleoplasm part;organelle part;protein complex;Sin3 complex;Sin3-type complex;transcription factor complex		ING2 complex	ING;PHD	Chromatinregulator;Coiledcoil;Completeproteome;Directproteinsequencing;Growthregulation;Metal-binding;Nucleus;Referenceproteome;Transcription;Transcriptionregulation;Zinc;Zinc-finger
3783	21	21	40.7	86.573	0	165.01	3775000000	126	Q7L8L6	Q7L8L6	FAST kinase domain-containing protein 5	ENSG00000215251	FASTKD5	-1.30317	+	0.00827374	3.28446	-0.800622	29.4441	29.3746	29.171	28.2221	27.9168	27.9412	cellular macromolecule metabolic process;cellular metabolic process;cellular process;cellular protein metabolic process;cellular respiration;energy derivation by oxidation of organic compounds;generation of precursor metabolites and energy;macromolecule metabolic process;macromolecule modification;metabolic process;oxidation-reduction process;phosphate-containing compound metabolic process;phosph…	catalytic activity;kinase activity;phosphotransferase activity, alcohol group as acceptor;protein kinase activity;transferase activity;transferase activity, transferring phosphorus-containing groups	cell part;cytoplasmic part;intracellular membrane-bounded organelle;intracellular organelle;intracellular part;membrane-bounded organelle;mitochondrion;organelle			FAST_1;FAST_2;RAP	Acetylation;Completeproteome;Phosphoprotein;Polymorphism;Referenceproteome
1212	10	4	22.2	59.834	0	38.034	439670000	33	P12931;P12931-2	P12931;P12931-2	Proto-oncogene tyrosine-protein kinase Src	ENSG00000197122	SRC	-1.29844		0.0103361	2.12433	-0.737797	25.5308	26.0898	26.3833	24.6286	24.8446	24.6354	anatomical structure development;anatomical structure homeostasis;anatomical structure morphogenesis;axon guidance;biological adhesion;biological regulation;bone resorption;branching involved in mammary gland duct morphogenesis;branching morphogenesis of a tube;cell activation;cell adhesion;cell cycle;cell migration;cell motility;cell surface receptor linked signaling pathway;cellular component a…	adenyl nucleotide binding;adenyl ribonucleotide binding;ATP binding;binding;binding, bridging;catalytic activity;cation binding;heme binding;integrin binding;ion binding;iron ion binding;kinase activity;metal ion binding;non-membrane spanning protein tyrosine kinase activity;nucleotide binding;phosphotransferase activity, alcohol group as acceptor;protein binding;protein binding, bridging;protein…	caveola;cell part;cytoplasmic part;cytoskeleton;cytosol;endosome;intracellular membrane-bounded organelle;intracellular non-membrane-bounded organelle;intracellular organelle;intracellular organelle part;intracellular part;late endosome;lysosome;lytic vacuole;membrane;membrane part;membrane raft;membrane-bounded organelle;mitochondrial inner membrane;mitochondrial membrane;mitochondrial part;non-…	Adherens junction;Bacterial invasion of epithelial cells;Endocytosis;Epithelial cell signaling in Helicobacter pylori infection;ErbB signaling pathway;Focal adhesion;Gap junction;GnRH signaling pathway;ko05152;Tight junction;VEGF signaling pathway	CAMK2-delta-MASH1 promoter-coactivator complex;CAS-SRC-FAK complex;CNK1-SRC-RAF1 complex;ITGA2b-ITGB3-CD47-SRC complex;MASH1 promoter-coactivator complex;p130Cas-ER-alpha-cSrc-kinase- PI3-kinase p85-subunit complex;Polycystin-1 multiprotein complex (ACTN1, CDH1, SRC, JUP, VCL, CTNNB1, PXN, BCAR1, PKD1, PTK2, TLN1);SH3P2/OSTF1-CBL-SRC complex;SRC-PRKCD-CDCP1 complex;TNFRSF11A-TRAF6-SRC complex	Pkinase_Tyr;SH2;SH3_1	3D-structure;Alternativesplicing;ATP-binding;Celladhesion;Cellcycle;Cellmembrane;Completeproteome;Cytoplasm;Cytoskeleton;Host-virusinteraction;Immunity;Kinase;Lipoprotein;Membrane;Mitochondrion;Mitochondrioninnermembrane;Myristate;Nucleotide-binding;Nucleus;Phosphoprotein;Polymorphism;Proto-oncogene;Referenceproteome;SH2domain;SH3domain;S-nitrosylation;Transferase;Tyrosine-proteinkinase;Ublconjug…
917	2	2	7.6	57.041	0	50.403	4240100000	53	P00395	P00395	Cytochrome c oxidase subunit 1	ENSG00000198804	MT-CO1	-1.296	+	0.00902024	3.02313	-0.7862	29.6259	29.7033	29.8451	28.4621	28.6421	28.1821	aerobic respiration;cellular metabolic process;cellular process;cellular respiration;electron transport chain;energy derivation by oxidation of organic compounds;generation of precursor metabolites and energy;metabolic process;mitochondrial electron transport, cytochrome c to oxygen;oxidation-reduction process;respiratory electron transport chain;small molecule metabolic process	binding;catalytic activity;cation binding;cation transmembrane transporter activity;cytochrome-c oxidase activity;electron carrier activity;heme binding;heme-copper terminal oxidase activity;hydrogen ion transmembrane transporter activity;inorganic cation transmembrane transporter activity;ion binding;ion transmembrane transporter activity;iron ion binding;metal ion binding;monovalent inorganic c…	cell part;cytoplasmic part;integral to membrane;intracellular organelle part;intracellular part;intrinsic to membrane;membrane;membrane part;mitochondrial inner membrane;mitochondrial membrane;mitochondrial part;organelle inner membrane;organelle membrane;organelle part;respiratory chain	Alzheimer's disease;Cardiac muscle contraction;Huntington's disease;Oxidative phosphorylation;Parkinson's disease		COX1	Completeproteome;Copper;Deafness;Diseasemutation;Electrontransport;Heme;Iron;Leberhereditaryopticneuropathy;Membrane;Metal-binding;Mitochondrion;Mitochondrioninnermembrane;Non-syndromicdeafness;Oxidoreductase;Polymorphism;Referenceproteome;Respiratorychain;Transmembrane;Transmembranehelix;Transport
5388	11	11	33.5	36.908	0	46.862	4240800000	130	Q9BYD6	Q9BYD6	39S ribosomal protein L1, mitochondrial	ENSG00000169288	MRPL1	-1.29564	+	0.00896458	3.0623	-0.787645	29.7526	29.9862	29.8396	28.3795	28.5023	28.8096	biosynthetic process;cellular biosynthetic process;cellular macromolecule biosynthetic process;cellular macromolecule metabolic process;cellular metabolic process;cellular process;cellular protein metabolic process;macromolecule biosynthetic process;macromolecule metabolic process;metabolic process;primary metabolic process;protein metabolic process;translation	binding;nucleic acid binding;RNA binding;structural constituent of ribosome;structural molecule activity	cell part;cytoplasmic part;intracellular membrane-bounded organelle;intracellular organelle;intracellular organelle part;intracellular part;large ribosomal subunit;macromolecular complex;membrane-bounded organelle;mitochondrion;organelle;organelle part;ribonucleoprotein complex		39S ribosomal subunit, mitochondrial;55S ribosome, mitochondrial	MRL1	Completeproteome;Mitochondrion;Polymorphism;Referenceproteome;Ribonucleoprotein;Ribosomalprotein;Transitpeptide
1857	44	42	18.1	394.46	0	70.029	2651900000	129	P46939;P46939-2;P46939-4;P46939-3;Q13474-2;Q13474	P46939;P46939-2	Utrophin	ENSG00000152818	UTRN	-1.29528		0.01376	1.46081	-0.677599	27.9964	27.6761	29.0134	27.0173	27.0153	26.7675	anatomical structure development;biological regulation;developmental process;multicellular organismal process;muscle contraction;muscle organ development;muscle structure development;muscle system process;organ development;positive regulation of biological process;positive regulation of cell adhesion;positive regulation of cell-matrix adhesion;positive regulation of cell-substrate adhesion;positi…	actin binding;binding;calcium ion binding;cation binding;cytoskeletal protein binding;ion binding;metal ion binding;protein binding;transition metal ion binding;zinc ion binding	cell junction;cell part;cell projection;cytoplasm;cytoskeleton;dystrophin-associated glycoprotein complex;filopodium;intracellular membrane-bounded organelle;intracellular non-membrane-bounded organelle;intracellular organelle;intracellular part;macromolecular complex;membrane;membrane part;membrane-bounded organelle;neuromuscular junction;non-membrane-bounded organelle;nucleus;organelle;plasma m…		UTM-SGCE-DAG1-CAV1-NOS3 complex	CH;efhand_1;efhand_2;Spectrin;WW;ZZ	3D-structure;Actin-binding;Calcium;Celljunction;Cellmembrane;Completeproteome;Cytoplasm;Cytoskeleton;Membrane;Metal-binding;Phosphoprotein;Polymorphism;Postsynapticcellmembrane;Referenceproteome;Repeat;Synapse;Zinc;Zinc-finger
6613	8	8	37	32.267	0	33.611	1819900000	73	Q9Y394-2;Q9Y394	Q9Y394-2;Q9Y394	Dehydrogenase/reductase SDR family member 7	ENSG00000100612	DHRS7	-1.28823	+	0.00981773	2.51629	-0.757327	28.2738	28.1381	28.5767	26.8796	27.3484	26.8958		catalytic activity;oxidoreductase activity				adh_short	Alternativesplicing;Completeproteome;NAD;Oxidoreductase;Polymorphism;Referenceproteome;Signal
2527	8	3	42.7	36.978	0	82.616	1467600000	68	Q03405;Q03405-3	Q03405;Q03405-3	Urokinase plasminogen activator surface receptor	ENSG00000011422	PLAUR	-1.28729	+	0.00980549	2.5239	-0.757263	28.1182	28.0364	28.0538	26.4663	27.148	26.7322	attachment of GPI anchor to protein;biological regulation;blood coagulation;cellular component movement;cellular macromolecule metabolic process;cellular metabolic process;cellular process;cellular protein metabolic process;chemotaxis;coagulation;C-terminal protein amino acid modification;C-terminal protein lipidation;fibrinolysis;hemostasis;locomotion;macromolecule metabolic process;macromolecul…	molecular transducer activity;receptor activity;signal transducer activity;signaling receptor activity;U-plasminogen activator receptor activity	anchored to membrane;cell part;cell surface;cytoplasmic part;endoplasmic reticulum lumen;endoplasmic reticulum membrane;endoplasmic reticulum part;extracellular region;extrinsic to membrane;integral to membrane;integral to plasma membrane;intracellular organelle lumen;intracellular organelle part;intracellular part;intrinsic to membrane;intrinsic to plasma membrane;membrane;membrane part;membrane…	Complement and coagulation cascades	ITGAV-ITGB5-PLAUR complex	UPAR_LY6	3D-structure;Alternativesplicing;Cellmembrane;Completeproteome;Directproteinsequencing;Disulfidebond;Glycoprotein;GPI-anchor;Lipoprotein;Membrane;Polymorphism;Receptor;Referenceproteome;Repeat;Secreted;Signal
2181	6	6	58.6	15.928	0	83.438	5109100000	161	P57105	P57105	Synaptojanin-2-binding protein	ENSG00000213463	SYNJ2BP	-1.28378	+	0.00933333	3.07154	-0.781446	29.6858	30.147	29.8114	28.5679	28.6733	28.5516	biological regulation;cellular component organization;cellular component organization at cellular level;cellular component organization or biogenesis;cellular component organization or biogenesis at cellular level;cellular localization;cellular process;intracellular distribution of mitochondria;localization;mitochondrion distribution;mitochondrion localization;mitochondrion organization;negative …		cell part;cell surface;cytoplasmic part;integral to membrane;integral to mitochondrial membrane;integral to mitochondrial outer membrane;integral to organelle membrane;intracellular membrane-bounded organelle;intracellular organelle;intracellular organelle part;intracellular part;intrinsic to membrane;intrinsic to mitochondrial outer membrane;intrinsic to organelle membrane;membrane part;membrane…			PDZ	3D-structure;Completeproteome;Membrane;Mitochondrion;Mitochondrionoutermembrane;Polymorphism;Referenceproteome;Transmembrane;Transmembranehelix
3785	9	9	33.7	41.881	0	48.566	2665900000	98	Q7LGA3;Q7LGA3-2;Q7LGA3-3	Q7LGA3;Q7LGA3-2;Q7LGA3-3	Heparan sulfate 2-O-sulfotransferase 1	ENSG00000153936	HS2ST1	-1.28248	+	0.00789281	3.75692	-0.804007	28.9227	28.8199	28.9631	27.7887	27.549	27.5206	amine metabolic process;aminoglycan biosynthetic process;aminoglycan metabolic process;biosynthetic process;carbohydrate biosynthetic process;carbohydrate metabolic process;glycosaminoglycan biosynthetic process;glycosaminoglycan metabolic process;macromolecule biosynthetic process;macromolecule metabolic process;metabolic process;nitrogen compound metabolic process;polysaccharide biosynthetic pr…	catalytic activity;sulfotransferase activity;transferase activity;transferase activity, transferring sulfur-containing groups	cell part;cytoplasmic part;Golgi apparatus part;Golgi membrane;integral to membrane;intracellular organelle part;intracellular part;intrinsic to membrane;membrane;membrane part;organelle membrane;organelle part	Glycosaminoglycan biosynthesis - heparan sulfate		Sulfotransfer_2	Alternativesplicing;Completeproteome;Disulfidebond;Glycoprotein;Golgiapparatus;Membrane;Referenceproteome;Signal-anchor;Transferase;Transmembrane;Transmembranehelix
2607	2	2	2.8	83.956	0	5.2577	109120000	23	Q08AE8-2;Q08AE8;Q08AE8-4;Q08AE8-3;Q08AE8-5	Q08AE8-2;Q08AE8;Q08AE8-4;Q08AE8-3;Q08AE8-5	Protein spire homolog 1	ENSG00000134278	SPIRE1	-1.28191	+	0.00990573	2.7173	-0.789495	24.337	24.1825	24.4869	NaN	23.1198	22.9873	actin cytoskeleton organization;actin filament bundle assembly;actin filament organization;actin filament-based process;cell cycle cytokinesis;cell cycle process;cellular component assembly;cellular component assembly at cellular level;cellular component organization;cellular component organization at cellular level;cellular component organization or biogenesis;cellular component organization or …		cell cortex;cell part;cytoplasmic part;cytoplasmic vesicle membrane;cytoplasmic vesicle part;cytoskeleton;Golgi apparatus;intracellular membrane-bounded organelle;intracellular non-membrane-bounded organelle;intracellular organelle;intracellular organelle part;intracellular part;membrane;membrane-bounded organelle;non-membrane-bounded organelle;organelle;organelle membrane;organelle part;perinucl…	Dorso-ventral axis formation			3D-structure;Actin-binding;Alternativesplicing;Cellmembrane;Coiledcoil;Completeproteome;Cytoplasm;Cytoplasmicvesicle;Cytoskeleton;Membrane;Phosphoprotein;Polymorphism;Proteintransport;Referenceproteome;Repeat;Transport
895	9	9	38.4	36.694	0	15.229	4223700000	56	O95900;O95900-2	O95900;O95900-2	Probable tRNA pseudouridine synthase 2	ENSG00000167112	TRUB2	-1.27674		0.0104342	2.31139	-0.739459	28.9238	29.0104	28.8777	27.7717	27.9795	27.2305	cellular macromolecule metabolic process;cellular metabolic process;cellular nitrogen compound metabolic process;cellular process;macromolecule metabolic process;macromolecule modification;metabolic process;ncRNA metabolic process;ncRNA processing;nitrogen compound metabolic process;nucleic acid metabolic process;nucleobase-containing compound metabolic process;primary metabolic process;pseudouri…	binding;catalytic activity;intramolecular transferase activity;isomerase activity;nucleic acid binding;pseudouridine synthase activity;RNA binding				TruB_N	Completeproteome;Isomerase;Polymorphism;Referenceproteome;tRNAprocessing
3921	5	5	31.8	31.106	0	11.683	460800000	14	Q86WA6-2;Q86WA6	Q86WA6-2;Q86WA6	Valacyclovir hydrolase	ENSG00000137274	BPHL	-1.27408	+	0.00889189	3.36259	-0.786861	26.8805	26.9202	26.8796	25.8439	25.4419	25.5723	amine metabolic process;carboxylic acid metabolic process;cellular amine metabolic process;cellular amino acid metabolic process;cellular ketone metabolic process;cellular metabolic process;cellular nitrogen compound metabolic process;cellular process;metabolic process;nitrogen compound metabolic process;organic acid metabolic process;oxoacid metabolic process;primary metabolic process;response t…	catalytic activity;hydrolase activity	cell part;cytoplasmic part;intracellular membrane-bounded organelle;intracellular organelle;intracellular part;membrane-bounded organelle;mitochondrion;organelle				3D-structure;Acetylation;Alternativesplicing;Completeproteome;Directproteinsequencing;Hydrolase;Referenceproteome;Signal
995	4	4	37	10.659	0	8.6781	346090000	19	P05114	P05114	Non-histone chromosomal protein HMG-14	ENSG00000205581	HMGN1	-1.27015		0.0220807	0.857881	-0.580443	25.3401	27.3714	27.0414	24.7571	25.5805	25.6047	anatomical structure morphogenesis;biological regulation;cellular component organization;cellular component organization at cellular level;cellular component organization or biogenesis;cellular component organization or biogenesis at cellular level;cellular macromolecule metabolic process;cellular metabolic process;cellular nitrogen compound metabolic process;cellular process;cellular response to…	binding;chromatin binding;chromatin DNA binding;DNA binding;nucleic acid binding;nucleosomal DNA binding;nucleosome binding;structure-specific DNA binding	cell part;chromatin;chromosomal part;cytoplasm;intracellular membrane-bounded organelle;intracellular organelle;intracellular organelle part;intracellular part;membrane-bounded organelle;nucleus;organelle;organelle part			HMG14_17	Acetylation;Completeproteome;Cytoplasm;Directproteinsequencing;DNA-binding;Nucleus;Phosphoprotein;Referenceproteome;RNAediting
1802	89	88	69.2	157.9	0	323.31	221250000000	3374	P42704	P42704	Leucine-rich PPR motif-containing protein, mitochondrial	ENSG00000138095	LRPPRC	-1.26898	+	0.00690045	5.87413	-0.83071	35.1654	35.1751	35.1542	33.8884	33.8535	33.9459	biological regulation;biosynthetic process;cellular biosynthetic process;cellular component movement;cellular macromolecule biosynthetic process;cellular macromolecule metabolic process;cellular metabolic process;cellular nitrogen compound metabolic process;cellular process;cytoskeleton-dependent intracellular transport;establishment of localization;establishment of localization in cell;establish…	beta-tubulin binding;binding;cytoskeletal protein binding;DNA binding;microtubule binding;nucleic acid binding;protein binding;RNA binding;single-stranded DNA binding;structure-specific DNA binding;tubulin binding	cell part;chromosome;condensed chromosome;condensed nuclear chromosome;cytoplasmic part;cytoskeletal part;intracellular non-membrane-bounded organelle;intracellular organelle;intracellular organelle part;intracellular part;macromolecular complex;membrane;membrane part;microtubule;mitochondrial nucleoid;mitochondrial part;non-membrane-bounded organelle;nuclear chromosome;nuclear inner membrane;nuc…		TNF-alpha/NF-kappa B signaling complex 5	PPR	Acetylation;Completeproteome;Directproteinsequencing;Diseasemutation;DNA-binding;Leighsyndrome;Membrane;Mitochondrion;mRNAtransport;Nucleus;Polymorphism;Referenceproteome;Repeat;RNA-binding;Transcription;Transcriptionregulation;Transitpeptide;Transport
46	11	11	38.7	42.233	0	34.695	2076500000	113	A8MXV4	A8MXV4	Nucleoside diphosphate-linked moiety X motif 19, mitochondrial	ENSG00000213965	NUDT19	-1.26837	+	0.00934579	3.33826	-0.782763	28.2755	28.2306	28.5383	27.0057	27.0085	27.2252		binding;catalytic activity;cation binding;hydrolase activity;ion binding;metal ion binding	cell part;cytoplasmic part;intracellular membrane-bounded organelle;intracellular organelle;intracellular part;membrane-bounded organelle;microbody;mitochondrion;organelle;peroxisome	Peroxisome		NUDIX	Completeproteome;Hydrolase;Magnesium;Manganese;Metal-binding;Mitochondrion;Peroxisome;Polymorphism;Referenceproteome;Transitpeptide
4589	23	23	17.3	231.6	0	51.719	972210000	67	Q92817;A8MZ36	Q92817	Envoplakin	ENSG00000167880	EVPL	-1.26679		0.0130042	1.65991	-0.685635	26.6089	26.7779	26.4165	24.8879	25.1329	25.9822	cell differentiation;cellular developmental process;cellular macromolecule metabolic process;cellular metabolic process;cellular process;cellular protein metabolic process;developmental process;epidermal cell differentiation;epithelial cell differentiation;keratinization;keratinocyte differentiation;macromolecule metabolic process;macromolecule modification;metabolic process;peptide cross-linking…	binding;binding, bridging;protein binding;protein binding, bridging;structural molecule activity	anchoring junction;cell junction;cell part;cell-cell junction;cornified envelope;cytoplasm;cytoskeleton;desmosome;intracellular non-membrane-bounded organelle;intracellular organelle;intracellular part;non-membrane-bounded organelle;organelle			Plectin	Celljunction;Coiledcoil;Completeproteome;Cytoplasm;Cytoskeleton;Isopeptidebond;Keratinization;Lipoprotein;Phosphoprotein;Polymorphism;Referenceproteome;Repeat;Ublconjugation
4230	7	7	26.7	38.963	0	21.405	944610000	46	Q8NBM4;Q8NBM4-4;Q8NBM4-3;Q8NBM4-2;Q8NBM4-5	Q8NBM4;Q8NBM4-4;Q8NBM4-3;Q8NBM4-2	Ubiquitin-associated domain-containing protein 2	ENSG00000134882	UBAC2	-1.26324		0.0105594	2.52466	-0.744795	27.7421	27.3714	27.2474	26.2116	26.4006	25.959			cell part;integral to membrane;intrinsic to membrane;membrane part			UBA	Alternativesplicing;Completeproteome;Glycoprotein;Membrane;Referenceproteome;Signal;Transmembrane;Transmembranehelix
5505	13	13	36.6	57.46	0	25.844	941180000	34	Q9H0R6;Q9H0R6-2	Q9H0R6;Q9H0R6-2	Glutamyl-tRNA(Gln) amidotransferase subunit A, mitochondrial	ENSG00000130348	QRSL1	-1.26037	+	0.0098423	2.84172	-0.758773	27.7593	27.6302	27.9867	26.3411	26.4929	26.7612	amine metabolic process;amino acid activation;biosynthetic process;carboxylic acid metabolic process;cellular amine metabolic process;cellular amino acid metabolic process;cellular biosynthetic process;cellular component organization;cellular component organization at cellular level;cellular component organization or biogenesis;cellular component organization or biogenesis at cellular level;cellu…	adenyl nucleotide binding;adenyl ribonucleotide binding;ATP binding;binding;carbon-nitrogen ligase activity, with glutamine as amido-N-donor;catalytic activity;glutaminyl-tRNA synthase (glutamine-hydrolyzing) activity;ligase activity;ligase activity, forming carbon-nitrogen bonds;nucleotide binding;purine nucleotide binding;purine ribonucleoside triphosphate binding;purine ribonucleotide binding;…	cell part;cytoplasmic part;glutamyl-tRNA(Gln) amidotransferase complex;intracellular membrane-bounded organelle;intracellular organelle;intracellular part;macromolecular complex;membrane-bounded organelle;mitochondrion;organelle;protein complex			Amidase	Alternativesplicing;ATP-binding;Completeproteome;Ligase;Mitochondrion;Nucleotide-binding;Polymorphism;Proteinbiosynthesis;Referenceproteome
1323	5	4	41.1	11.676	0	55.444	20761000000	237	P17096;P17096-3	P17096;P17096-3	High mobility group protein HMG-I/HMG-Y	ENSG00000137309	HMGA1	-1.25811		0.0160481	1.21075	-0.632759	32.2056	32.1366	31.8808	29.8685	31.179	31.4012	aging;base-excision repair;biological regulation;biosynthetic process;cell aging;cellular biosynthetic process;cellular component assembly;cellular component assembly at cellular level;cellular component disassembly;cellular component disassembly at cellular level;cellular component organization;cellular component organization at cellular level;cellular component organization or biogenesis;cellul…	5'-deoxyribose-5-phosphate lyase activity;AT DNA binding;binding;carbon-oxygen lyase activity;catalytic activity;DNA binding;DNA-(apurinic or apyrimidinic site) lyase activity;hormone receptor binding;ligand-dependent nuclear receptor transcription coactivator activity;lyase activity;nuclear hormone receptor binding;nucleic acid binding;nucleic acid binding transcription factor activity;peroxisom…	cell part;chromatin;chromosomal part;cytoplasmic part;cytosol;heterochromatin;intracellular organelle part;intracellular part;macromolecular complex;nuclear part;nucleoplasm part;organelle part;protein complex;senescence-associated heterochromatin focus;transcription factor complex			AT_hook	3D-structure;Acetylation;Alternativesplicing;Chromosomalrearrangement;Chromosome;Completeproteome;Directproteinsequencing;DNA-binding;Host-virusinteraction;Methylation;Nucleus;Phosphoprotein;Referenceproteome;Repeat;Transcription;Transcriptionregulation
3424	8	8	26.2	36.436	0	37.388	1757400000	89	Q5TC12;Q5TC12-3;Q5TC12-2	Q5TC12;Q5TC12-3;Q5TC12-2	ATP synthase mitochondrial F1 complex assembly factor 1	ENSG00000123472	ATPAF1	-1.24722	+	0.0090992	3.82224	-0.784898	28.1433	27.9575	28.2229	26.8703	26.7841	26.9276	cellular component assembly;cellular component organization;cellular component organization or biogenesis;macromolecular complex assembly;macromolecular complex subunit organization;protein complex assembly;protein complex subunit organization		cell part;cytoplasmic part;intracellular membrane-bounded organelle;intracellular organelle;intracellular part;membrane-bounded organelle;mitochondrion;organelle			ATP11	Alternativesplicing;Completeproteome;Mitochondrion;Polymorphism;Referenceproteome;Transitpeptide
3103	13	13	55.2	41.9	0	170.92	9342500000	267	Q15738	Q15738	Sterol-4-alpha-carboxylate 3-dehydrogenase, decarboxylating	ENSG00000147383;ENSG00000269336	NSDHL	-1.24602	+	0.0100077	3.23598	-0.766468	30.6079	30.7864	30.6647	29.6531	29.2625	29.4054	alcohol metabolic process;anatomical structure development;biological regulation;biosynthetic process;blood vessel development;cell surface receptor linked signaling pathway;cellular process;cellular response to stimulus;cholesterol biosynthetic process;cholesterol metabolic process;developmental process;embryonic organ development;epidermis development;hair cycle process;hair follicle developmen…	3-beta-hydroxy-delta5-steroid dehydrogenase activity;catalytic activity;oxidoreductase activity;oxidoreductase activity, acting on CH-OH group of donors;oxidoreductase activity, acting on the CH-OH group of donors, NAD or NADP as acceptor;steroid dehydrogenase activity;steroid dehydrogenase activity, acting on the CH-OH group of donors, NAD or NADP as acceptor;sterol-4-alpha-carboxylate 3-dehydro…	cell part;cytoplasmic part;endoplasmic reticulum membrane;endoplasmic reticulum part;integral to membrane;intracellular organelle part;intracellular part;intrinsic to membrane;lipid particle;membrane;membrane part;organelle membrane;organelle part	Steroid biosynthesis		3Beta_HSD	Cholesterolbiosynthesis;Cholesterolmetabolism;Completeproteome;Diseasemutation;Ichthyosis;Lipidbiosynthesis;Lipidmetabolism;Membrane;Mentalretardation;NAD;Oxidoreductase;Referenceproteome;Steroidbiosynthesis;Steroidmetabolism;Sterolbiosynthesis;Sterolmetabolism;Transmembrane;Transmembranehelix
5952	12	12	32.4	61.728	0	57.831	1633500000	67	Q9NUQ6;Q9NUQ6-4;Q9NUQ6-3;Q9NUQ6-2	Q9NUQ6;Q9NUQ6-4;Q9NUQ6-3;Q9NUQ6-2	SPATS2-like protein	ENSG00000196141	SPATS2L	-1.24465		0.0100831	2.89868	-0.752663	28.3662	28.0666	28.2288	27.1347	26.7249	27.068			cell part;cytoplasm;intracellular non-membrane-bounded organelle;intracellular organelle;intracellular organelle part;intracellular part;non-membrane-bounded organelle;nuclear part;nucleolus;organelle;organelle part			DUF1387	Acetylation;Alternativesplicing;Coiledcoil;Completeproteome;Cytoplasm;Nucleus;Phosphoprotein;Referenceproteome
1715	16	4	56.7	36.983	0	124.99	6698600000	61	P36873;P36873-2	P36873;P36873-2	Serine/threonine-protein phosphatase PP1-gamma catalytic subunit	ENSG00000186298	PPP1CC	-1.24208		0.0160905	1.31296	-0.639238	30.5097	29.7364	30.8477	28.9085	29.7091	28.7498	acylglycerol catabolic process;acylglycerol metabolic process;biological regulation;carbohydrate metabolic process;catabolic process;cell cycle;cell division;cell surface receptor linked signaling pathway;cellular carbohydrate metabolic process;cellular catabolic process;cellular glucan metabolic process;cellular lipid catabolic process;cellular lipid metabolic process;cellular macromolecule meta…	binding;catalytic activity;cation binding;hydrolase activity;hydrolase activity, acting on ester bonds;ion binding;metal ion binding;phosphatase activity;phosphoprotein phosphatase activity;phosphoric ester hydrolase activity;protein serine/threonine phosphatase activity	cell division site part;cell part;chromosomal part;cleavage furrow;condensed chromosome kinetochore;cytoplasmic part;cytosol;histone methyltransferase complex;intracellular membrane-bounded organelle;intracellular non-membrane-bounded organelle;intracellular organelle;intracellular organelle part;intracellular part;kinetochore;macromolecular complex;membrane;membrane-bounded organelle;methyltrans…	Focal adhesion;Insulin signaling pathway;Long-term potentiation;Meiosis - yeast;Oocyte meiosis;Regulation of actin cytoskeleton;Vascular smooth muscle contraction		Metallophos	3D-structure;Acetylation;Alternativesplicing;Carbohydratemetabolism;Cellcycle;Celldivision;Centromere;Chromosome;Completeproteome;Cytoplasm;Directproteinsequencing;Disulfidebond;Glycogenmetabolism;Hydrolase;Iron;Kinetochore;Manganese;Metal-binding;Mitochondrion;Nucleus;Phosphoprotein;Polymorphism;Proteinphosphatase;Referenceproteome
5465	8	8	78.5	12.122	0	71.945	39828000000	378	Q9GZT3-2;Q9GZT3	Q9GZT3-2;Q9GZT3	SRA stem-loop-interacting RNA-binding protein, mitochondrial	ENSG00000119705	SLIRP	-1.24066	+	0.00829692	4.8671	-0.801337	32.605	32.701	32.593	31.4263	31.3242	31.4265	biological regulation;biosynthetic process;cellular biosynthetic process;cellular macromolecule biosynthetic process;cellular macromolecule metabolic process;cellular metabolic process;cellular nitrogen compound metabolic process;cellular process;macromolecule biosynthetic process;macromolecule metabolic process;metabolic process;nitrogen compound metabolic process;nucleic acid metabolic process;…	binding;nucleic acid binding;nucleotide binding;RNA binding	cell part;cytoplasmic part;intracellular membrane-bounded organelle;intracellular organelle;intracellular part;membrane-bounded organelle;mitochondrion;nucleus;organelle			RRM_1	Alternativesplicing;Completeproteome;Mitochondrion;Nucleus;Phosphoprotein;Referenceproteome;Repressor;RNA-binding;Transcription;Transcriptionregulation;Transitpeptide
4487	10	10	19.3	73.011	0	27.611	1103000000	56	Q8WWI5-3;Q8WWI5-2;Q8WWI5	Q8WWI5-3;Q8WWI5-2;Q8WWI5	Choline transporter-like protein 1	ENSG00000070214	SLC44A1	-1.23898		0.010971	2.50159	-0.730914	27.5534	27.5747	28.1392	26.5073	26.4601	26.5829	alcohol metabolic process;amine metabolic process;biosynthetic process;cellular amine metabolic process;cellular biogenic amine metabolic process;cellular biosynthetic process;cellular lipid metabolic process;cellular metabolic process;cellular nitrogen compound metabolic process;cellular process;ethanolamine-containing compound metabolic process;glycerolipid biosynthetic process;glycerolipid met…	active transmembrane transporter activity;amine transmembrane transporter activity;choline transmembrane transporter activity;substrate-specific transmembrane transporter activity;substrate-specific transporter activity;transmembrane transporter activity;transporter activity	cell part;cytoplasmic part;integral to membrane;intracellular organelle part;intracellular part;intrinsic to membrane;membrane;membrane part;mitochondrial membrane;mitochondrial outer membrane;mitochondrial part;organelle membrane;organelle outer membrane;organelle part;outer membrane;plasma membrane			Choline_transpo	Alternativesplicing;Cellmembrane;Completeproteome;Lipoprotein;Membrane;Mitochondrion;Mitochondrionoutermembrane;Myristate;Phosphoprotein;Polymorphism;Referenceproteome;Transmembrane;Transmembranehelix;Transport
3401	12	12	45.5	38.155	0	30.702	1653600000	87	Q5T440	Q5T440	Putative transferase CAF17, mitochondrial	ENSG00000181873	IBA57	-1.23754	+	0.00995647	3.31941	-0.764494	28.0943	28.4629	28.1955	27.0699	27.0455	26.9247	amine catabolic process;amine metabolic process;biosynthetic process;carboxylic acid catabolic process;carboxylic acid metabolic process;catabolic process;cellular amine metabolic process;cellular amino acid catabolic process;cellular amino acid metabolic process;cellular biosynthetic process;cellular catabolic process;cellular ketone metabolic process;cellular metabolic process;cellular nitrogen…	aminomethyltransferase activity;catalytic activity;methyltransferase activity;transferase activity;transferase activity, transferring one-carbon groups	cell part;cytoplasmic part;intracellular membrane-bounded organelle;intracellular organelle;intracellular part;membrane-bounded organelle;mitochondrion;organelle			GCV_T;GCV_T_C	Completeproteome;Hemebiosynthesis;Mitochondrion;Polymorphism;Referenceproteome;Transferase;Transitpeptide
2114	15	15	62.4	31.512	0	228.26	32017000000	475	P54709;P54709-2	P54709;P54709-2	Sodium/potassium-transporting ATPase subunit beta-3	ENSG00000069849	ATP1B3	-1.2353	+	0.00988056	3.29805	-0.762499	32.3136	32.3009	32.3866	31.2643	30.8724	31.1585	biological regulation;blood coagulation;cell migration;cell motility;cellular component movement;cellular process;coagulation;hemostasis;immune system process;leukocyte migration;locomotion;multicellular organismal process;regulation of biological quality;regulation of body fluid levels	active transmembrane transporter activity;ATPase activity;ATPase activity, coupled;ATPase activity, coupled to movement of substances;ATPase activity, coupled to transmembrane movement of ions;ATPase activity, coupled to transmembrane movement of ions, phosphorylative mechanism;ATPase activity, coupled to transmembrane movement of substances;catalytic activity;cation transmembrane transporter act…	caveola;cell part;cytoplasmic membrane-bounded vesicle;cytoplasmic part;cytoplasmic vesicle;intracellular membrane-bounded organelle;intracellular organelle;intracellular part;macromolecular complex;melanosome;membrane part;membrane raft;membrane-bounded organelle;membrane-bounded vesicle;organelle;pigment granule;plasma membrane part;protein complex;sodium:potassium-exchanging ATPase complex;ves…	Aldosterone-regulated sodium reabsorption;Bile secretion;Carbohydrate digestion and absorption;Cardiac muscle contraction;Endocrine and other factor-regulated calcium reabsorption;Gastric acid secretion;Mineral absorption;Pancreatic secretion;Protein digestion and absorption;Proximal tubule bicarbonate reclamation;Salivary secretion		Na_K-ATPase	Cellmembrane;Completeproteome;Disulfidebond;Glycoprotein;Iontransport;Membrane;Potassium;Potassiumtransport;Referenceproteome;Signal-anchor;Sodium;Sodium/potassiumtransport;Sodiumtransport;Transmembrane;Transmembranehelix;Transport
6364	14	14	53.4	38.534	0	220.97	16543000000	256	Q9UJZ1;Q9UJZ1-2	Q9UJZ1;Q9UJZ1-2	Stomatin-like protein 2, mitochondrial	ENSG00000165283	STOML2	-1.23391	+	0.00890392	4.26606	-0.786942	32.0074	31.8264	31.9235	30.6011	30.7462	30.7082	activation of immune response;alpha-beta T cell activation;antigen receptor-mediated signaling pathway;ATP biosynthetic process;ATP metabolic process;ATP synthesis coupled proton transport;biological regulation;biosynthetic process;calcium ion homeostasis;calcium ion transport;cation homeostasis;cation transport;CD4-positive, alpha-beta T cell activation;cell activation;cell surface receptor link…	binding;protein binding;receptor binding	cell part;cytoplasmic part;cytoskeleton;extrinsic to membrane;extrinsic to plasma membrane;intracellular non-membrane-bounded organelle;intracellular organelle;intracellular organelle part;intracellular part;membrane;membrane part;membrane raft;membrane-enclosed lumen;mitochondrial inner membrane;mitochondrial intermembrane space;mitochondrial membrane;mitochondrial part;non-membrane-bounded orga…			Band_7	Acetylation;Cellmembrane;Coiledcoil;Completeproteome;Directproteinsequencing;Lipid-binding;Membrane;Mitochondrion;Mitochondrioninnermembrane;Phosphoprotein;Polymorphism;Referenceproteome;Transitpeptide
5739	11	11	45.8	36.864	0	31.829	1500200000	65	Q9HBH5	Q9HBH5	Retinol dehydrogenase 14	ENSG00000240857	RDH14	-1.23391		0.0113393	2.28678	-0.716372	28.3153	28.0085	27.8609	27.0487	26.4762	26.9581		catalytic activity;oxidoreductase activity	cell part;cytoplasmic part;endoplasmic reticulum;intracellular membrane-bounded organelle;intracellular organelle;intracellular part;membrane-bounded organelle;mitochondrion;organelle			adh_short	Completeproteome;NADP;Oxidoreductase;Phosphoprotein;Referenceproteome
6106	21	21	39.4	81.462	0	155.02	9241600000	284	Q9NYY8;Q9NYY8-2	Q9NYY8;Q9NYY8-2	FAST kinase domain-containing protein 2	ENSG00000118246	FASTKD2	-1.23329	+	0.0100206	3.46499	-0.766689	30.6789	30.5614	30.5911	29.2112	29.565	29.3553	cellular macromolecule metabolic process;cellular metabolic process;cellular process;cellular protein metabolic process;cellular respiration;energy derivation by oxidation of organic compounds;generation of precursor metabolites and energy;macromolecule metabolic process;macromolecule modification;metabolic process;oxidation-reduction process;phosphate-containing compound metabolic process;phosph…	catalytic activity;kinase activity;phosphotransferase activity, alcohol group as acceptor;protein kinase activity;transferase activity;transferase activity, transferring phosphorus-containing groups	cell part;cytoplasmic part;intracellular membrane-bounded organelle;intracellular organelle;intracellular part;membrane-bounded organelle;mitochondrion;organelle			FAST_1;FAST_2;RAP	Alternativesplicing;Completeproteome;Polymorphism;Referenceproteome
849	11	11	70.9	27.873	0	137.65	8333900000	184	O95571	O95571	Persulfide dioxygenase ETHE1, mitochondrial	ENSG00000105755	ETHE1	-1.23126	+	0.00976884	3.3084	-0.76053	30.3708	30.4553	30.1185	29.1698	28.9619	29.1192	amine catabolic process;amine metabolic process;carboxylic acid catabolic process;carboxylic acid metabolic process;catabolic process;cellular amine metabolic process;cellular amino acid catabolic process;cellular amino acid metabolic process;cellular catabolic process;cellular ketone metabolic process;cellular metabolic process;cellular modified amino acid metabolic process;cellular nitrogen com…	binding;catalytic activity;cation binding;dioxygenase activity;hydrolase activity;ion binding;iron ion binding;metal ion binding;oxidoreductase activity;oxidoreductase activity, acting on single donors with incorporation of molecular oxygen;oxidoreductase activity, acting on single donors with incorporation of molecular oxygen, incorporation of two atoms of oxygen;sulfur dioxygenase activity;tran…	cell part;cytoplasmic part;intracellular membrane-bounded organelle;intracellular organelle;intracellular organelle lumen;intracellular organelle part;intracellular part;membrane-bounded organelle;membrane-enclosed lumen;mitochondrial matrix;mitochondrial part;nucleus;organelle;organelle lumen;organelle part			Lactamase_B	Acetylation;Completeproteome;Cytoplasm;Dioxygenase;Diseasemutation;Metal-binding;Mitochondrion;Nucleus;Oxidoreductase;Phosphoprotein;Referenceproteome;Transitpeptide
1659	4	4	11.7	58.025	0	4.1632	226450000	7	P34059	P34059	N-acetylgalactosamine-6-sulfatase	ENSG00000141012	GALNS	-1.22761		0.0210213	1.022	-0.594803	25.8641	24.4568	26.0724	24.0784	24.7194	23.9126	amine metabolic process;aminoglycan catabolic process;aminoglycan metabolic process;carbohydrate catabolic process;carbohydrate metabolic process;catabolic process;cellular catabolic process;cellular metabolic process;cellular process;glycosaminoglycan catabolic process;glycosaminoglycan metabolic process;keratan sulfate catabolic process;keratan sulfate metabolic process;macromolecule catabolic …	binding;catalytic activity;cation binding;hydrolase activity;hydrolase activity, acting on ester bonds;ion binding;metal ion binding;N-acetylgalactosamine-4-sulfatase activity;N-acetylgalactosamine-6-sulfatase activity;sulfuric ester hydrolase activity	cell part;cytoplasmic part;intracellular organelle lumen;intracellular organelle part;intracellular part;lysosomal lumen;membrane-enclosed lumen;organelle lumen;organelle part;vacuolar lumen;vacuolar part	Glycosaminoglycan degradation;Lysosome	GALNS-lysosomal hydrolase 1.27 MDa complex	Sulfatase	3D-structure;Calcium;Completeproteome;Directproteinsequencing;Diseasemutation;Disulfidebond;Dwarfism;Glycoprotein;Hydrolase;Lysosome;Metal-binding;Mucopolysaccharidosis;Polymorphism;Referenceproteome;Signal
2921	43	43	43.7	197.6	0	280.63	11172000000	464	Q14676-2;Q14676;Q14676-3;Q14676-4	Q14676-2;Q14676;Q14676-3;Q14676-4	Mediator of DNA damage checkpoint protein 1	ENSG00000137337;ENSG00000206481;ENSG00000224587;ENSG00000225589;ENSG00000228575;ENSG00000231135;ENSG00000234012;ENSG00000237095	MDC1	-1.22581	+	0.00908701	4.4185	-0.784862	30.8157	30.7217	30.8015	29.4449	29.6052	29.6113	biological regulation;cell cycle;cell cycle checkpoint;cellular macromolecule metabolic process;cellular metabolic process;cellular nitrogen compound metabolic process;cellular process;cellular response to stimulus;cellular response to stress;DNA damage checkpoint;DNA integrity checkpoint;DNA metabolic process;DNA recombination;DNA repair;double-strand break repair;double-strand break repair via …		adherens junction;anchoring junction;cell junction;cell part;cell-substrate adherens junction;cell-substrate junction;chromosome;focal adhesion;intracellular non-membrane-bounded organelle;intracellular organelle;intracellular organelle part;intracellular part;non-membrane-bounded organelle;nuclear part;nucleoplasm;organelle;organelle part		MDC1-H2AFX-TP53BP1 complex;MDC1-MRE11-RAD50-NBS1 complex;MDC1-MRN-ATM-FANCD2 complex;MDC1-p53BP1-SMC1 complex;MGC1-DNA-PKcs-Ku complex	FHA	3D-structure;Acetylation;Alternativesplicing;Cellcycle;Chromosome;Completeproteome;DNAdamage;DNArepair;Isopeptidebond;Nucleus;Phosphoprotein;Polymorphism;Referenceproteome;Repeat;Ublconjugation
4528	7	7	43.6	24.68	0	58.927	5212600000	111	Q92520	Q92520	Protein FAM3C	ENSG00000196937	FAM3C	-1.22071		0.0104839	2.92209	-0.740458	29.986	29.6946	29.8517	28.385	28.791	28.6941	developmental process;multicellular organismal development;multicellular organismal process	binding;cytokine activity;protein binding;receptor binding	cell part;cytoplasmic membrane-bounded vesicle;cytoplasmic part;cytoplasmic vesicle;extracellular region;Golgi apparatus;intracellular membrane-bounded organelle;intracellular organelle;intracellular part;membrane-bounded organelle;membrane-bounded vesicle;organelle;vesicle				Completeproteome;Cytoplasmicvesicle;Developmentalprotein;Disulfidebond;Oncogene;Referenceproteome;Secreted;Signal
640	8	8	39.9	28.823	0	92.616	5638000000	117	O75431-2;O75431	O75431-2;O75431	Metaxin-2	ENSG00000128654	MTX2	-1.21726		0.0127338	1.97677	-0.6883	30.1195	29.683	30.2219	28.5591	29.2135	28.6	cellular macromolecule metabolic process;cellular metabolic process;cellular process;cellular protein metabolic process;establishment of localization;establishment of localization in cell;establishment of protein localization;establishment of protein localization in mitochondrion;establishment of protein localization to organelle;intracellular protein transport;intracellular transport;macromolecu…		cell part;cytoplasmic part;intracellular organelle part;intracellular part;membrane;mitochondrial membrane;mitochondrial outer membrane;mitochondrial part;organelle membrane;organelle outer membrane;organelle part;outer membrane			Tom37	Completeproteome;Membrane;Mitochondrion;Mitochondrionoutermembrane;Proteintransport;Referenceproteome;Transport
3169	12	12	42.3	34.994	0	106.44	9884800000	206	Q16698-2;Q16698	Q16698-2;Q16698	2,4-dienoyl-CoA reductase, mitochondrial	ENSG00000104325	DECR1	-1.21633		0.0100708	3.32431	-0.752496	31.0749	30.7583	30.7442	29.7274	29.5829	29.6181	carboxylic acid catabolic process;carboxylic acid metabolic process;catabolic process;cellular catabolic process;cellular component assembly;cellular component organization;cellular component organization or biogenesis;cellular ketone metabolic process;cellular lipid catabolic process;cellular lipid metabolic process;cellular metabolic process;cellular process;fatty acid beta-oxidation;fatty acid…	2,4-dienoyl-CoA reductase (NADPH) activity;binding;catalytic activity;coenzyme binding;cofactor binding;NADP binding;NADPH binding;nucleotide binding;oxidoreductase activity;oxidoreductase activity, acting on NADH or NADPH;oxidoreductase activity, acting on the CH-CH group of donors;oxidoreductase activity, acting on the CH-CH group of donors, NAD or NADP as acceptor	cell part;cytoplasmic part;intracellular membrane-bounded organelle;intracellular organelle;intracellular organelle lumen;intracellular organelle part;intracellular part;membrane-bounded organelle;membrane-enclosed lumen;mitochondrial matrix;mitochondrial part;nucleus;organelle;organelle lumen;organelle part				3D-structure;Acetylation;Completeproteome;Fattyacidmetabolism;Lipidmetabolism;Mitochondrion;NADP;Oxidoreductase;Polymorphism;Referenceproteome;Transitpeptide
6212	4	4	23.9	38.673	0	22.782	902290000	20	Q9P2W9	Q9P2W9	Syntaxin-18	ENSG00000168818	STX18	-1.2163		0.011352	2.45252	-0.716524	27.828	27.3084	27.4249	26.3562	26.4797	26.0766	cellular process;ER to Golgi vesicle-mediated transport;establishment of localization;establishment of localization in cell;establishment of protein localization;Golgi vesicle transport;intracellular protein transport;intracellular transport;protein transport;transport;vesicle-mediated transport		cell part;cytoplasmic part;endoplasmic reticulum;endoplasmic reticulum membrane;endoplasmic reticulum part;Golgi apparatus part;Golgi membrane;integral to membrane;intracellular membrane-bounded organelle;intracellular organelle;intracellular organelle part;intracellular part;intrinsic to membrane;membrane;membrane part;membrane-bounded organelle;organelle;organelle membrane;organelle part	Phagosome;SNARE interactions in vesicular transport		Syntaxin-18_N	Coiledcoil;Completeproteome;Endoplasmicreticulum;ER-Golgitransport;Golgiapparatus;Membrane;Polymorphism;Proteintransport;Referenceproteome;Transmembrane;Transmembranehelix;Transport
516	27	25	59.7	74.435	0	154.82	11139000000	344	O60488-2;O60488	O60488-2;O60488	Long-chain-fatty-acid--CoA ligase 4	ENSG00000068366	ACSL4	-1.21555		0.0101256	3.21774	-0.748524	30.8094	30.7584	31.1515	29.6899	29.6717	29.7109	acyl-CoA biosynthetic process;acyl-CoA metabolic process;acylglycerol biosynthetic process;acylglycerol metabolic process;anatomical structure development;biological regulation;biosynthetic process;carboxylic acid transport;cellular biosynthetic process;cellular lipid metabolic process;cellular metabolic process;cellular process;coenzyme biosynthetic process;coenzyme metabolic process;cofactor bi…	acid-thiol ligase activity;adenyl nucleotide binding;adenyl ribonucleotide binding;arachidonate-CoA ligase activity;ATP binding;binding;catalytic activity;fatty acid ligase activity;ligase activity;ligase activity, forming carbon-sulfur bonds;long-chain fatty acid-CoA ligase activity;nucleotide binding;purine nucleotide binding;purine ribonucleoside triphosphate binding;purine ribonucleotide bind…	cell body;cell part;cytoplasmic part;endoplasmic reticulum membrane;endoplasmic reticulum part;integral to membrane;intracellular membrane-bounded organelle;intracellular organelle;intracellular organelle part;intracellular part;intrinsic to membrane;lipid particle;membrane;membrane part;membrane-bounded organelle;microbody;microbody membrane;microbody part;mitochondrial membrane;mitochondrial ou…	Adipocytokine signaling pathway;Fatty acid metabolism;Peroxisome;PPAR signaling pathway		AMP-binding	Alportsyndrome;Alternativesplicing;ATP-binding;Completeproteome;Deafness;Diseasemutation;Elliptocytosis;Endoplasmicreticulum;Fattyacidmetabolism;Hereditaryhemolyticanemia;Ligase;Lipidmetabolism;Magnesium;Membrane;Mentalretardation;Microsome;Mitochondrion;Mitochondrionoutermembrane;Nucleotide-binding;Peroxisome;Polymorphism;Referenceproteome;Signal-anchor;Transmembrane;Transmembranehelix
3508	4	4	51.5	10.89	0	7.1812	839120000	27	Q69YL0	Q69YL0	Uncharacterized protein NCBP2-AS2		NCBP2-AS2	-1.21375		0.0103972	2.98324	-0.739015	27.0144	27.429	27.0263	25.9054	25.8977	26.0253							Completeproteome;Referenceproteome
[truncated: 3,197 more rows]
